# Supplementary material for: Efficacy and safety of radiotherapy combined with atezolizumab plus bevacizumab in treating hepatocellular carcinoma with portal vein tumour thrombus: a study protocol
Source: PubMed Central journal article supplement — BMJ Open. 2022 Dec 14;12(12):e064688. doi: 10.1136/bmjopen-2022-064688 (PMC9756192; doi:10.1136/bmjopen-2022-064688), 2022-12-14
Supplement: bmjopen-2022-064688.draft_revisions.pdf [file bmjopen-2022-064688.draft_revisions.pdf]

# BMJ Open

BMJ Open is committed to open peer review. As part of this commitment we make the peer review history of every article we publish publicly available.

When an article is published we post the peer reviewers' comments and the authors' responses online. We also post the versions of the paper that were used during peer review. These are the versions that the peer review comments apply to.

The versions of the paper that follow are the versions that were submitted during the peer review process. They are not the versions of record or the final published versions. They should not be cited or distributed as the published version of this manuscript.

BMJ Open is an open access journal and the full, final, typeset and author-corrected version of record of the manuscript is available on our site with no access controls, subscription charges or pay-per-view fees (<http://bmjopen.bmj.com>).

If you have any questions on BMJ Open's open peer review process please email [info.bmjopen@bmj.com](mailto:info.bmjopen@bmj.com)

# BMJ Open

## Radiotherapy combined with atezolizumab plus bevacizumab for hepatocellular carcinoma with portal vein tumor thrombus

|                               |                                                                                                                                                                                                                                                                                                                                                                                                                                                                                                                                                                                                                                                       |
|-------------------------------|-------------------------------------------------------------------------------------------------------------------------------------------------------------------------------------------------------------------------------------------------------------------------------------------------------------------------------------------------------------------------------------------------------------------------------------------------------------------------------------------------------------------------------------------------------------------------------------------------------------------------------------------------------|
| Journal:                      | <i>BMJ Open</i>                                                                                                                                                                                                                                                                                                                                                                                                                                                                                                                                                                                                                                       |
| Manuscript ID                 | bmjopen-2022-064688                                                                                                                                                                                                                                                                                                                                                                                                                                                                                                                                                                                                                                   |
| Article Type:                 | Protocol                                                                                                                                                                                                                                                                                                                                                                                                                                                                                                                                                                                                                                              |
| Date Submitted by the Author: | 18-May-2022                                                                                                                                                                                                                                                                                                                                                                                                                                                                                                                                                                                                                                           |
| Complete List of Authors:     | Wang, Kang; Eastern Hepatobiliary Surgery Hospital<br>Yu, Hong-Ming; Eastern Hepatobiliary Surgery Hospital<br>Xiang, Yan-Jun; Eastern Hepatobiliary Surgery Hospital<br>Cheng, Yu-Qiang; Eastern Hepatobiliary Surgery Hospital<br>Ni, Qian-Zhi; Eastern Hepatobiliary Surgery Hospital; Shanghai Institute of Nutrition and Health Chinese Academy of Sciences<br>Guo, Wei-Xing; Eastern Hepatobiliary Surgery Hospital<br>Shi, Jie; Eastern Hepatobiliary Surgery Hospital<br>Feng, Shuang; Eastern Hepatobiliary Surgery Hospital<br>Zhai, Jian; Eastern Hepatobiliary Surgery Hospital<br>Cheng, Shu-Qun; Eastern Hepatobiliary Surgery Hospital |
| Keywords:                     | RADIOTHERAPY, Hepatobiliary tumours < ONCOLOGY, Adult oncology < ONCOLOGY                                                                                                                                                                                                                                                                                                                                                                                                                                                                                                                                                                             |
|                               |                                                                                                                                                                                                                                                                                                                                                                                                                                                                                                                                                                                                                                                       |

SCHOLARONE™  
Manuscripts

1  
2 **Radiotherapy combined with atezolizumab plus bevacizumab for hepatocellular carcinoma**  
3  
4 **with portal vein tumor thrombus**  
5  
6

7 **Short running title: Radiotherapy plus T+A for HCC with PVTT**  
8  
9

10  
11 Kang Wang<sup>1</sup>, Hong-Ming Yu<sup>1</sup>, Yan-Jun Xiang<sup>1</sup>, Yu-Qiang Cheng<sup>1</sup>, Qian-Zhi Ni<sup>1,2</sup>, Wei-Xing Guo<sup>1</sup>,  
12  
13 Jie Shi<sup>1</sup>, Shuang Feng<sup>3</sup>, Jian Zhai<sup>4</sup>, Shu-Qun Cheng<sup>1\*</sup>  
14  
15

16  
17 <sup>1</sup>Department of Hepatic Surgery VI, Eastern Hepatobiliary Surgery Hospital, Naval Medical  
18  
19 University, Shanghai, China  
20  
21

22  
23 <sup>2</sup>CAS Key Laboratory of Nutrition, Metabolism and Food Safety, Shanghai Institute of Nutrition and  
24  
25 Health, University of Chinese Academy of Sciences, Chinese Academy of Sciences, 200031,  
26  
27 Shanghai, China  
28  
29

30  
31 <sup>3</sup>Department of Radiotherapy, Eastern Hepatobiliary Surgery Hospital, Naval Medical University  
32  
33 Shanghai, China  
34  
35

36  
37 <sup>4</sup>Department II of Interventional Radiology, Eastern Hepatobiliary Surgery Hospital, Naval Medical  
38  
39 University, Shanghai, China  
40  
41

42 **\*Correspondence author:**  
43  
44

45  
46 Shu-Qun Cheng, M.D. Eastern Hepatobiliary Surgery Hospital, Naval Medical University, 225  
47  
48 Changhai Road, Shanghai, 200433 China  
49  
50

51  
52 Phone: (86) 21- 8187525  
53  
54

55  
56 Fax: (86) 21-65562400  
57  
58

59  
60 E-mail: [chengshuqun@smmu.edu.cn](mailto:chengshuqun@smmu.edu.cn)

## Abstract

**Introduction:** Vascular invasion and metastasis are poor prognostic factors in patients with hepatocellular carcinoma (HCC). The efficacy of available therapeutic regimens for unresectable HCC is not satisfactory in HCC with portal vein tumor thrombosis (PVTT). Therefore, this open-label, single-arm phase II clinical trial aims to investigate the efficacy and safety of radiotherapy combined with atezolizumab plus bevacizumab in treating HCC patients with PVTT.

**Methods and analysis:** We plan to enroll patients diagnosed with unresectable hepatocellular carcinoma complicated by PVTT. Radiotherapy combined with atezolizumab plus bevacizumab will be administered for treatment. Patients will initially receive radiotherapy, with each radiotherapy cycle lasting for 28 days and the total dose of tumor (DT) of 40 Gy/20 f/26 d. CT scan will be performed again, and the treatment plan will be reformulated after field constriction. The treatment will continue until the total DT is up to 54-56 Gy/27-28 f. The treatment with atezolizumab plus bevacizumab will be started at  $3\pm 1$  d after the initiation of radiotherapy and will continue until unacceptable toxicity or disease progression. The primary endpoint is objective response rate (ORR), while the secondary endpoints include overall survival, disease control rate, progression-free survival, time to progression, duration of response, and the rate of surgical conversions. Assuming an ORR of 47%, with a two-sided alpha error of 0.1, 90% power and 10% dropout rate, the required number of evaluable patients is 42.

**Ethics and dissemination:** This study will be conducted according to the standards of Good Clinical Practice and in compliance with the principles of the Declaration of Helsinki. The Ethics Committee of our Hospital has approved the protocol (EHBHKY2021-K-017). All participants are required to provide written informed consent. The results of the trial will be published in peer-reviewed journals and presented at international conferences.

**Registration details:** ChiCTR.org, registration number: ChiCTR2100049831.

**Keywords:** *Hepatocellular carcinoma, portal vein tumor thrombus, radiotherapy, atezolizumab, bevacizumab*

### **Strengths and limitations of this study**

- While optimal treatment are yet to be determined, this study might help explore effective treatment strategies for patients with HCC complicated by PVTT.
- The combination of radiotherapy and immunotherapy plus targeted therapy in this study might improve the efficacy in patients with HCC complicated by PVTT.
- This study was a single-arm trial without a control group with small sample size.

### **Introduction**

Liver cancer is the seventh most common cancer and the second most deadly cancer, with more than 900,000 new cases being diagnosed worldwide every year.<sup>1</sup> In China, the prevalence of liver cancer is about 26.67/100000,<sup>2</sup> while the 5-year survival rate is only around 12%.<sup>3</sup> Hepatocellular carcinoma (HCC) is the most common histological subtype of primary liver cancer,<sup>4</sup> and surgery is the preferred and most efficacious approach for the treatment of HCC. However, some patients lose the chance for surgery at the time of diagnosis due to their intermediate to advanced tumors, liver dysfunction, etc.

<sup>5</sup> Local therapies (including radiotherapy) and systemic therapies are important options for prolonging the survival of HCC patients who cannot undergo surgical resection. Due to the promising antitumor activity and favorable safety profile in the IMbrave150 trial with the mortality risk being decreased by 42% comparing with sorafenib,<sup>6</sup> atezolizumab plus bevacizumab have become the standard first-line therapy for unresectable HCC. Yet, the objective response rate (ORR) with atezolizumab plus bevacizumab in unresectable HCC patients was reported to be only 27.3%.<sup>6</sup> Hence, improving the therapeutic effect in patients is still a great clinical challenge.

Vascular invasion and metastasis are commonly seen in patients with intermediate to advanced-stage HC as 44%-62% of patients with advanced HCC have been reported to develop portal vein tumor

1  
2 thrombosis (PVTT).<sup>7</sup> In addition, the range and severity of PVTT have been significantly associated  
3  
4 with the prognosis of unresectable HCC patients, with the median overall survival was just 2.7 to 4  
5  
6 months in naive HCC patients with PVTT.<sup>8</sup> However, there are significant differences between  
7  
8 eastern and western countries in the treatment strategies used for HCC patients with PVTT.<sup>9</sup>  
9  
10 Guidelines from western countries argue that HCC complicated with PVTT represents the advanced  
11  
12 stage of HCC, advocating sorafenib as the only treatment option.<sup>10-12</sup> On the contrary, eastern  
13  
14 countries adopt positive strategies, such as surgical resection, radiotherapy, transcatheter arterial  
15  
16 chemoembolization (TACE), and surgery combined with multidisciplinary therapies, which are  
17  
18 expected to improve the long-term survival of these patients.<sup>13</sup>  
19  
20  
21  
22

23  
24 Radiotherapy is recommended for unresectable HCC patients with types I, II, and III PVTT, whose  
25  
26 liver function is graded as Child-Pugh A and B. In addition, previous studies have shown that  
27  
28 radiotherapy can synergistically enhance the anti-tumor effect of immunotherapy and targeted therapy  
29  
30 by changing the tumor microenvironment.<sup>14 15</sup> At present, radiotherapy combined with  
31  
32 immunotherapy and targeted therapy is currently one of the dominant research topics within the tumor  
33  
34 area. A number of studies have also suggested that radiotherapy combined with sorafenib alone  
35  
36 improves OS in patients with HCC complicated by PVTT.<sup>16</sup> In addition, the results of a previous  
37  
38 retrospective study showed that radiotherapy combined with atezolizumab plus bevacizumab was  
39  
40 feasible in unresectable HCC.<sup>17</sup> However, whether the combination of radiotherapy and  
41  
42 immunotherapy plus targeted therapy can improve the efficacy in patients with HCC complicated by  
43  
44 PVTT needs to be further verified.  
45  
46  
47  
48  
49

50  
51 Therefore, we proposed an open-label, multi-center, single-arm phase II clinical trial. Patients  
52  
53 diagnosed with locally advanced or metastatic and/or unresectable HCC complicated with PVTT will  
54  
55 be preliminarily enrolled to explore the efficacy and safety of radiotherapy combined with  
56  
57 atezolizumab plus bevacizumab, which is expected to provide an efficacious therapeutic regimen for  
58  
59  
60

1  
2 HCC patients with PVTT and further improve the treatment response and prognosis. Here, we present  
3  
4 the protocol in accordance with the SPIRIT reporting checklist.  
5  
6

## 7 **Methods and analysis**

### 8 **Study design and objective**

9  
10  
11  
12  
13  
14 This open-label, multi-center, single-arm clinical trial will enroll patients diagnosed with locally  
15 advanced or metastatic and/or unresectable HCC complicated with PVTT from the departments of  
16 hepatobiliary surgery of our Hospitals between August 2021 and December 2021 so as to initially  
17 explore the efficacy and safety of radiotherapy combined with atezolizumab plus bevacizumab in  
18 naive patients with unresectable HCC complicated by PVTT.  
19  
20  
21  
22  
23  
24  
25  
26

### 27 **Eligibility criteria**

28  
29  
30 The key inclusion criteria are as follows: 1) Males or non-pregnant females aged between 18 and 70  
31 years old; 2) Signed informed consent form; 3) Able to comply with the study protocol according to  
32 the investigator's judgment; 4) Histologically, cytologically or clinically diagnosed with  
33 hepatocellular carcinoma (HCC); 5) Confirmed portal vein tumor thrombus by imaging findings; 6)  
34 Not suitable for radical surgical treatment; 7) Have not received any anti-tumor treatment; 8) At least  
35 one measurable untreated lesion (per RECIST 1.1); 9) Pre-treatment tumor tissue sample (if available);  
36  
37  
38  
39  
40  
41  
42  
43  
44  
45  
46  
47  
48  
49  
50  
51  
52  
53  
54  
55  
56  
57  
58  
59  
60  
10) ECOG Performance Status of 0 or 1 within 7 days prior to initiation of study treatment; 11) Child-  
Pugh class A within 7 days prior to initiation of study treatment; 12) Adequate hematologic and organ  
functions, based on the following laboratory test results obtained within 7 days prior to initiation of  
study treatment; 13) Resolution of any acute, clinically significant treatment-related toxicity from  
prior therapy to grade < 1 prior to study entry, with the exception of alopecia; 14) Negative HIV test  
at screening.

1  
2 The key exclusion criteria are as follows: 1) History of the leptomenigeal disease; 2) Active or  
3  
4 history of autoimmune disease or immune deficiency; 3) History of idiopathic pulmonary fibrosis,  
5  
6 organizing pneumonia (e.g., bronchiolitis obliterans), drug-induced pneumonitis, or idiopathic  
7  
8 pneumonitis, or evidence of active pneumonitis on screening chest computed tomography (CT) scan.  
9  
10 History of radiation pneumonitis in the radiation field (fibrosis) is permitted; 4) Active tuberculosis;  
11  
12  
13 5) Significant cardiovascular disease (such as New York Heart Association Class II or greater cardiac  
14  
15 disease, myocardial infarction, or cerebrovascular accident) within 3 months prior to initiation of  
16  
17 study treatment, unstable arrhythmia, or unstable angina; 6) History of congenital long QT syndrome  
18  
19 or corrected QT interval > 500 ms (calculated with the use of the Fridericia method) at screening; 7)  
20  
21 History of uncorrectable electrolyte disorder affecting serum levels of potassium, calcium, or  
22  
23 magnesium; 8) The major surgical procedure, other than for diagnosis, within 4 weeks prior to  
24  
25 initiation of study treatment, or anticipation of the need for a major surgical procedure during the  
26  
27 study; 9) History of malignancy other than HCC within 5 years prior to screening; 10) Severe  
28  
29 infection within 4 weeks prior to initiation of study treatment; 11) Treatment with therapeutic oral  
30  
31 or intravenous antibiotics within 2 weeks prior to initiation of study treatment; 12) Prior allogeneic  
32  
33 stem cell or solid organ transplantation; 13) Untreated or incompletely treated esophageal and/or  
34  
35 gastric varices that are bleeding or have a high risk for bleeding; 15) Co-infection of HBV and HCV;  
36  
37  
38  
39  
40  
41 16) Symptomatic, untreated, or actively progressing central nervous system (CNS) metastases.  
42  
43  
44

### 45 **Treatment plan**

46  
47  
48 Patients will initially receive radiotherapy with each cycle for 28 days. A treatment plan will be  
49  
50 established after CT location. The clinical target volume (CTV) includes tumors and tumor thrombi.  
51  
52 The planning target volume (PTV) will be expanded by 0.5-1.0 cm, with conventional fractionation  
53  
54 at a single dose of 180-220 cGy. Total DT will be 40 Gy/20 f/26 d. CT scan will be performed at the  
55  
56 end of every cycle, and the treatment plan will be reformulated after field constriction. The treatment  
57  
58 will continue until the total DT is up to 54-56 Gy/27-28 f.  
59  
60



1  
2 The treatment with atezolizumab plus bevacizumab will be started at  $3\pm 1$  d after the initiation of  
3  
4 radiotherapy. Each treatment cycle will last for 21 days. On the first day of each cycle, atezolizumab  
5  
6 injection will be intravenously administered at a fixed dose of 1,200 mg (initial intravenous injection  
7  
8 for 60 min, and subsequent intravenous injections for 30 min if well-tolerated). Bevacizumab at a  
9  
10 dose of 15 mg/kg will be intravenously administered at least 5 min apart (initial intravenous injection  
11  
12 for 90 min, and subsequent intravenous injections reduced to 60 min and 30 min if well-tolerated).

13  
14  
15 The treatment will continue until any unacceptable toxicity is found or disease progression occurs.

16  
17  
18  
19 In case of severe toxicity, the administration will be delayed and/or the dose will be reduced. If any  
20  
21 serious adverse event (SAE) occurs during the radiotherapy, or the radiotherapy is delayed for more  
22  
23 than 4 weeks for any reason, radiotherapy sessions will be terminated. The doses of atezolizumab and  
24  
25 bevacizumab will be adjusted according to the drug's instructions.

## 26 27 28 29 **Endpoints**

30  
31  
32  
33 The primary endpoint is ORR, which is defined as the proportion of patients with Complete Response  
34  
35 (CR) and Partial Response (PR). CR or PR is assessed in accordance with Response  
36  
37 Evaluation Criteria In Solid Tumors (RECIST) 1.1.

38  
39  
40  
41 Secondary endpoints include: (1) OS, defined as the time between first study treatment and death (for  
42  
43 any reason). (2) Disease control rate (DCR), defined as the percentage of subjects with the best  
44  
45 response as CR, PR, or stable disease (SD). (3) Progression free survival (PFS), defined as the time  
46  
47 between first treatment and first tumor progression or appearance of a new lesion or death due to any  
48  
49 cause, whichever occurs first. (4) Time to progression (TTP), defined as the time between first  
50  
51 treatment to first tumor progression. (5) Duration of response (DOR), defined as the time from first  
52  
53 tumor remission to first tumor progression or death due to any cause. The DCRs, PFSs, TTPs and  
54  
55 DORs will be calculated in accordance with the RECIST version 1.1, modified RECIST (mRECIST),  
56  
57 and immune-modified RECIST (imRECIST), respectively. (6) The rate of surgical conversions is  
58  
59  
60

1  
2 defined as the proportion of subjects who receive the study treatment and are assessed to be viable  
3  
4 for surgical resection. The resectability criteria include successful down-staging of the tumor,  
5  
6 sufficient future liver remnant (FLR), and technically resectable assessed by the investigator.  
7  
8

9  
10 Adverse events (AEs) are assessed in accordance with the NCI Common Terminology Criteria for  
11  
12 Adverse Event (CTCAE V5.0). Monitoring will be performed from the date on which the patient  
13  
14 signs the informed consent to 90 days after the last treatment.  
15  
16

17  
18 Biomarkers for exploratory endpoints include metagenomic sequencing of fecal organisms, 5 gene  
19  
20 indexes of hepatocellular carcinoma (HN1, RAN, RAMP3, KRT19, TAF9), immune correlation  
21  
22 detection (programmed death-ligand 1 [PD-L1] expression, CD8 expression; microsatellite instability  
23  
24 [MSI], and tumor mutational burden [TMB], immune-related gene expression, RNA-seq) and other  
25  
26 checkpoint proteins and cell surface markers.  
27  
28

### 29 30 **Participant timeline**

31  
32 **Table 1** lists the time points for assessing efficacy, adverse events, laboratory safety assessments  
33  
34 (hematology, coagulation, and chemistry), physical examination, electrocardiogram (ECG), and  
35  
36 tumor measurements.  
37  
38  
39  
40  
41  
42  
43  
44  
45  
46  
47  
48  
49  
50  
51  
52  
53  
54  
55  
56  
57  
58  
59  
60

**Table 1.** Schema of Single-arm Clinical Trial

| Item                              | Screening Period |         | Treatment Period                          |                                           |          | End of Trial         | Survival Follow-up     |
|-----------------------------------|------------------|---------|-------------------------------------------|-------------------------------------------|----------|----------------------|------------------------|
|                                   | -28 - 0d         | -7 - 0d | 4 weeks after the first treatment session | 7 weeks after the first treatment session | n cycles | Perioperative Period | 30 days after checkout |
| <b>Window period (days)</b>       | —                | —       |                                           |                                           |          |                      | ±7                     |
| <b>Informed consent</b>           | ×                |         |                                           |                                           |          |                      |                        |
| <b>Demographics</b>               |                  |         |                                           |                                           |          |                      |                        |
| <b>Past medical history</b>       | ×                |         |                                           |                                           |          |                      |                        |
| <b>History of tumor treatment</b> |                  |         |                                           |                                           |          |                      |                        |
| <b>Physical examination</b>       |                  | ×       | ×                                         | Every 3 weeks                             |          | ×                    |                        |
| <b>Vital signs</b>                |                  | ×       | ×                                         | Every 3 weeks                             |          | ×                    |                        |
| <b>ECOG</b>                       |                  | ×       | ×                                         | Every 3 weeks                             |          | ×                    |                        |
| <b>Pregnancy test</b>             |                  | ×       |                                           |                                           |          |                      |                        |
| <b>Infection screening</b>        | ×                |         |                                           |                                           |          |                      |                        |
| <b>Imaging</b>                    | ×                |         | ×                                         | Every 6 weeks                             |          | ×                    | ×                      |
| <b>Tumor markers</b>              |                  | ×       | ×                                         | Every 6 weeks                             |          | ×                    |                        |
| <b>Echocardiography</b>           | ×                |         |                                           |                                           |          |                      |                        |
| <b>Tumor tissue</b>               | ×                |         |                                           |                                           |          |                      |                        |
| <b>12-lead electrocardiogram</b>  |                  | ×       | When clinically indicated                 |                                           |          |                      | ×                      |
| <b>Blood biochemistry</b>         |                  | ×       | ×                                         | Every 3 weeks                             |          |                      | ×                      |

|    |                                         |   |   |               |               |   |   |
|----|-----------------------------------------|---|---|---------------|---------------|---|---|
| 1  |                                         |   |   |               |               |   |   |
| 2  |                                         |   |   | Every 3 weeks |               |   |   |
| 3  | <b>Routine blood test</b>               | × | × |               |               |   | × |
| 4  |                                         |   |   |               |               |   |   |
| 5  |                                         |   |   | Every 3 weeks |               |   |   |
| 6  | <b>Routine urine test</b>               | × | × |               |               |   | × |
| 7  |                                         |   |   |               |               |   |   |
| 8  | <b>Routine stool test</b>               | × | × | Every 3 weeks |               |   | × |
| 9  |                                         |   |   |               |               |   |   |
| 10 | <b>Thyroid function, pituitary</b>      |   |   |               |               |   |   |
| 11 | <b>function, coagulation</b>            | × | × | Every 3 weeks |               |   | × |
| 12 |                                         |   |   |               |               |   |   |
| 13 | <b>Gut microbiome testing for the</b>   |   |   |               |               |   |   |
| 14 | <b>stool sample</b>                     | × |   | ×             |               |   | × |
| 15 |                                         |   |   |               |               |   |   |
| 16 | <b>Biomarker testing for the blood</b>  |   |   |               |               |   |   |
| 17 | <b>sample</b>                           | × |   | ×             |               |   | × |
| 18 |                                         |   |   |               |               |   |   |
| 19 | <b>Surgical resection</b>               |   |   |               |               | × |   |
| 20 |                                         |   |   |               |               |   |   |
| 21 | <b>Surgical complications</b>           |   |   |               |               | × |   |
| 22 |                                         |   |   |               |               |   |   |
| 23 | <b>Concomitant medication</b>           | × | × | ×             | Every 3 weeks |   | × |
| 24 | <b>Adverse events</b>                   | × | × | ×             | Every 3 weeks |   | × |
| 25 |                                         |   |   |               |               |   |   |
| 26 | <b>Compliance evaluation</b>            | × | × | ×             | Every 3 weeks |   |   |
| 27 | <b>Dispensing of drugs</b>              |   |   | ×             | Every 3 weeks |   |   |
| 28 |                                         |   |   |               |               |   |   |
| 29 | <b>Recovery of drugs</b>                |   |   | ×             | Every 3 weeks |   | × |
| 30 |                                         |   |   |               |               |   |   |
| 31 | <b>Follow-up on survival status and</b> |   |   |               |               |   |   |
| 32 | <b>anti-tumor treatment</b>             |   |   |               |               |   | × |
| 33 |                                         |   |   |               |               |   |   |

1  
2 Furthermore, for the testing of biomarkers as exploratory endpoints, stool and blood samples will be  
3  
4 collected from patients prior to the first treatment, at 7 weeks after the first treatment, and after  
5  
6 treatment discontinuation, respectively.  
7  
8  
9

### 10 **Data collection and management**

11  
12  
13 The completed CRFs will be submitted to the respective sites for archiving. All data will be recorded  
14  
15 in an electronic case report form (eCRF) by investigators or clinical research coordinators. All study  
16  
17 documents will be confidential. All study data, including confirmation of all patients (effective check  
18  
19 on recorded information, such as study cases), all original copies of signed ICFs, as well as detailed  
20  
21 original records of drug distribution, shall be kept uniformly by the study institution until 5 years after  
22  
23 the end of the trial.  
24  
25  
26  
27

### 28 **Statistical methods**

29  
30  
31 According to the results of IMbrave150,<sup>6</sup> the ORR of atezolizumab plus bevacizumab in unresectable  
32  
33 HCC patients was 27.3%. Assuming an ORR of 47%, with a two-sided alpha error of 0.1, 90% power,  
34  
35 and 10% dropout rate, the required number of evaluable patients is 42.  
36  
37  
38  
39

40 The efficacy assessment is based on the full analysis set (FAS). The intention-to-treat (ITT) efficacy  
41  
42 analysis will be performed for subjects who received at least one session of the study treatment based  
43  
44 on the FAS. No supplementation will be made for missing values. The safety analysis set (SAS)  
45  
46 includes all enrolled subjects who have received at least one session of study treatment and have a  
47  
48 post-treatment safety record. This dataset will be used for safety analysis.  
49  
50  
51

### 52 **Monitoring**

53  
54  
55 An independent Data and Safety Monitoring Committee has been established to assess the safety data  
56  
57 if serious adverse events occur. Any adverse events will be registered. A qualified and independent  
58  
59  
60

1  
2 auditor is appointed to audit the trial systems, and the audit will be conducted before and during the  
3  
4 study following a written procedure.  
5  
6

## 7 **Patient and public involvement**

8  
9  
10 The patients and general public were not involved in the trial design.  
11  
12

## 13 **Discussion**

14  
15  
16  
17  
18 Atezolizumab plus bevacizumab is the standard first-line therapy for unresectable HCC patients.  
19  
20 Although the combination can significantly improve the prognosis in patients, the ORR is still not  
21  
22 satisfactory.<sup>6</sup> Improving the therapeutic effect in patients is still a great clinical challenge. For patients  
23  
24 with HCC, vascular invasion and metastasis are important reasons these patients cannot undergo  
25  
26 surgical resection as well as poor prognostic factors. Radiotherapy has an important role in treating  
27  
28 patients with PVTT; however, the therapeutic effects are still limited. Previous clinical studies have  
29  
30 shown that radiotherapy combined with targeted therapy, such as sorafenib, tends to prolong the  
31  
32 overall survival of patients with HCC complicated by PVTT. In the meanwhile, a retrospective study  
33  
34 reported the feasibility of radiotherapy combined with atezolizumab plus bevacizumab in  
35  
36 unresectable HCC.<sup>17</sup> However, evidence on whether the combination of radiotherapy with  
37  
38 atezolizumab plus bevacizumab can improve the therapeutic effects in unresectable HCC patients  
39  
40 with PVTT are still warranted. Accordingly, this open-label, multi-center, single-arm clinical trial  
41  
42 was designed to preliminarily explore the efficacy and safety of radiotherapy combined with  
43  
44 atezolizumab plus bevacizumab in naive unresectable HCC patients with PVTT.  
45  
46  
47  
48  
49  
50

51  
52 There are several limitations in the present study that should be considered. First, this is a single-arm  
53  
54 clinical trial without a control group that could be used to compare the efficacy and safety between  
55  
56 treatment regimens. Second, since this study is an exploratory trial with small sample size, no  
57  
58 confirmatory efficacy conclusions can be drawn. The conclusions of this study may serve as  
59  
60 preliminary evidence for subsequent large-scale, randomized, controlled clinical trials.

1  
2 As the prognosis in unresectable HCC patients with PVTT remains poor, there is an urgent need to  
3  
4 find an efficacious and safe therapeutic regimen. In this study, the efficacy and safety of radiotherapy  
5  
6 combined with atezolizumab plus bevacizumab in native unresectable HCC patients with PVTT will  
7  
8 be investigated so as to explore a new therapeutic regimen and further improve the efficacy and  
9  
10 prognosis in these patients.  
11  
12

### 13 14 **Ethics and dissemination**

15  
16  
17  
18 This study will be conducted according to the standards of Good Clinical Practice and in compliance  
19  
20 with the principles of the Declaration of Helsinki. The Ethics Committee of our Hospital has approved  
21  
22 the protocol (EHBHKY2021-K-017). All participants are required to provide written informed  
23  
24 consent. The results of the trial will be published in peer-reviewed journals and presented at  
25  
26 international conferences.  
27  
28

### 29 30 **Trial status**

31  
32  
33  
34 The trial has been registered in ChiCTR.org (Registration number: ChiCTR2100049831; registration  
35  
36 date: 2021-08-10; <http://www.chictr.org.cn/showproj.aspx?proj=126593>). Recruitment is ongoing.  
37  
38 The protocol version number is 1.0. The study protocol has been reported in accordance with the  
39  
40 Standard Protocol Items: Recommendations for Clinical Interventional Trials (SPIRIT) guidelines.  
41  
42  
43

### 44 45 **Acknowledgements**

46  
47  
48 The authors would like to thank the patients, their families, and all the investigators who will  
49  
50 participate in the present study.  
51  
52

### 53 54 **Data Sharing Statement**

55  
56  
57 We will widely disseminate the results of this clinical trial through conference presentations and  
58  
59 publications in relevant journals. All evaluation forms, reports, and other records will be identified in  
60

1  
2 a manner designed to maintain participants' confidentiality. All records will be kept in a secure  
3  
4 storage area with limited access. Data during the study are available from the study leader upon  
5  
6 reasonable request.  
7  
8  
9

### 10 **Authors' contributions**

11  
12  
13 Kang Wang and Yan-Jun Xiang drafted the manuscript. Kang Wang, Yan-Jun Xiang, and Hong-Ming  
14  
15 Yu contributed equally to this work. Shu-Qun Cheng, Kang Wang, Yan-Jun Xiang, and Hong-Ming  
16  
17 Yu designed the trial. Yu-Qiang Cheng, Qian-Zhi Ni, Wei-Xing Guo, Jie Shi, Shuang Feng, and Jian  
18  
19 Zhai are responsible for planning the data analysis and analyzing the data resulting from the trial. All  
20  
21 named authors adhere to the authorship guidelines of Trials. All authors have agreed to publication.  
22  
23 All authors read and approved the final manuscript.  
24  
25  
26  
27

### 28 **Funding**

29  
30  
31 This work was supported by the Clinical Research Plan of SHDC (No. SHDC2020CR1004A), the  
32  
33 State Key Program of National Natural Science Foundation of China (No: 81730097), the National  
34  
35 Natural Science Foundation of China (No: 82072618), and the Science and Technology Commission  
36  
37 Foundation of Shanghai Municipality (No: 19411967300). The Fundings have no roles in the design  
38  
39 of the study and collection, analysis, and interpretation of data and in writing the manuscript.  
40  
41  
42  
43

### 44 **Conflict of interest**

45  
46  
47 The authors have no conflicts of interest to declare.  
48  
49  
50  
51  
52  
53  
54  
55  
56  
57  
58  
59  
60



## Reference

1. Sung H, Ferlay J, Siegel RL, et al. Global Cancer Statistics 2020: GLOBOCAN Estimates of Incidence and Mortality Worldwide for 36 Cancers in 185 Countries. *CA: a cancer journal for clinicians* 2021;71(3):209-49. doi: 10.3322/caac.21660 [published Online First: 2021/02/05]
2. Zheng R, Qu C, Zhang S, et al. Liver cancer incidence and mortality in China: Temporal trends and projections to 2030. *Chin J Cancer Res* 2018;30(6):571-79. doi: 10.21147/j.issn.1000-9604.2018.06.01
3. Zeng H, Chen W, Zheng R, et al. Changing cancer survival in China during 2003–15: a pooled analysis of 17 population-based cancer registries. *The Lancet Global Health* 2018;6(5):e555-e67. doi: 10.1016/s2214-109x(18)30127-x
4. Craig AJ, von Felden J, Garcia-Lezana T, et al. Tumour evolution in hepatocellular carcinoma. *Nat Rev Gastroenterol Hepatol* 2020;17(3):139-52. doi: 10.1038/s41575-019-0229-4
5. Kudo M, Trevisani F, Abou-Alfa GK, et al. Hepatocellular Carcinoma: Therapeutic Guidelines and Medical Treatment. *Liver Cancer* 2016;6(1):16-26. doi: 10.1159/000449343
6. Finn RS, Qin S, Ikeda M, et al. Atezolizumab plus Bevacizumab in Unresectable Hepatocellular Carcinoma. *N Engl J Med* 2020;382(20):1894-905. doi: 10.1056/NEJMoa1915745
7. Zhang ZM, Lai EC, Zhang C, et al. The strategies for treating primary hepatocellular carcinoma with portal vein tumor thrombus. *Int J Surg* 2015;20:8-16. doi: 10.1016/j.ijssu.2015.05.009
8. Pawarode A, Voravud N, Sriuranpong V, et al. Natural history of untreated primary hepatocellular carcinoma: a retrospective study of 157 patients. *Am J Clin Oncol* 1998;21(4):386-91. doi: 10.1097/00000421-199808000-00014

- 1  
2 9. Lu J, Zhang XP, Zhong BY, et al. Management of patients with hepatocellular carcinoma and  
3  
4 portal vein tumour thrombosis: comparing east and west. *Lancet Gastroenterol Hepatol*  
5  
6 2019;4(9):721-30. doi: 10.1016/S2468-1253(19)30178-5  
7  
8
- 9  
10 10. Heimbach JK, Kulik LM, Finn RS, et al. AASLD guidelines for the treatment of hepatocellular  
11  
12 carcinoma. *Hepatology* 2018;67(1):358-80. doi: 10.1002/hep.29086  
13  
14
- 15  
16 11. European Association For The Study Of The L, European Organisation For R, Treatment Of C.  
17  
18 EASL-EORTC clinical practice guidelines: management of hepatocellular carcinoma. *J*  
19  
20 *Hepatol* 2012;56(4):908-43. doi: 10.1016/j.jhep.2011.12.001  
21  
22
- 23  
24 12. Omata M, Lesmana LA, Tateishi R, et al. Asian Pacific Association for the Study of the Liver  
25  
26 consensus recommendations on hepatocellular carcinoma. *Hepatol Int* 2010;4(2):439-74. doi:  
27  
28 10.1007/s12072-010-9165-7  
29  
30
- 31  
32 13. Yoon SM, Ryoo BY, Lee SJ, et al. Efficacy and Safety of Transarterial Chemoembolization Plus  
33  
34 External Beam Radiotherapy vs Sorafenib in Hepatocellular Carcinoma With Macroscopic  
35  
36 Vascular Invasion: A Randomized Clinical Trial. *JAMA Oncol* 2018;4(5):661-69. doi:  
37  
38 10.1001/jamaoncol.2017.5847  
39  
40
- 41  
42 14. Arina A, Gutiontov SI, Weichselbaum RR. Radiotherapy and Immunotherapy for Cancer: From  
43  
44 "Systemic" to "Multisite". *Clin Cancer Res* 2020;26(12):2777-82. doi: 10.1158/1078-  
45  
46 0432.CCR-19-2034  
47  
48
- 49  
50 15. Ozpiskin OM, Zhang L, Li JJ. Immune targets in the tumor microenvironment treated by  
51  
52 radiotherapy. *Theranostics* 2019;9(5):1215-31. doi: 10.7150/thno.32648  
53  
54
- 55  
56 16. Yu JI, Yoon SM, Park HC, et al. Multicenter validation study of a prognostic index for portal vein  
57  
58 tumor thrombosis in hepatocellular carcinoma. *Cancer Res Treat* 2014;46(4):348-57. doi:  
59  
60 10.4143/crt.2013.142

1  
2 17. Manzar GS, De BS, Abana CO, et al. Outcomes and Toxicities of Modern Combined Modality  
3  
4 Therapy with Atezolizumab Plus Bevacizumab and Radiation Therapy for Hepatocellular  
5  
6 Carcinoma. *Cancers (Basel)* 2022;14(8) doi: 10.3390/cancers14081901 [published Online  
7  
8 First: 2022/04/24]  
9  
10  
11  
12  
13  
14  
15  
16  
17  
18  
19  
20  
21  
22  
23  
24  
25  
26  
27  
28  
29  
30  
31  
32  
33  
34  
35  
36  
37  
38  
39  
40  
41  
42  
43  
44  
45  
46  
47  
48  
49  
50  
51  
52  
53  
54  
55  
56  
57  
58  
59  
60

For peer review only

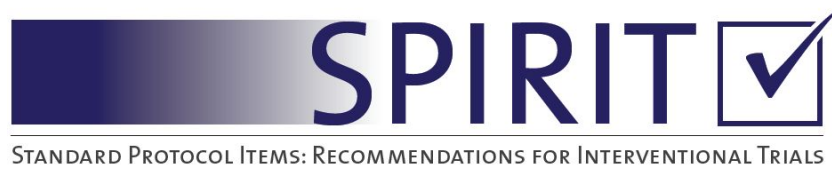

SPIRIT 2013 Checklist: Recommended items to address in a clinical trial protocol and related documents\*

| Section/item                      | ItemNo | Description                                                                                                                                                                                                                                                                              | Page  |
|-----------------------------------|--------|------------------------------------------------------------------------------------------------------------------------------------------------------------------------------------------------------------------------------------------------------------------------------------------|-------|
| <b>Administrative information</b> |        |                                                                                                                                                                                                                                                                                          |       |
| Title                             | 1      | Descriptive title identifying the study design, population, interventions, and, if applicable, trial acronym                                                                                                                                                                             | P1    |
| Trial registration                | 2a     | Trial identifier and registry name. If not yet registered, name of intended registry                                                                                                                                                                                                     | P2/10 |
|                                   | 2b     | All items from the World Health Organization Trial Registration Data Set                                                                                                                                                                                                                 | NA    |
| Protocol version                  | 3      | Date and version identifier                                                                                                                                                                                                                                                              | P10   |
| Funding                           | 4      | Sources and types of financial, material, and other support                                                                                                                                                                                                                              | P14   |
| Roles and responsibilities        | 5a     | Names, affiliations, and roles of protocol contributors                                                                                                                                                                                                                                  | P14   |
|                                   | 5b     | Name and contact information for the trial sponsor                                                                                                                                                                                                                                       | P14   |
|                                   | 5c     | Role of study sponsor and funders, if any, in study design; collection, management, analysis, and interpretation of data; writing of the report; and the decision to submit the report for publication, including whether they will have ultimate authority over any of these activities | P14   |
|                                   | 5d     | Composition, roles, and responsibilities of the coordinating centre, steering committee, endpoint adjudication committee, data management team, and other individuals or groups overseeing the trial, if applicable (see Item 21a for data monitoring committee)                         | P14   |
| <b>Introduction</b>               |        |                                                                                                                                                                                                                                                                                          |       |
| Background and rationale          | 6a     | Description of research question and justification for undertaking the trial, including summary of relevant studies (published and unpublished) examining benefits and harms for each intervention                                                                                       | P3-4  |

|    |                                                           |     |                                                          |          |
|----|-----------------------------------------------------------|-----|----------------------------------------------------------|----------|
| 1  |                                                           |     |                                                          |          |
| 2  |                                                           | 6b  | Explanation for choice of comparators                    | NA       |
| 3  |                                                           |     |                                                          |          |
| 4  | Objectives                                                | 7   | Specific objectives or hypotheses                        | P4       |
| 5  |                                                           |     |                                                          |          |
| 6  | Trial design                                              | 8   | Description of trial design including type of trial (eg, | P4       |
| 7  |                                                           |     | parallel group, crossover, factorial, single group),     |          |
| 8  |                                                           |     | allocation ratio, and framework (eg, superiority,        |          |
| 9  |                                                           |     | equivalence, noninferiority, exploratory)                |          |
| 10 |                                                           |     |                                                          |          |
| 11 |                                                           |     |                                                          |          |
| 12 | <b>Methods: Participants, interventions, and outcomes</b> |     |                                                          |          |
| 13 |                                                           |     |                                                          |          |
| 14 | Study setting                                             | 9   | Description of study settings (eg, community clinic,     | P5       |
| 15 |                                                           |     | academic hospital) and list of countries where data      |          |
| 16 |                                                           |     | will be collected. Reference to where list of study      |          |
| 17 |                                                           |     | sites can be obtained                                    |          |
| 18 |                                                           |     |                                                          |          |
| 19 | Eligibility criteria                                      | 10  | Inclusion and exclusion criteria for participants. If    | P5/16-21 |
| 20 |                                                           |     | applicable, eligibility criteria for study centres and   |          |
| 21 |                                                           |     | individuals who will perform the interventions (eg,      |          |
| 22 |                                                           |     | surgeons, psychotherapists)                              |          |
| 23 |                                                           |     |                                                          |          |
| 24 |                                                           |     |                                                          |          |
| 25 | Interventions                                             | 11a | Interventions for each group with sufficient detail to   | P5-6     |
| 26 |                                                           |     | allow replication, including how and when they will      |          |
| 27 |                                                           |     | be administered                                          |          |
| 28 |                                                           |     |                                                          |          |
| 29 |                                                           |     |                                                          |          |
| 30 |                                                           | 11b | Criteria for discontinuing or modifying allocated        | P6       |
| 31 |                                                           |     | interventions for a given trial participant (eg, drug    |          |
| 32 |                                                           |     | dose change in response to harms, participant            |          |
| 33 |                                                           |     | request, or improving/worsening disease)                 |          |
| 34 |                                                           |     |                                                          |          |
| 35 |                                                           | 11c | Strategies to improve adherence to intervention          | P6       |
| 36 |                                                           |     | protocols, and any procedures for monitoring             |          |
| 37 |                                                           |     | adherence (eg, drug tablet return, laboratory tests)     |          |
| 38 |                                                           |     |                                                          |          |
| 39 |                                                           |     |                                                          |          |
| 40 |                                                           | 11d | Relevant concomitant care and interventions that         | P6       |
| 41 |                                                           |     | are permitted or prohibited during the trial             |          |
| 42 |                                                           |     |                                                          |          |
| 43 | Outcomes                                                  | 12  | Primary, secondary, and other outcomes, including        | P6-7     |
| 44 |                                                           |     | the specific measurement variable (eg, systolic          |          |
| 45 |                                                           |     | blood pressure), analysis metric (eg, change from        |          |
| 46 |                                                           |     | baseline, final value, time to event), method of         |          |
| 47 |                                                           |     | aggregation (eg, median, proportion), and time point     |          |
| 48 |                                                           |     | for each outcome. Explanation of the clinical            |          |
| 49 |                                                           |     | relevance of chosen efficacy and harm outcomes is        |          |
| 50 |                                                           |     | strongly recommended                                     |          |
| 51 |                                                           |     |                                                          |          |
| 52 |                                                           |     |                                                          |          |
| 53 | Participant                                               | 13  | Time schedule of enrolment, interventions (including     | P7       |
| 54 | timeline                                                  |     | any run-ins and washouts), assessments, and visits       |          |
| 55 |                                                           |     | for participants. A schematic diagram is highly          |          |
| 56 |                                                           |     | recommended (see Figure)                                 |          |
| 57 |                                                           |     |                                                          |          |
| 58 |                                                           |     |                                                          |          |
| 59 |                                                           |     |                                                          |          |
| 60 |                                                           |     |                                                          |          |

|   |             |    |                                                    |    |
|---|-------------|----|----------------------------------------------------|----|
| 1 |             |    |                                                    |    |
| 2 | Sample size | 14 | Estimated number of participants needed to achieve | P8 |
| 3 |             |    | study objectives and how it was determined,        |    |
| 4 |             |    | including clinical and statistical assumptions     |    |
| 5 |             |    | supporting any sample size calculations            |    |
| 6 |             |    |                                                    |    |
| 7 | Recruitment | 15 | Strategies for achieving adequate participant      | P8 |
| 8 |             |    | enrolment to reach target sample size              |    |
| 9 |             |    |                                                    |    |

### Methods: Assignment of interventions (for controlled trials)

#### Allocation:

|    |                |     |                                                          |    |
|----|----------------|-----|----------------------------------------------------------|----|
| 14 | Sequence       | 16a | Method of generating the allocation sequence (eg,        | NA |
| 15 | generation     |     | computer-generated random numbers), and list of          |    |
| 16 |                |     | any factors for stratification. To reduce predictability |    |
| 17 |                |     | of a random sequence, details of any planned             |    |
| 18 |                |     | restriction (eg, blocking) should be provided in a       |    |
| 19 |                |     | separate document that is unavailable to those who       |    |
| 20 |                |     | enrol participants or assign interventions               |    |
| 21 |                |     |                                                          |    |
| 22 |                |     |                                                          |    |
| 23 |                |     |                                                          |    |
| 24 | Allocation     | 16b | Mechanism of implementing the allocation sequence        | NA |
| 25 | concealment    |     | (eg, central telephone; sequentially numbered,           |    |
| 26 | mechanism      |     | opaque, sealed envelopes), describing any steps to       |    |
| 27 |                |     | conceal the sequence until interventions are             |    |
| 28 |                |     | assigned                                                 |    |
| 29 |                |     |                                                          |    |
| 30 |                |     |                                                          |    |
| 31 | Implementation | 16c | Who will generate the allocation sequence, who will      | NA |
| 32 |                |     | enrol participants, and who will assign participants     |    |
| 33 |                |     | to interventions                                         |    |
| 34 |                |     |                                                          |    |
| 35 | Blinding       | 17a | Who will be blinded after assignment to                  | NA |
| 36 | (masking)      |     | interventions (eg, trial participants, care providers,   |    |
| 37 |                |     | outcome assessors, data analysts), and how               |    |
| 38 |                |     |                                                          |    |
| 39 |                |     |                                                          |    |
| 40 |                | 17b | If blinded, circumstances under which unblinding is      | NA |
| 41 |                |     | permissible, and procedure for revealing a               |    |
| 42 |                |     | participant's allocated intervention during the trial    |    |
| 43 |                |     |                                                          |    |

### Methods: Data collection, management, and analysis

|    |                 |     |                                                        |    |
|----|-----------------|-----|--------------------------------------------------------|----|
| 46 | Data collection | 18a | Plans for assessment and collection of outcome,        | P7 |
| 47 | methods         |     | baseline, and other trial data, including any related  |    |
| 48 |                 |     | processes to promote data quality (eg, duplicate       |    |
| 49 |                 |     | measurements, training of assessors) and a             |    |
| 50 |                 |     | description of study instruments (eg, questionnaires,  |    |
| 51 |                 |     | laboratory tests) along with their reliability and     |    |
| 52 |                 |     | validity, if known. Reference to where data collection |    |
| 53 |                 |     | forms can be found, if not in the protocol             |    |
| 54 |                 |     |                                                        |    |
| 55 |                 |     |                                                        |    |
| 56 |                 |     |                                                        |    |
| 57 |                 |     |                                                        |    |
| 58 |                 |     |                                                        |    |
| 59 |                 |     |                                                        |    |
| 60 |                 |     |                                                        |    |

|    |                            |     |                                                           |    |
|----|----------------------------|-----|-----------------------------------------------------------|----|
| 1  |                            |     |                                                           |    |
| 2  |                            | 18b | Plans to promote participant retention and complete       | P7 |
| 3  |                            |     | follow-up, including list of any outcome data to be       |    |
| 4  |                            |     | collected for participants who discontinue or deviate     |    |
| 5  |                            |     | from intervention protocols                               |    |
| 6  |                            |     |                                                           |    |
| 7  | Data                       | 19  | Plans for data entry, coding, security, and storage,      | P7 |
| 8  | management                 |     | including any related processes to promote data           |    |
| 9  |                            |     | quality (eg, double data entry; range checks for data     |    |
| 10 |                            |     | values). Reference to where details of data               |    |
| 11 |                            |     | management procedures can be found, if not in the         |    |
| 12 |                            |     | protocol                                                  |    |
| 13 |                            |     |                                                           |    |
| 14 |                            |     |                                                           |    |
| 15 | Statistical                | 20a | Statistical methods for analysing primary and             | P8 |
| 16 | methods                    |     | secondary outcomes. Reference to where other              |    |
| 17 |                            |     | details of the statistical analysis plan can be found, if |    |
| 18 |                            |     | not in the protocol                                       |    |
| 19 |                            |     |                                                           |    |
| 20 |                            |     |                                                           |    |
| 21 |                            | 20b | Methods for any additional analyses (eg, subgroup         | P8 |
| 22 |                            |     | and adjusted analyses)                                    |    |
| 23 |                            |     |                                                           |    |
| 24 |                            | 20c | Definition of analysis population relating to protocol    | P8 |
| 25 |                            |     | non-adherence (eg, as randomised analysis), and           |    |
| 26 |                            |     | any statistical methods to handle missing data (eg,       |    |
| 27 |                            |     | multiple imputation)                                      |    |
| 28 |                            |     |                                                           |    |
| 29 |                            |     |                                                           |    |
| 30 | <b>Methods: Monitoring</b> |     |                                                           |    |
| 31 |                            |     |                                                           |    |
| 32 | Data monitoring            | 21a | Composition of data monitoring committee (DMC);           | P8 |
| 33 |                            |     | summary of its role and reporting structure;              |    |
| 34 |                            |     | statement of whether it is independent from the           |    |
| 35 |                            |     | sponsor and competing interests; and reference to         |    |
| 36 |                            |     | where further details about its charter can be found,     |    |
| 37 |                            |     | if not in the protocol. Alternatively, an explanation of  |    |
| 38 |                            |     | why a DMC is not needed                                   |    |
| 39 |                            |     |                                                           |    |
| 40 |                            |     |                                                           |    |
| 41 |                            | 21b | Description of any interim analyses and stopping          | P8 |
| 42 |                            |     | guidelines, including who will have access to these       |    |
| 43 |                            |     | interim results and make the final decision to            |    |
| 44 |                            |     | terminate the trial                                       |    |
| 45 |                            |     |                                                           |    |
| 46 |                            |     |                                                           |    |
| 47 | Harms                      | 22  | Plans for collecting, assessing, reporting, and           | P8 |
| 48 |                            |     | managing solicited and spontaneously reported             |    |
| 49 |                            |     | adverse events and other unintended effects of trial      |    |
| 50 |                            |     | interventions or trial conduct                            |    |
| 51 |                            |     |                                                           |    |
| 52 |                            |     |                                                           |    |
| 53 | Auditing                   | 23  | Frequency and procedures for auditing trial conduct,      | P8 |
| 54 |                            |     | if any, and whether the process will be independent       |    |
| 55 |                            |     | from investigators and the sponsor                        |    |
| 56 |                            |     |                                                           |    |
| 57 |                            |     |                                                           |    |

## Ethics and dissemination

|    |                   |     |                                                          |     |
|----|-------------------|-----|----------------------------------------------------------|-----|
| 1  |                   |     |                                                          |     |
| 2  | Research ethics   | 24  | Plans for seeking research ethics                        | P9  |
| 3  | approval          |     | committee/institutional review board (REC/IRB)           |     |
| 4  |                   |     | approval                                                 |     |
| 5  |                   |     |                                                          |     |
| 6  | Protocol          | 25  | Plans for communicating important protocol               | P10 |
| 7  | amendments        |     | modifications (eg, changes to eligibility criteria,      |     |
| 8  |                   |     | outcomes, analyses) to relevant parties (eg,             |     |
| 9  |                   |     | investigators, REC/IRBs, trial participants, trial       |     |
| 10 |                   |     | registries, journals, regulators)                        |     |
| 11 |                   |     |                                                          |     |
| 12 |                   |     |                                                          |     |
| 13 | Consent or        | 26a | Who will obtain informed consent or assent from          | P9  |
| 14 | assent            |     | potential trial participants or authorised surrogates,   |     |
| 15 |                   |     | and how (see Item 32)                                    |     |
| 16 |                   |     |                                                          |     |
| 17 |                   |     |                                                          |     |
| 18 |                   | 26b | Additional consent provisions for collection and use     | NA  |
| 19 |                   |     | of participant data and biological specimens in          |     |
| 20 |                   |     | ancillary studies, if applicable                         |     |
| 21 |                   |     |                                                          |     |
| 22 | Confidentiality   | 27  | How personal information about potential and             | P14 |
| 23 |                   |     | enrolled participants will be collected, shared, and     |     |
| 24 |                   |     | maintained in order to protect confidentiality before,   |     |
| 25 |                   |     | during, and after the trial                              |     |
| 26 |                   |     |                                                          |     |
| 27 |                   |     |                                                          |     |
| 28 | Declaration of    | 28  | Financial and other competing interests for principal    | P14 |
| 29 | interests         |     | investigators for the overall trial and each study site  |     |
| 30 |                   |     |                                                          |     |
| 31 | Access to data    | 29  | Statement of who will have access to the final trial     | P14 |
| 32 |                   |     | dataset, and disclosure of contractual agreements        |     |
| 33 |                   |     | that limit such access for investigators                 |     |
| 34 |                   |     |                                                          |     |
| 35 | Ancillary and     | 30  | Provisions, if any, for ancillary and post-trial care,   | NA  |
| 36 | post-trial care   |     | and for compensation to those who suffer harm from       |     |
| 37 |                   |     | trial participation                                      |     |
| 38 |                   |     |                                                          |     |
| 39 |                   |     |                                                          |     |
| 40 | Dissemination     | 31a | Plans for investigators and sponsor to communicate       | P8  |
| 41 | policy            |     | trial results to participants, healthcare professionals, |     |
| 42 |                   |     | the public, and other relevant groups (eg, via           |     |
| 43 |                   |     | publication, reporting in results databases, or other    |     |
| 44 |                   |     | data sharing arrangements), including any                |     |
| 45 |                   |     | publication restrictions                                 |     |
| 46 |                   |     |                                                          |     |
| 47 |                   |     |                                                          |     |
| 48 |                   | 31b | Authorship eligibility guidelines and any intended       | NA  |
| 49 |                   |     | use of professional writers                              |     |
| 50 |                   |     |                                                          |     |
| 51 |                   | 31c | Plans, if any, for granting public access to the full    | NA  |
| 52 |                   |     | protocol, participant-level dataset, and statistical     |     |
| 53 |                   |     | code                                                     |     |
| 54 |                   |     |                                                          |     |
| 55 |                   |     |                                                          |     |
| 56 | <b>Appendices</b> |     |                                                          |     |
| 57 |                   |     |                                                          |     |
| 58 |                   |     |                                                          |     |
| 59 |                   |     |                                                          |     |
| 60 |                   |     |                                                          |     |



|    |                  |    |                                                        |    |
|----|------------------|----|--------------------------------------------------------|----|
| 1  |                  |    |                                                        |    |
| 2  | Informed consent | 32 | Model consent form and other related                   | NA |
| 3  | materials        |    | documentation given to participants and authorised     |    |
| 4  |                  |    | surrogates                                             |    |
| 5  |                  |    |                                                        |    |
| 6  | Biological       | 33 | Plans for collection, laboratory evaluation, and       | NA |
| 7  | specimens        |    | storage of biological specimens for genetic or         |    |
| 8  |                  |    | molecular analysis in the current trial and for future |    |
| 9  |                  |    | use in ancillary studies, if applicable                |    |
| 10 |                  |    |                                                        |    |

11  
12 \*It is strongly recommended that this checklist be read in conjunction with the SPIRIT 2013  
13 Explanation & Elaboration for important clarification on the items. Amendments to the  
14 protocol should be tracked and dated. The SPIRIT checklist is copyrighted by the SPIRIT  
15 Group under the Creative Commons "[Attribution-NonCommercial-NoDerivs 3.0 Unported](#)"  
16 license.  
17  
18  
19  
20  
21  
22  
23  
24  
25  
26  
27  
28  
29  
30  
31  
32  
33  
34  
35  
36  
37  
38  
39  
40  
41  
42  
43  
44  
45  
46  
47  
48  
49  
50  
51  
52  
53  
54  
55  
56  
57  
58  
59  
60

# BMJ Open

## Efficacy and safety of radiotherapy combined with atezolizumab plus bevacizumab in treating hepatocellular carcinoma with portal vein tumor thrombus: A study protocol

|                                 |                                                                                                                                                                                                                                                                                                                                                                                                                                                                                                                                                                                                                                                       |
|---------------------------------|-------------------------------------------------------------------------------------------------------------------------------------------------------------------------------------------------------------------------------------------------------------------------------------------------------------------------------------------------------------------------------------------------------------------------------------------------------------------------------------------------------------------------------------------------------------------------------------------------------------------------------------------------------|
| Journal:                        | <i>BMJ Open</i>                                                                                                                                                                                                                                                                                                                                                                                                                                                                                                                                                                                                                                       |
| Manuscript ID                   | bmjopen-2022-064688.R1                                                                                                                                                                                                                                                                                                                                                                                                                                                                                                                                                                                                                                |
| Article Type:                   | Protocol                                                                                                                                                                                                                                                                                                                                                                                                                                                                                                                                                                                                                                              |
| Date Submitted by the Author:   | 01-Sep-2022                                                                                                                                                                                                                                                                                                                                                                                                                                                                                                                                                                                                                                           |
| Complete List of Authors:       | Wang, Kang; Eastern Hepatobiliary Surgery Hospital<br>Yu, Hong-Ming; Eastern Hepatobiliary Surgery Hospital<br>Xiang, Yan-Jun; Eastern Hepatobiliary Surgery Hospital<br>Cheng, Yu-Qiang; Eastern Hepatobiliary Surgery Hospital<br>Ni, Qian-Zhi; Eastern Hepatobiliary Surgery Hospital; Shanghai Institute of Nutrition and Health Chinese Academy of Sciences<br>Guo, Wei-Xing; Eastern Hepatobiliary Surgery Hospital<br>Shi, Jie; Eastern Hepatobiliary Surgery Hospital<br>Feng, Shuang; Eastern Hepatobiliary Surgery Hospital<br>Zhai, Jian; Eastern Hepatobiliary Surgery Hospital<br>Cheng, Shu-Qun; Eastern Hepatobiliary Surgery Hospital |
| <b>Primary Subject Heading</b>: | Oncology                                                                                                                                                                                                                                                                                                                                                                                                                                                                                                                                                                                                                                              |
| Secondary Subject Heading:      | Oncology                                                                                                                                                                                                                                                                                                                                                                                                                                                                                                                                                                                                                                              |
| Keywords:                       | RADIOTHERAPY, Hepatobiliary tumours < ONCOLOGY, Adult oncology < ONCOLOGY                                                                                                                                                                                                                                                                                                                                                                                                                                                                                                                                                                             |
|                                 |                                                                                                                                                                                                                                                                                                                                                                                                                                                                                                                                                                                                                                                       |

SCHOLARONE™  
Manuscripts

1  
2 **Efficacy and safety of radiotherapy combined with atezolizumab plus bevacizumab in treating**  
3  
4 **hepatocellular carcinoma with portal vein tumor thrombus: A study protocol**  
5  
6

7 **Short running title:** Radiotherapy plus T+A for HCC with PVTT  
8  
9

10  
11 Kang Wang<sup>1</sup>, Hong-Ming Yu<sup>1</sup>, Yan-Jun Xiang<sup>1</sup>, Yu-Qiang Cheng<sup>1</sup>, Qian-Zhi Ni<sup>1,2</sup>, Wei-Xing Guo<sup>1</sup>,  
12  
13 Jie Shi<sup>1</sup>, Shuang Feng<sup>3</sup>, Jian Zhai<sup>4</sup>, Shu-Qun Cheng<sup>1\*</sup>  
14  
15

16  
17 <sup>1</sup>Department of Hepatic Surgery VI, Eastern Hepatobiliary Surgery Hospital, Naval Medical  
18  
19 University, Shanghai, China  
20  
21

22  
23 <sup>2</sup>CAS Key Laboratory of Nutrition, Metabolism and Food Safety, Shanghai Institute of Nutrition and  
24  
25 Health, University of Chinese Academy of Sciences, Chinese Academy of Sciences, 200031,  
26  
27 Shanghai, China  
28  
29

30  
31 <sup>3</sup>Department of Radiotherapy, Eastern Hepatobiliary Surgery Hospital, Naval Medical University  
32  
33 Shanghai, China  
34  
35

36  
37 <sup>4</sup>Department II of Interventional Radiology, Eastern Hepatobiliary Surgery Hospital, Naval Medical  
38  
39 University, Shanghai, China  
40  
41

42 **\*Correspondence author:**  
43  
44

45  
46 Shu-Qun Cheng, M.D. Eastern Hepatobiliary Surgery Hospital, Naval Medical University, 225  
47  
48 Changhai Road, Shanghai, 200433 China  
49  
50

51  
52 Phone: (86) 21- 8187525  
53  
54

55  
56 Fax: (86) 21-65562400  
57  
58

59  
60 E-mail: [chengshuqun@smmu.edu.cn](mailto:chengshuqun@smmu.edu.cn)

## Abstract

**Introduction:** Vascular invasion and metastasis are poor prognostic factors in patients with hepatocellular carcinoma (HCC). The efficacy of available therapeutic regimens for unresectable HCC is not satisfactory in HCC with portal vein tumor thrombosis (PVTT). Therefore, this open-label, single-arm phase II clinical trial aims to investigate the efficacy and safety of radiotherapy combined with atezolizumab plus bevacizumab in treating HCC patients with PVTT.

**Methods and analysis:** We plan to enroll patients diagnosed with unresectable hepatocellular carcinoma complicated by PVTT. Intensity-modulated radiotherapy (IMRT) combined with atezolizumab plus bevacizumab will be administered for treatment. Patients will initially receive radiotherapy, with each IMRT cycle lasting for 28 days and the total dose of tumor (DT) of 40 Gy/20 f/26 d. CT scan will be performed again, and the treatment plan will be reformulated after field constriction. The treatment will continue until the total DT is up to 54-56 Gy/27-28 f. The treatment with atezolizumab plus bevacizumab will be started at  $3\pm 1$  d after the initiation of radiotherapy and will continue until unacceptable toxicity or disease progression. The primary endpoint is objective response rate (ORR), while the secondary endpoints include overall survival, disease control rate, progression-free survival, time to progression, duration of response, and the rate of surgical conversions. Assuming an ORR of 47%, with a two-sided alpha error of 0.1, 90% power, and a 10% dropout rate, the required number of evaluable patients is 42.

**Ethics and dissemination:** This study will be conducted according to the standards of Good Clinical Practice and in compliance with the principles of the Declaration of Helsinki. The Ethics Committee of our Hospital has approved the protocol (EHBHKY2021-K-017). All participants are required to provide written informed consent. The results of the trial will be published in peer-reviewed journals and presented at international conferences.

**Registration details:** ChiCTR.org, registration number: ChiCTR2100049831.

1  
2 **Keywords:** *Hepatocellular carcinoma, portal vein tumor thrombus, radiotherapy, atezolizumab,*  
3  
4 *bevacizumab*

5  
6  
7  
8 **Strengths and limitations of this study**  
9

- 10  
11 ● This study was a single-arm trial without a control group.  
12  
13 ● This study is an exploratory trial with a small sample size.  
14  
15 ● The conclusions of this study may serve as preliminary evidence for subsequent large-scale,  
16  
17 randomized, controlled clinical trials.  
18  
19

20  
21  
22  
23  
24  
25 **Introduction**  
26

27  
28 Liver cancer is the seventh most common cancer and the second most deadly cancer, with more than  
29  
30 900,000 new cases being diagnosed worldwide every year.<sup>1</sup> In China, the age-standardized annual  
31  
32 incidence of liver cancer is about 26.67/100,000,<sup>2</sup> while the 5-year survival rate is only around 12%.<sup>3</sup>  
33  
34 Hepatocellular carcinoma (HCC) is the most common histological subtype of primary liver cancer,<sup>4</sup>  
35  
36 and surgery is the preferred and most efficacious approach for the treatment of HCC. However, some  
37  
38 patients lose the chance for surgery at the time of diagnosis due to their intermediate to advanced  
39  
40 tumors, liver dysfunction, etc. <sup>5</sup> Local therapies (including radiotherapy) and systemic therapies are  
41  
42 important options for prolonging the survival of HCC patients who cannot undergo surgical resection.  
43  
44 Due to the promising antitumor activity and favorable safety profile in the IMbrave150 trial, with the  
45  
46 mortality risk being decreased by 42% compared with sorafenib,<sup>6</sup> atezolizumab plus bevacizumab  
47  
48 have become the standard first-line therapy for unresectable HCC. Yet, the objective response rate  
49  
50 (ORR) with atezolizumab plus bevacizumab in unresectable HCC patients was reported to be only  
51  
52 27.3%.<sup>6</sup> Hence, improving the therapeutic effect in patients is still a great clinical challenge.  
53  
54  
55  
56  
57  
58  
59  
60

1  
2 Vascular invasion and metastasis are commonly seen in patients with intermediate to advanced-stage  
3  
4 HC, as 44%-62% of patients with advanced HCC have been reported to develop portal vein tumor  
5  
6 thrombosis (PVTT).<sup>7</sup> In addition, the range and severity of PVTT have been significantly associated  
7  
8 with the prognosis of unresectable HCC patients, with the median overall survival being just 2.7 to 4  
9  
10 months in naive HCC patients with PVTT.<sup>8</sup> However, there are significant differences between  
11  
12 eastern and western countries in the treatment strategies used for HCC patients with PVTT.<sup>9</sup>  
13  
14 Guidelines from western countries argue that HCC complicated with PVTT represents the advanced  
15  
16 stage of HCC, advocating sorafenib as the only treatment option.<sup>10-12</sup> On the contrary, eastern  
17  
18 countries adopt positive strategies, such as surgical resection, radiotherapy, transcatheter arterial  
19  
20 chemoembolization (TACE), and surgery combined with multidisciplinary therapies, which are  
21  
22 expected to improve the long-term survival of these patients.<sup>13-16</sup>  
23  
24  
25  
26  
27

28 Radiotherapy is recommended for unresectable HCC patients with types I, II, and III PVTT, whose  
29  
30 liver function is graded as Child-Pugh A and B. In addition, previous studies have shown that  
31  
32 radiotherapy can synergistically enhance the antitumor effect of immunotherapy and targeted therapy  
33  
34 by changing the tumor microenvironment.<sup>17 18</sup> At present, radiotherapy combined with  
35  
36 immunotherapy and targeted therapy is currently one of the dominant research topics within the tumor  
37  
38 area. A number of studies have also suggested that radiotherapy combined with sorafenib alone  
39  
40 improves OS in patients with HCC complicated by PVTT,<sup>19</sup> and the feasibility of concurrent  
41  
42 radiotherapy and sorafenib.<sup>20 21</sup> In addition, the results of a previous retrospective study showed that  
43  
44 radiotherapy combined with atezolizumab plus bevacizumab was feasible in unresectable HCC.<sup>22</sup>  
45  
46 However, whether the combination of radiotherapy and immunotherapy plus targeted therapy can  
47  
48 improve the efficacy in patients with HCC complicated by PVTT needs to be further verified.  
49  
50  
51  
52  
53

54 Therefore, we proposed an open-label, multicenter, single-arm phase II clinical trial. Patients  
55  
56 diagnosed with locally advanced or metastatic and/or unresectable HCC complicated with PVTT will  
57  
58 be preliminarily enrolled to explore the efficacy and safety of radiotherapy combined with  
59  
60

1  
2 atezolizumab plus bevacizumab, which is expected to provide an efficacious therapeutic regimen for  
3  
4 HCC patients with PVTT and further improve the treatment response and prognosis. Here, we present  
5  
6 the protocol in accordance with the SPIRIT reporting checklist.  
7  
8  
9

## 10 **Methods and analysis**

### 11 12 13 **Study design and objective**

14  
15  
16  
17 This open-label, multicenter, single-arm clinical trial will enroll patients diagnosed with locally  
18  
19 advanced or metastatic and/or unresectable HCC complicated with PVTT from the departments of  
20  
21 hepatobiliary surgery of our Hospitals between August 2021 and December 2021 so as to initially  
22  
23 exploring the efficacy and safety of radiotherapy combined with atezolizumab plus bevacizumab in  
24  
25 naive patients with unresectable HCC complicated by PVTT.  
26  
27  
28

### 29 **Eligibility criteria**

30  
31  
32  
33 The key inclusion criteria are as follows: 1) Males or non-pregnant females aged between 18 and 70  
34  
35 years old; 2) Signed informed consent form; 3) Able to comply with the study protocol according to  
36  
37 the investigator's judgment; 4) Histologically, cytologically or clinically diagnosed with  
38  
39 hepatocellular carcinoma (HCC); 5) Confirmed portal vein tumor thrombus by imaging findings; 6)  
40  
41 Not suitable for radical surgical treatment; 7) Have not received any antitumor treatment; 8) At least  
42  
43 one measurable untreated lesion (per RECIST 1.1); 9) Pre-treatment tumor tissue sample (if available);  
44  
45 10) ECOG Performance Status of 0 or 1 within 7 days prior to initiation of study treatment; 11) Child-  
46  
47 Pugh class A within 7 days prior to initiation of study treatment; 12) Adequate hematologic and organ  
48  
49 functions, based on the following laboratory test results obtained within 7 days prior to initiation of  
50  
51 study treatment; 13) Resolution of any acute, clinically significant treatment-related toxicity from  
52  
53 prior therapy to grade < 1 prior to study entry, with the exception of alopecia; 14) Negative HIV test  
54  
55 at screening.  
56  
57  
58  
59  
60

1  
2 The key exclusion criteria are as follows: 1) History of the leptomenigeal disease; 2) Active or  
3  
4 history of autoimmune disease or immune deficiency; 3) History of idiopathic pulmonary fibrosis,  
5  
6 organizing pneumonia (e.g., bronchiolitis obliterans), drug-induced pneumonitis, or idiopathic  
7  
8 pneumonitis, or evidence of active pneumonitis on screening chest computed tomography (CT) scan.  
9  
10 History of radiation pneumonitis in the radiation field (fibrosis) is permitted; 4) Active tuberculosis;  
11  
12  
13 5) Significant cardiovascular disease (such as New York Heart Association Class II or greater cardiac  
14  
15 disease, myocardial infarction, or cerebrovascular accident) within 3 months prior to initiation of  
16  
17 study treatment, unstable arrhythmia, or unstable angina; 6) History of congenital long QT syndrome  
18  
19 or corrected QT interval > 500 ms (calculated with the use of the Fridericia method) at screening; 7)  
20  
21 History of uncorrectable electrolyte disorder affecting serum levels of potassium, calcium, or  
22  
23 magnesium; 8) The major surgical procedure, other than for diagnosis, within 4 weeks prior to  
24  
25 initiation of study treatment, or anticipation of the need for a major surgical procedure during the  
26  
27 study; 9) History of malignancy other than HCC within 5 years prior to screening; 10) Severe  
28  
29 infection within 4 weeks prior to initiation of study treatment; 11) Treatment with therapeutic oral or  
30  
31 intravenous antibiotics within 2 weeks prior to initiation of study treatment; 12) Prior allogeneic stem  
32  
33 cell or solid organ transplantation; 13) Untreated or incompletely treated esophageal and/or gastric  
34  
35 varices that are bleeding or have a high risk for bleeding; 15) Co-infection of HBV and HCV; 16)  
36  
37 Symptomatic, untreated, or actively progressing central nervous system (CNS) metastases.  
38  
39  
40  
41  
42  
43  
44

### 45 **Treatment plan**

46  
47 Patients will initially receive intensity-modulated radiotherapy (IMRT) with each cycle for 28 days.  
48  
49 A treatment plan will be established after CT location. The clinical target volume (CTV) includes  
50  
51 tumors and tumor thrombi. The planning target volume (PTV) will be expanded by 0.5-1.0 cm, with  
52  
53 conventional fractionation at a single dose of 180-220 cGy. Total DT will be 40 Gy/20 f/26 d. CT  
54  
55 scan will be performed at the end of every cycle, and the treatment plan will be reformulated after  
56  
57 field constriction. The treatment will continue until the total DT is up to 54-56 Gy/27-28 f.  
58  
59  
60



1  
2 The treatment with atezolizumab plus bevacizumab will be started at  $3\pm 1$  d after the initiation of  
3  
4 IMRT. Each treatment cycle will last for 21 days. On the first day of each cycle, atezolizumab  
5  
6 injection will be intravenously administered at a fixed dose of 1,200 mg (initial intravenous injection  
7  
8 for 60 min, and subsequent intravenous injections for 30 min if well-tolerated). Bevacizumab at a  
9  
10 dose of 15 mg/kg will be intravenously administered at least 5 min apart (initial intravenous injection  
11  
12 for 90 min, and subsequent intravenous injections reduced to 60 min and 30 min if well-tolerated).  
13  
14 The treatment was discontinued when there was no additional clinical benefit, as judged by the  
15  
16 investigator (based on imaging, biochemical indicators, and clinical status of the patient). Then, the  
17  
18 patient received the guideline-recommended second-line therapy.  
19  
20  
21  
22

23  
24 Delayed treatment or dose reduction will be determined by the clinical team, and the specific  
25  
26 adjustment plan will be determined by the investigator based on the patient's clinical condition. In  
27  
28 case of severe toxicity, the administration will be delayed, and/or the dose will be reduced. If any  
29  
30 serious adverse event (SAE) occurs during the radiotherapy, or the radiotherapy is delayed for more  
31  
32 than 4 weeks for any reason, radiotherapy sessions will be terminated. The doses of atezolizumab and  
33  
34 bevacizumab will be adjusted according to the drug's instructions.  
35  
36  
37

## 38 39 **Endpoints**

40  
41  
42 The primary endpoint is ORR, which is defined as the proportion of patients with Complete Response  
43  
44 (CR) and Partial Response (PR). CR or PR is assessed in accordance with Response  
45  
46 Evaluation Criteria In Solid Tumors (RECIST) 1.1. The responses will be independently evaluated  
47  
48 by three to six experienced senior physicians who are not investigators in this study.  
49  
50  
51

52  
53 Secondary endpoints include (1) OS, defined as the time between the first study treatment and  
54  
55 death (for any reason). (2) Disease control rate (DCR), defined as the percentage of subjects with the  
56  
57 best response as CR, PR, or stable disease (SD). (3) Progression-free survival (PFS), defined as the  
58  
59 time between the first treatment and the first tumor progression or appearance of a new lesion or death  
60

1  
2 due to any cause, whichever occurs first. (4) Time to progression (TTP), defined as the time between  
3  
4 the first treatment to first tumor progression. (5) Duration of response (DOR), defined as the time  
5  
6 from first tumor remission to first tumor progression or death due to any cause. The DCRs, PFSs,  
7  
8 TTPs, and DORs will be calculated in accordance with the RECIST version 1.1, modified RECIST  
9  
10 (mRECIST), and immune-modified RECIST (imRECIST), respectively. (6) The rate of surgical  
11  
12 conversions is defined as the proportion of subjects who receive the study treatment and are assessed  
13  
14 to be viable for surgical resection. The resectability criteria include successful down-staging of the  
15  
16 tumor, sufficient future liver remnant (FLR), and technically resectable assessed by the investigator.  
17  
18 The definition of successful downstaging was based on the CSCO guideline, which was 1) stage Ia,  
19  
20 Ib, and IIa, 2) IIb, if the tumor is confined to the same segment or the same side of the liver or  
21  
22 intraoperative radiofrequency ablation can be performed at the same time to treat the lesions outside  
23  
24 the resection range, and 3) IIIa/b, if the tumor is confined to the hemi-liver, and it is expected that the  
25  
26 tumor thrombus can be completely removed during the operation, surgical resection of the tumor and  
27  
28 thrombectomy through the portal vein can be considered.  
29  
30  
31  
32  
33  
34

35 Adverse events (AEs) are assessed in accordance with the NCI Common Terminology Criteria for  
36  
37 Adverse Events (CTCAE V5.0). Monitoring will be performed from the date on which the patient  
38  
39 signs the informed consent to 90 days after the last treatment.  
40  
41  
42

43 Biomarkers for exploratory endpoints include metagenomic sequencing of fecal organisms, five gene  
44  
45 indexes of hepatocellular carcinoma (HN1, RAN, RAMP3, KRT19, TAF9), immune correlation  
46  
47 detection (programmed death-ligand 1 [PD-L1] expression, CD8 expression; microsatellite instability  
48  
49 [MSI], and tumor mutational burden [TMB], immune-related gene expression, RNA-seq) and other  
50  
51 checkpoint proteins and cell surface markers.  
52  
53  
54

## 55 56 **Participant timeline**

57  
58  
59  
60

1  
2 **Table 1** lists the time points for assessing efficacy, adverse events, laboratory safety assessments  
3  
4 (hematology, coagulation, and chemistry), physical examination, electrocardiogram (ECG), and  
5  
6 tumor measurements.  
7  
8  
9  
10  
11  
12  
13  
14  
15  
16  
17  
18  
19  
20  
21  
22  
23  
24  
25  
26  
27  
28  
29  
30  
31  
32  
33  
34  
35  
36  
37  
38  
39  
40  
41  
42  
43  
44  
45  
46  
47  
48  
49  
50  
51  
52  
53  
54  
55  
56  
57  
58  
59  
60

For peer review only

**Table 1.** Schema of Single-arm Clinical Trial

| Item                              | Screening Period |         | Treatment Period                          |                                           |          | Perioperative Period | End of Trial           | Survival Follow-up |
|-----------------------------------|------------------|---------|-------------------------------------------|-------------------------------------------|----------|----------------------|------------------------|--------------------|
|                                   | -28 - 0d         | -7 - 0d | 4 weeks after the first treatment session | 7 weeks after the first treatment session | n cycles |                      | 30 days after checkout |                    |
| <b>Window period (days)</b>       | —                | —       |                                           |                                           |          |                      | ±7                     |                    |
| <b>Informed consent</b>           | ×                |         |                                           |                                           |          |                      |                        |                    |
| <b>Demographics</b>               |                  |         |                                           |                                           |          |                      |                        |                    |
| <b>Past medical history</b>       | ×                |         |                                           |                                           |          |                      |                        |                    |
| <b>History of tumor treatment</b> |                  |         |                                           |                                           |          |                      |                        |                    |
| <b>Physical examination</b>       |                  | ×       | ×                                         | Every 3 weeks                             |          | ×                    | ×                      |                    |
| <b>Vital signs</b>                |                  | ×       | ×                                         | Every 3 weeks                             |          | ×                    | ×                      |                    |
| <b>ECOG</b>                       |                  | ×       | ×                                         | Every 3 weeks                             |          |                      | ×                      |                    |
| <b>Pregnancy test</b>             |                  | ×       |                                           |                                           |          |                      | ×                      |                    |
| <b>Infection screening</b>        | ×                |         |                                           |                                           |          |                      | ×                      |                    |
| <b>Imaging</b>                    | ×                |         | ×                                         | Every 6 weeks                             |          |                      | ×                      | ×                  |
| <b>Tumor markers</b>              |                  | ×       | ×                                         | Every 6 weeks                             |          |                      | ×                      |                    |
| <b>Echocardiography</b>           | ×                |         |                                           |                                           |          |                      | ×                      |                    |
| <b>Tumor tissue</b>               | ×                |         |                                           |                                           |          |                      |                        |                    |
| <b>12-lead electrocardiogram</b>  |                  | ×       | When clinically indicated                 |                                           |          |                      | ×                      |                    |
| <b>Blood biochemistry</b>         |                  | ×       | ×                                         | Every 3 weeks                             |          |                      | ×                      |                    |
| <b>Routine blood test</b>         |                  | ×       | ×                                         | Every 3 weeks                             |          |                      | ×                      |                    |

|    |                                     |   |   |   |               |  |  |   |   |
|----|-------------------------------------|---|---|---|---------------|--|--|---|---|
| 1  |                                     |   |   |   |               |  |  |   |   |
| 2  |                                     |   |   |   |               |  |  |   |   |
| 3  |                                     |   |   |   |               |  |  |   |   |
| 4  | <b>Routine urine test</b>           | × | × |   | Every 3 weeks |  |  |   | × |
| 5  |                                     |   |   |   |               |  |  |   |   |
| 6  | <b>Routine stool test</b>           | × | × |   | Every 3 weeks |  |  |   | × |
| 7  |                                     |   |   |   |               |  |  |   |   |
| 8  | <b>Thyroid function, pituitary</b>  |   |   |   |               |  |  |   |   |
| 9  |                                     | × | × |   | Every 3 weeks |  |  |   | × |
| 10 | <b>function, coagulation</b>        |   |   |   |               |  |  |   |   |
| 11 | <b>Gut microbiome testing for</b>   |   |   |   |               |  |  |   |   |
| 12 |                                     | × |   |   | ×             |  |  |   | × |
| 13 | <b>the stool sample</b>             |   |   |   |               |  |  |   |   |
| 14 | <b>Biomarker testing for the</b>    |   |   |   |               |  |  |   |   |
| 15 |                                     | × |   |   | ×             |  |  |   | × |
| 16 | <b>blood sample</b>                 |   |   |   |               |  |  |   |   |
| 17 | <b>Surgical resection</b>           |   |   |   |               |  |  | × |   |
| 18 |                                     |   |   |   |               |  |  |   |   |
| 19 | <b>Surgical complications</b>       |   |   |   |               |  |  | × |   |
| 20 |                                     |   |   |   |               |  |  |   |   |
| 21 | <b>Concomitant medication</b>       | × | × | × | Every 3 weeks |  |  |   | × |
| 22 |                                     |   |   |   |               |  |  |   |   |
| 23 | <b>Adverse events</b>               | × | × | × | Every 3 weeks |  |  |   | × |
| 24 |                                     |   |   |   |               |  |  |   |   |
| 25 | <b>Compliance evaluation</b>        | × | × | × | Every 3 weeks |  |  |   |   |
| 26 |                                     |   |   |   |               |  |  |   |   |
| 27 | <b>Dispensing of drugs</b>          |   |   | × | Every 3 weeks |  |  |   |   |
| 28 |                                     |   |   |   |               |  |  |   |   |
| 29 | <b>Recovery of drugs</b>            |   |   | × | Every 3 weeks |  |  |   | × |
| 30 |                                     |   |   |   |               |  |  |   |   |
| 31 | <b>Follow-up on survival status</b> |   |   |   |               |  |  |   |   |
| 32 |                                     |   |   |   |               |  |  |   |   |
| 33 | <b>and antitumor treatment</b>      |   |   |   |               |  |  |   | × |
| 34 |                                     |   |   |   |               |  |  |   |   |
| 35 |                                     |   |   |   |               |  |  |   |   |
| 36 |                                     |   |   |   |               |  |  |   |   |
| 37 |                                     |   |   |   |               |  |  |   |   |
| 38 |                                     |   |   |   |               |  |  |   |   |
| 39 |                                     |   |   |   |               |  |  |   |   |
| 40 |                                     |   |   |   |               |  |  |   |   |
| 41 |                                     |   |   |   |               |  |  |   |   |
| 42 |                                     |   |   |   |               |  |  |   |   |
| 43 |                                     |   |   |   |               |  |  |   |   |
| 44 |                                     |   |   |   |               |  |  |   |   |
| 45 |                                     |   |   |   |               |  |  |   |   |
| 46 |                                     |   |   |   |               |  |  |   |   |

For peer review only

1  
2 Furthermore, for the testing of biomarkers as exploratory endpoints, stool and blood samples will be  
3  
4 collected from patients prior to the first treatment, at 7 weeks after the first treatment, and after  
5  
6 treatment discontinuation, respectively.  
7  
8  
9

### 10 **Data collection and management**

11  
12  
13 The completed CRFs will be submitted to the respective sites for archiving. All data will be recorded  
14  
15 in an electronic case report form (eCRF) by investigators or clinical research coordinators. All study  
16  
17 documents will be confidential. All study data, including confirmation of all patients (effective check  
18  
19 on recorded information, such as study cases), all original copies of signed ICFs, as well as detailed  
20  
21 original records of drug distribution, shall be kept uniformly by the study institution until 5 years after  
22  
23 the end of the trial.  
24  
25  
26  
27

### 28 **Statistical methods**

29  
30  
31 According to the results of IMbrave150,<sup>6</sup> the ORR of atezolizumab plus bevacizumab in unresectable  
32  
33 HCC patients was 27.3%. Assuming an ORR of 47%, with a two-sided alpha error of 0.1, 90% power,  
34  
35 and 10% dropout rate, the required number of evaluable patients is 42.  
36  
37  
38  
39

40 The efficacy assessment is based on the full analysis set (FAS). The intention-to-treat (ITT) efficacy  
41  
42 analysis will be performed for subjects who received at least one session of the study treatment based  
43  
44 on the FAS. No supplementation will be made for missing values. The safety analysis set (SAS)  
45  
46 includes all enrolled subjects who have received at least one session of study treatment and have a  
47  
48 post-treatment safety record. This dataset will be used for safety analysis.  
49  
50  
51

### 52 **Monitoring**

53  
54  
55 An independent Data and Safety Monitoring Committee has been established to assess the safety data  
56  
57 if serious adverse events occur. Any adverse events will be registered. A qualified and independent  
58  
59 auditor is appointed to audit the trial systems, and the audit will be conducted before and during the  
60

1 study following a written procedure. The stopping rules for the trial are 1) the investigators find  
2 serious safety issues, or 2) the administrative department cancels the trial. The termination of the trial  
3  
4 can be temporary or permanent. When terminating the trial, all records will be kept for future  
5  
6  
7  
8  
9 reference.

## 10 11 12 **Patient and public involvement**

13  
14  
15  
16 The patients and general public were not involved in the trial design.

## 17 18 19 **Discussion**

20  
21  
22 Atezolizumab plus bevacizumab is the standard first-line therapy for unresectable HCC patients.  
23  
24 Although the combination can significantly improve the prognosis in patients, the ORR is still not  
25  
26 satisfactory.<sup>6</sup> Improving the therapeutic effect in patients is still a great clinical challenge. For patients  
27  
28 with HCC, vascular invasion and metastasis are important reasons these patients cannot undergo  
29  
30 surgical resection, as well as poor prognostic factors. Radiotherapy has an important role in treating  
31  
32 patients with PVTT; however, the therapeutic effects are still limited. Previous clinical studies have  
33  
34 shown that radiotherapy combined with targeted therapy, such as sorafenib, tends to prolong the  
35  
36 overall survival of patients with HCC complicated by PVTT. In the meanwhile, a retrospective study  
37  
38 reported the feasibility of radiotherapy combined with atezolizumab plus bevacizumab in  
39  
40 unresectable HCC.<sup>22</sup> However, evidence on whether the combination of radiotherapy with  
41  
42 atezolizumab plus bevacizumab can improve the therapeutic effects in unresectable HCC patients  
43  
44 with PVTT is still warranted. Accordingly, this open-label, multicenter, single-arm clinical trial was  
45  
46 designed to preliminarily explore the efficacy and safety of radiotherapy combined with atezolizumab  
47  
48 plus bevacizumab in naive unresectable HCC patients with PVTT.  
49  
50  
51  
52  
53

54  
55  
56 There are several limitations in the present study that should be considered. First, this is a single-arm  
57  
58 clinical trial without a control group that could be used to compare the efficacy and safety between  
59  
60 treatment regimens. Second, since this study is an exploratory trial with a small sample size, no

1  
2 confirmatory efficacy conclusions can be drawn. The conclusions of this study may serve as  
3  
4 preliminary evidence for subsequent large-scale, randomized, controlled clinical trials.  
5  
6

7  
8 As the prognosis in unresectable HCC patients with PVTT remains poor, there is an urgent need to  
9  
10 find an efficacious and safe therapeutic regimen. In this study, the efficacy and safety of IMRT  
11  
12 combined with atezolizumab plus bevacizumab in native unresectable HCC patients with PVTT will  
13  
14 be investigated so as to explore a new therapeutic regimen and further improve the efficacy and  
15  
16 prognosis in these patients.  
17

### 18 19 20 **Ethics and dissemination**

21  
22  
23 This study will be conducted according to the standards of Good Clinical Practice and in compliance  
24  
25 with the principles of the Declaration of Helsinki. The Ethics Committee of our Hospital has approved  
26  
27 the protocol (EHBHKY2021-K-017). All participants are required to provide written informed  
28  
29 consent. The results of the trial will be published in peer-reviewed journals and presented at  
30  
31 international conferences.  
32  
33

### 34 35 36 **Trial status**

37  
38  
39 The trial has been registered in ChiCTR.org (Registration number: ChiCTR2100049831; registration  
40  
41 date: 2021-08-10; <http://www.chictr.org.cn/showproj.aspx?proj=126593>). Recruitment is ongoing.  
42  
43 The protocol version number is 1.0. The study protocol has been reported in accordance with the  
44  
45 Standard Protocol Items: Recommendations for Clinical Interventional Trials (SPIRIT) guidelines.  
46  
47  
48

### 49 50 **Acknowledgments**

51  
52  
53 The authors would like to thank the patients, their families, and all the investigators who will  
54  
55 participate in the present study.  
56  
57

### 58 59 **Data Sharing Statement**

60



1 We will widely disseminate the results of this clinical trial through conference presentations and  
2 publications in relevant journals. All evaluation forms, reports, and other records will be identified in  
3 a manner designed to maintain participants' confidentiality. All records will be kept in a secure  
4 storage area with limited access. Data during the study are available from the study leader upon  
5 reasonable request.  
6  
7  
8  
9  
10  
11  
12

### 13 **Authors' contributions**

14  
15 Kang Wang and Yan-Jun Xiang drafted the manuscript. Kang Wang, Yan-Jun Xiang, and Hong-Ming  
16 Yu contributed equally to this work. Shu-Qun Cheng, Kang Wang, Yan-Jun Xiang, and Hong-Ming  
17 Yu designed the trial. Yu-Qiang Cheng, Qian-Zhi Ni, Wei-Xing Guo, Jie Shi, Shuang Feng, and Jian  
18 Zhai are responsible for planning the data analysis and analyzing the data resulting from the trial. All  
19 named authors adhere to the authorship guidelines of Trials. All authors have agreed to publication.  
20 All authors read and approved the final manuscript.  
21  
22  
23  
24  
25  
26  
27  
28  
29  
30  
31  
32

### 33 **Funding**

34  
35 This work was supported by the Clinical Research Plan of SHDC (No. SHDC2020CR1004A), the  
36 State Key Program of the National Natural Science Foundation of China (No: 81730097), the  
37 National Natural Science Foundation of China (No: 82072618), and the Science and Technology  
38 Commission Foundation of Shanghai Municipality (No: 19411967300). The Fundings have no roles  
39 in the design of the study and collection, analysis, and interpretation of data and in writing the  
40 manuscript.  
41  
42  
43  
44  
45  
46  
47  
48  
49  
50

### 51 **Conflict of interest**

52  
53  
54  
55 The authors have no conflicts of interest to declare.  
56  
57  
58  
59  
60

## Reference

1. Sung H, Ferlay J, Siegel RL, et al. Global Cancer Statistics 2020: GLOBOCAN Estimates of Incidence and Mortality Worldwide for 36 Cancers in 185 Countries. *CA: a cancer journal for clinicians* 2021;71(3):209-49. doi: 10.3322/caac.21660 [published Online First: 2021/02/05]
2. Zheng R, Qu C, Zhang S, et al. Liver cancer incidence and mortality in China: Temporal trends and projections to 2030. *Chin J Cancer Res* 2018;30(6):571-79. doi: 10.21147/j.issn.1000-9604.2018.06.01
3. Zeng H, Chen W, Zheng R, et al. Changing cancer survival in China during 2003–15: a pooled analysis of 17 population-based cancer registries. *The Lancet Global Health* 2018;6(5):e555-e67. doi: 10.1016/s2214-109x(18)30127-x
4. Craig AJ, von Felden J, Garcia-Lezana T, et al. Tumour evolution in hepatocellular carcinoma. *Nat Rev Gastroenterol Hepatol* 2020;17(3):139-52. doi: 10.1038/s41575-019-0229-4
5. Kudo M, Trevisani F, Abou-Alfa GK, et al. Hepatocellular Carcinoma: Therapeutic Guidelines and Medical Treatment. *Liver Cancer* 2016;6(1):16-26. doi: 10.1159/000449343
6. Finn RS, Qin S, Ikeda M, et al. Atezolizumab plus Bevacizumab in Unresectable Hepatocellular Carcinoma. *N Engl J Med* 2020;382(20):1894-905. doi: 10.1056/NEJMoa1915745
7. Zhang ZM, Lai EC, Zhang C, et al. The strategies for treating primary hepatocellular carcinoma with portal vein tumor thrombus. *Int J Surg* 2015;20:8-16. doi: 10.1016/j.ijssu.2015.05.009
8. Pawarode A, Voravud N, Sriuranpong V, et al. Natural history of untreated primary hepatocellular carcinoma: a retrospective study of 157 patients. *Am J Clin Oncol* 1998;21(4):386-91. doi: 10.1097/00000421-199808000-00014
9. Lu J, Zhang XP, Zhong BY, et al. Management of patients with hepatocellular carcinoma and portal vein tumour thrombosis: comparing east and west. *Lancet Gastroenterol Hepatol* 2019;4(9):721-30. doi: 10.1016/S2468-1253(19)30178-5

10. Heimbach JK, Kulik LM, Finn RS, et al. AASLD guidelines for the treatment of hepatocellular carcinoma. *Hepatology* 2018;67(1):358-80. doi: 10.1002/hep.29086
11. European Association For The Study Of The L, European Organisation For R, Treatment Of C. EASL-EORTC clinical practice guidelines: management of hepatocellular carcinoma. *J Hepatol* 2012;56(4):908-43. doi: 10.1016/j.jhep.2011.12.001
12. Omata M, Lesmana LA, Tateishi R, et al. Asian Pacific Association for the Study of the Liver consensus recommendations on hepatocellular carcinoma. *Hepatol Int* 2010;4(2):439-74. doi: 10.1007/s12072-010-9165-7
13. Yoon SM, Ryoo BY, Lee SJ, et al. Efficacy and Safety of Transarterial Chemoembolization Plus External Beam Radiotherapy vs Sorafenib in Hepatocellular Carcinoma With Macroscopic Vascular Invasion: A Randomized Clinical Trial. *JAMA Oncol* 2018;4(5):661-69. doi: 10.1001/jamaoncol.2017.5847
14. Cheng S, Yang J, Shen F, et al. Multidisciplinary management of hepatocellular carcinoma with portal vein tumor thrombus - Eastern Hepatobiliary Surgical Hospital consensus statement. *Oncotarget* 2016;7(26):40816-29. doi: 10.18632/oncotarget.8386 [published Online First: 2016/10/27]
15. Kudo M, Kawamura Y, Hasegawa K, et al. Management of Hepatocellular Carcinoma in Japan: JSH Consensus Statements and Recommendations 2021 Update. *Liver Cancer* 2021;10(3):181-223. doi: 10.1159/000514174 [published Online First: 2021/07/10]
16. Xie DY, Ren ZG, Zhou J, et al. 2019 Chinese clinical guidelines for the management of hepatocellular carcinoma: updates and insights. *Hepatobiliary Surg Nutr* 2020;9(4):452-63. doi: 10.21037/hbsn-20-480 [published Online First: 2020/08/25]
17. Arina A, Gutiontov SI, Weichselbaum RR. Radiotherapy and Immunotherapy for Cancer: From "Systemic" to "Multisite". *Clin Cancer Res* 2020;26(12):2777-82. doi: 10.1158/1078-0432.CCR-19-2034

- 1  
2 18. Ozpiskin OM, Zhang L, Li JJ. Immune targets in the tumor microenvironment treated by  
3  
4 radiotherapy. *Theranostics* 2019;9(5):1215-31. doi: 10.7150/thno.32648  
5  
6  
7 19. Yu JI, Yoon SM, Park HC, et al. Multicenter validation study of a prognostic index for portal vein  
8  
9 tumor thrombosis in hepatocellular carcinoma. *Cancer Res Treat* 2014;46(4):348-57. doi:  
10  
11 10.4143/crt.2013.142  
12  
13 20. Chen SW, Lin LC, Kuo YC, et al. Phase 2 study of combined sorafenib and radiation therapy in  
14  
15 patients with advanced hepatocellular carcinoma. *Int J Radiat Oncol Biol Phys*  
16  
17 2014;88(5):1041-7. doi: 10.1016/j.ijrobp.2014.01.017 [published Online First: 2014/03/26]  
18  
19  
20 21. Rim CH, Park S, Shin IS, et al. Is the Concurrent Use of Sorafenib and External Radiotherapy  
21  
22 Feasible for Advanced Hepatocellular Carcinoma? A Meta-Analysis. *Cancers (Basel)*  
23  
24 2021;13(12) doi: 10.3390/cancers13122912 [published Online First: 2021/07/03]  
25  
26  
27 22. Manzar GS, De BS, Abana CO, et al. Outcomes and Toxicities of Modern Combined Modality  
28  
29 Therapy with Atezolizumab Plus Bevacizumab and Radiation Therapy for Hepatocellular  
30  
31 Carcinoma. *Cancers (Basel)* 2022;14(8) doi: 10.3390/cancers14081901 [published Online  
32  
33 First: 2022/04/24]  
34  
35  
36  
37  
38  
39  
40  
41  
42  
43  
44  
45  
46  
47  
48  
49  
50  
51  
52  
53  
54  
55  
56  
57  
58  
59  
60

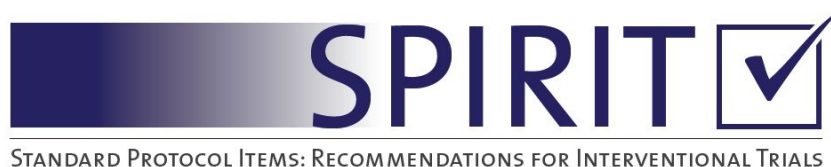

STANDARD PROTOCOL ITEMS: RECOMMENDATIONS FOR INTERVENTIONAL TRIALS

SPIRIT 2013 Checklist: Recommended items to address in a clinical trial protocol and related documents\*

| Section/item                      | ItemNo | Description                                                                                                                                                                                                                                                                              | Page  |
|-----------------------------------|--------|------------------------------------------------------------------------------------------------------------------------------------------------------------------------------------------------------------------------------------------------------------------------------------------|-------|
| <b>Administrative information</b> |        |                                                                                                                                                                                                                                                                                          |       |
| Title                             | 1      | Descriptive title identifying the study design, population, interventions, and, if applicable, trial acronym                                                                                                                                                                             | P1    |
| Trial registration                | 2a     | Trial identifier and registry name. If not yet registered, name of intended registry                                                                                                                                                                                                     | P2/10 |
|                                   | 2b     | All items from the World Health Organization Trial Registration Data Set                                                                                                                                                                                                                 | NA    |
| Protocol version                  | 3      | Date and version identifier                                                                                                                                                                                                                                                              | P10   |
| Funding                           | 4      | Sources and types of financial, material, and other support                                                                                                                                                                                                                              | P14   |
| Roles and responsibilities        | 5a     | Names, affiliations, and roles of protocol contributors                                                                                                                                                                                                                                  | P14   |
|                                   | 5b     | Name and contact information for the trial sponsor                                                                                                                                                                                                                                       | P14   |
|                                   | 5c     | Role of study sponsor and funders, if any, in study design; collection, management, analysis, and interpretation of data; writing of the report; and the decision to submit the report for publication, including whether they will have ultimate authority over any of these activities | P14   |
|                                   | 5d     | Composition, roles, and responsibilities of the coordinating centre, steering committee, endpoint adjudication committee, data management team, and other individuals or groups overseeing the trial, if applicable (see Item 21a for data monitoring committee)                         | P14   |
| <b>Introduction</b>               |        |                                                                                                                                                                                                                                                                                          |       |
| Background and rationale          | 6a     | Description of research question and justification for undertaking the trial, including summary of relevant studies (published and unpublished) examining benefits and harms for each intervention                                                                                       | P3-4  |

|                                                           |     |                                                                                                                                                                                                                                                                                                                                                                                |          |
|-----------------------------------------------------------|-----|--------------------------------------------------------------------------------------------------------------------------------------------------------------------------------------------------------------------------------------------------------------------------------------------------------------------------------------------------------------------------------|----------|
|                                                           | 6b  | Explanation for choice of comparators                                                                                                                                                                                                                                                                                                                                          | NA       |
| Objectives                                                | 7   | Specific objectives or hypotheses                                                                                                                                                                                                                                                                                                                                              | P4       |
| Trial design                                              | 8   | Description of trial design including type of trial (eg, parallel group, crossover, factorial, single group), allocation ratio, and framework (eg, superiority, equivalence, noninferiority, exploratory)                                                                                                                                                                      | P4       |
| <b>Methods: Participants, interventions, and outcomes</b> |     |                                                                                                                                                                                                                                                                                                                                                                                |          |
| Study setting                                             | 9   | Description of study settings (eg, community clinic, academic hospital) and list of countries where data will be collected. Reference to where list of study sites can be obtained                                                                                                                                                                                             | P5       |
| Eligibility criteria                                      | 10  | Inclusion and exclusion criteria for participants. If applicable, eligibility criteria for study centres and individuals who will perform the interventions (eg, surgeons, psychotherapists)                                                                                                                                                                                   | P5/16-21 |
| Interventions                                             | 11a | Interventions for each group with sufficient detail to allow replication, including how and when they will be administered                                                                                                                                                                                                                                                     | P5-6     |
|                                                           | 11b | Criteria for discontinuing or modifying allocated interventions for a given trial participant (eg, drug dose change in response to harms, participant request, or improving/worsening disease)                                                                                                                                                                                 | P6       |
|                                                           | 11c | Strategies to improve adherence to intervention protocols, and any procedures for monitoring adherence (eg, drug tablet return, laboratory tests)                                                                                                                                                                                                                              | P6       |
|                                                           | 11d | Relevant concomitant care and interventions that are permitted or prohibited during the trial                                                                                                                                                                                                                                                                                  | P6       |
| Outcomes                                                  | 12  | Primary, secondary, and other outcomes, including the specific measurement variable (eg, systolic blood pressure), analysis metric (eg, change from baseline, final value, time to event), method of aggregation (eg, median, proportion), and time point for each outcome. Explanation of the clinical relevance of chosen efficacy and harm outcomes is strongly recommended | P6-7     |
| Participant timeline                                      | 13  | Time schedule of enrolment, interventions (including any run-ins and washouts), assessments, and visits for participants. A schematic diagram is highly recommended (see Figure)                                                                                                                                                                                               | P7       |

|                            |             |    |                                                                                                                                                                                       |    |
|----------------------------|-------------|----|---------------------------------------------------------------------------------------------------------------------------------------------------------------------------------------|----|
| 1<br>2<br>3<br>4<br>5<br>6 | Sample size | 14 | Estimated number of participants needed to achieve study objectives and how it was determined, including clinical and statistical assumptions supporting any sample size calculations | P8 |
| 7<br>8<br>9                | Recruitment | 15 | Strategies for achieving adequate participant enrolment to reach target sample size                                                                                                   | P8 |

### Methods: Assignment of interventions (for controlled trials)

#### Allocation:

|                                                          |                                  |     |                                                                                                                                                                                                                                                                                                                                                          |    |
|----------------------------------------------------------|----------------------------------|-----|----------------------------------------------------------------------------------------------------------------------------------------------------------------------------------------------------------------------------------------------------------------------------------------------------------------------------------------------------------|----|
| 14<br>15<br>16<br>17<br>18<br>19<br>20<br>21<br>22<br>23 | Sequence generation              | 16a | Method of generating the allocation sequence (eg, computer-generated random numbers), and list of any factors for stratification. To reduce predictability of a random sequence, details of any planned restriction (eg, blocking) should be provided in a separate document that is unavailable to those who enrol participants or assign interventions | NA |
| 24<br>25<br>26<br>27<br>28<br>29<br>30                   | Allocation concealment mechanism | 16b | Mechanism of implementing the allocation sequence (eg, central telephone; sequentially numbered, opaque, sealed envelopes), describing any steps to conceal the sequence until interventions are assigned                                                                                                                                                | NA |
| 31<br>32<br>33<br>34                                     | Implementation                   | 16c | Who will generate the allocation sequence, who will enrol participants, and who will assign participants to interventions                                                                                                                                                                                                                                | NA |
| 35<br>36<br>37<br>38<br>39                               | Blinding (masking)               | 17a | Who will be blinded after assignment to interventions (eg, trial participants, care providers, outcome assessors, data analysts), and how                                                                                                                                                                                                                | NA |
| 40<br>41<br>42<br>43                                     |                                  | 17b | If blinded, circumstances under which unblinding is permissible, and procedure for revealing a participant's allocated intervention during the trial                                                                                                                                                                                                     | NA |

### Methods: Data collection, management, and analysis

|                                                                                        |                         |     |                                                                                                                                                                                                                                                                                                                                                                                                              |    |
|----------------------------------------------------------------------------------------|-------------------------|-----|--------------------------------------------------------------------------------------------------------------------------------------------------------------------------------------------------------------------------------------------------------------------------------------------------------------------------------------------------------------------------------------------------------------|----|
| 46<br>47<br>48<br>49<br>50<br>51<br>52<br>53<br>54<br>55<br>56<br>57<br>58<br>59<br>60 | Data collection methods | 18a | Plans for assessment and collection of outcome, baseline, and other trial data, including any related processes to promote data quality (eg, duplicate measurements, training of assessors) and a description of study instruments (eg, questionnaires, laboratory tests) along with their reliability and validity, if known. Reference to where data collection forms can be found, if not in the protocol | P7 |
|----------------------------------------------------------------------------------------|-------------------------|-----|--------------------------------------------------------------------------------------------------------------------------------------------------------------------------------------------------------------------------------------------------------------------------------------------------------------------------------------------------------------------------------------------------------------|----|

|    |                                 |     |                                                           |    |
|----|---------------------------------|-----|-----------------------------------------------------------|----|
| 1  |                                 |     |                                                           |    |
| 2  |                                 | 18b | Plans to promote participant retention and complete       | P7 |
| 3  |                                 |     | follow-up, including list of any outcome data to be       |    |
| 4  |                                 |     | collected for participants who discontinue or deviate     |    |
| 5  |                                 |     | from intervention protocols                               |    |
| 6  |                                 |     |                                                           |    |
| 7  | Data                            | 19  | Plans for data entry, coding, security, and storage,      | P7 |
| 8  | management                      |     | including any related processes to promote data           |    |
| 9  |                                 |     | quality (eg, double data entry; range checks for data     |    |
| 10 |                                 |     | values). Reference to where details of data               |    |
| 11 |                                 |     | management procedures can be found, if not in the         |    |
| 12 |                                 |     | protocol                                                  |    |
| 13 |                                 |     |                                                           |    |
| 14 |                                 |     |                                                           |    |
| 15 | Statistical                     | 20a | Statistical methods for analysing primary and             | P8 |
| 16 | methods                         |     | secondary outcomes. Reference to where other              |    |
| 17 |                                 |     | details of the statistical analysis plan can be found, if |    |
| 18 |                                 |     | not in the protocol                                       |    |
| 19 |                                 |     |                                                           |    |
| 20 |                                 |     |                                                           |    |
| 21 |                                 | 20b | Methods for any additional analyses (eg, subgroup         | P8 |
| 22 |                                 |     | and adjusted analyses)                                    |    |
| 23 |                                 |     |                                                           |    |
| 24 |                                 | 20c | Definition of analysis population relating to protocol    | P8 |
| 25 |                                 |     | non-adherence (eg, as randomised analysis), and           |    |
| 26 |                                 |     | any statistical methods to handle missing data (eg,       |    |
| 27 |                                 |     | multiple imputation)                                      |    |
| 28 |                                 |     |                                                           |    |
| 29 |                                 |     |                                                           |    |
| 30 | <b>Methods: Monitoring</b>      |     |                                                           |    |
| 31 |                                 |     |                                                           |    |
| 32 | Data monitoring                 | 21a | Composition of data monitoring committee (DMC);           | P8 |
| 33 |                                 |     | summary of its role and reporting structure;              |    |
| 34 |                                 |     | statement of whether it is independent from the           |    |
| 35 |                                 |     | sponsor and competing interests; and reference to         |    |
| 36 |                                 |     | where further details about its charter can be found,     |    |
| 37 |                                 |     | if not in the protocol. Alternatively, an explanation of  |    |
| 38 |                                 |     | why a DMC is not needed                                   |    |
| 39 |                                 |     |                                                           |    |
| 40 |                                 |     |                                                           |    |
| 41 |                                 | 21b | Description of any interim analyses and stopping          | P8 |
| 42 |                                 |     | guidelines, including who will have access to these       |    |
| 43 |                                 |     | interim results and make the final decision to            |    |
| 44 |                                 |     | terminate the trial                                       |    |
| 45 |                                 |     |                                                           |    |
| 46 |                                 |     |                                                           |    |
| 47 | Harms                           | 22  | Plans for collecting, assessing, reporting, and           | P8 |
| 48 |                                 |     | managing solicited and spontaneously reported             |    |
| 49 |                                 |     | adverse events and other unintended effects of trial      |    |
| 50 |                                 |     | interventions or trial conduct                            |    |
| 51 |                                 |     |                                                           |    |
| 52 |                                 |     |                                                           |    |
| 53 | Auditing                        | 23  | Frequency and procedures for auditing trial conduct,      | P8 |
| 54 |                                 |     | if any, and whether the process will be independent       |    |
| 55 |                                 |     | from investigators and the sponsor                        |    |
| 56 |                                 |     |                                                           |    |
| 57 |                                 |     |                                                           |    |
| 58 | <b>Ethics and dissemination</b> |     |                                                           |    |
| 59 |                                 |     |                                                           |    |
| 60 |                                 |     |                                                           |    |



|    |                 |     |                                                          |     |
|----|-----------------|-----|----------------------------------------------------------|-----|
| 1  |                 |     |                                                          |     |
| 2  | Research ethics | 24  | Plans for seeking research ethics                        | P9  |
| 3  | approval        |     | committee/institutional review board (REC/IRB)           |     |
| 4  |                 |     | approval                                                 |     |
| 5  |                 |     |                                                          |     |
| 6  | Protocol        | 25  | Plans for communicating important protocol               | P10 |
| 7  | amendments      |     | modifications (eg, changes to eligibility criteria,      |     |
| 8  |                 |     | outcomes, analyses) to relevant parties (eg,             |     |
| 9  |                 |     | investigators, REC/IRBs, trial participants, trial       |     |
| 10 |                 |     | registries, journals, regulators)                        |     |
| 11 |                 |     |                                                          |     |
| 12 |                 |     |                                                          |     |
| 13 | Consent or      | 26a | Who will obtain informed consent or assent from          | P9  |
| 14 | assent          |     | potential trial participants or authorised surrogates,   |     |
| 15 |                 |     | and how (see Item 32)                                    |     |
| 16 |                 |     |                                                          |     |
| 17 |                 |     |                                                          |     |
| 18 |                 | 26b | Additional consent provisions for collection and use     | NA  |
| 19 |                 |     | of participant data and biological specimens in          |     |
| 20 |                 |     | ancillary studies, if applicable                         |     |
| 21 |                 |     |                                                          |     |
| 22 | Confidentiality | 27  | How personal information about potential and             | P14 |
| 23 |                 |     | enrolled participants will be collected, shared, and     |     |
| 24 |                 |     | maintained in order to protect confidentiality before,   |     |
| 25 |                 |     | during, and after the trial                              |     |
| 26 |                 |     |                                                          |     |
| 27 |                 |     |                                                          |     |
| 28 | Declaration of  | 28  | Financial and other competing interests for principal    | P14 |
| 29 | interests       |     | investigators for the overall trial and each study site  |     |
| 30 |                 |     |                                                          |     |
| 31 | Access to data  | 29  | Statement of who will have access to the final trial     | P14 |
| 32 |                 |     | dataset, and disclosure of contractual agreements        |     |
| 33 |                 |     | that limit such access for investigators                 |     |
| 34 |                 |     |                                                          |     |
| 35 | Ancillary and   | 30  | Provisions, if any, for ancillary and post-trial care,   | NA  |
| 36 | post-trial care |     | and for compensation to those who suffer harm from       |     |
| 37 |                 |     | trial participation                                      |     |
| 38 |                 |     |                                                          |     |
| 39 |                 |     |                                                          |     |
| 40 | Dissemination   | 31a | Plans for investigators and sponsor to communicate       | P8  |
| 41 | policy          |     | trial results to participants, healthcare professionals, |     |
| 42 |                 |     | the public, and other relevant groups (eg, via           |     |
| 43 |                 |     | publication, reporting in results databases, or other    |     |
| 44 |                 |     | data sharing arrangements), including any                |     |
| 45 |                 |     | publication restrictions                                 |     |
| 46 |                 |     |                                                          |     |
| 47 |                 |     |                                                          |     |
| 48 |                 | 31b | Authorship eligibility guidelines and any intended       | NA  |
| 49 |                 |     | use of professional writers                              |     |
| 50 |                 |     |                                                          |     |
| 51 |                 | 31c | Plans, if any, for granting public access to the full    | NA  |
| 52 |                 |     | protocol, participant-level dataset, and statistical     |     |
| 53 |                 |     | code                                                     |     |
| 54 |                 |     |                                                          |     |
| 55 |                 |     |                                                          |     |

## Appendices

|                            |    |                                                                                                                                                                                                |    |
|----------------------------|----|------------------------------------------------------------------------------------------------------------------------------------------------------------------------------------------------|----|
| Informed consent materials | 32 | Model consent form and other related documentation given to participants and authorised surrogates                                                                                             | NA |
| Biological specimens       | 33 | Plans for collection, laboratory evaluation, and storage of biological specimens for genetic or molecular analysis in the current trial and for future use in ancillary studies, if applicable | NA |

\*It is strongly recommended that this checklist be read in conjunction with the SPIRIT 2013 Explanation & Elaboration for important clarification on the items. Amendments to the protocol should be tracked and dated. The SPIRIT checklist is copyrighted by the SPIRIT Group under the Creative Commons "[Attribution-NonCommercial-NoDerivs 3.0 Unported](#)" license.

For peer review only

# BMJ Open

## Efficacy and safety of radiotherapy combined with atezolizumab plus bevacizumab in treating hepatocellular carcinoma with portal vein tumor thrombus: A study protocol

|                                 |                                                                                                                                                                                                                                                                                                                                                                                                                                                                                                                                                                                                                                                       |
|---------------------------------|-------------------------------------------------------------------------------------------------------------------------------------------------------------------------------------------------------------------------------------------------------------------------------------------------------------------------------------------------------------------------------------------------------------------------------------------------------------------------------------------------------------------------------------------------------------------------------------------------------------------------------------------------------|
| Journal:                        | <i>BMJ Open</i>                                                                                                                                                                                                                                                                                                                                                                                                                                                                                                                                                                                                                                       |
| Manuscript ID                   | bmjopen-2022-064688.R2                                                                                                                                                                                                                                                                                                                                                                                                                                                                                                                                                                                                                                |
| Article Type:                   | Protocol                                                                                                                                                                                                                                                                                                                                                                                                                                                                                                                                                                                                                                              |
| Date Submitted by the Author:   | 21-Sep-2022                                                                                                                                                                                                                                                                                                                                                                                                                                                                                                                                                                                                                                           |
| Complete List of Authors:       | Wang, Kang; Eastern Hepatobiliary Surgery Hospital<br>Yu, Hong-Ming; Eastern Hepatobiliary Surgery Hospital<br>Xiang, Yan-Jun; Eastern Hepatobiliary Surgery Hospital<br>Cheng, Yu-Qiang; Eastern Hepatobiliary Surgery Hospital<br>Ni, Qian-Zhi; Eastern Hepatobiliary Surgery Hospital; Shanghai Institute of Nutrition and Health Chinese Academy of Sciences<br>Guo, Wei-Xing; Eastern Hepatobiliary Surgery Hospital<br>Shi, Jie; Eastern Hepatobiliary Surgery Hospital<br>Feng, Shuang; Eastern Hepatobiliary Surgery Hospital<br>Zhai, Jian; Eastern Hepatobiliary Surgery Hospital<br>Cheng, Shu-Qun; Eastern Hepatobiliary Surgery Hospital |
| <b>Primary Subject Heading</b>: | Oncology                                                                                                                                                                                                                                                                                                                                                                                                                                                                                                                                                                                                                                              |
| Secondary Subject Heading:      | Oncology                                                                                                                                                                                                                                                                                                                                                                                                                                                                                                                                                                                                                                              |
| Keywords:                       | RADIOTHERAPY, Hepatobiliary tumours < ONCOLOGY, Adult oncology < ONCOLOGY                                                                                                                                                                                                                                                                                                                                                                                                                                                                                                                                                                             |
|                                 |                                                                                                                                                                                                                                                                                                                                                                                                                                                                                                                                                                                                                                                       |

SCHOLARONE™  
Manuscripts

1  
2 **Efficacy and safety of radiotherapy combined with atezolizumab plus bevacizumab in treating**  
3  
4 **hepatocellular carcinoma with portal vein tumor thrombus: A study protocol**  
5  
6  
7

8 **Short running title:** Radiotherapy plus T+A for HCC with PVTT  
9

10  
11 Kang Wang<sup>1</sup>, Hong-Ming Yu<sup>1</sup>, Yan-Jun Xiang<sup>1</sup>, Yu-Qiang Cheng<sup>1</sup>, Qian-Zhi Ni<sup>1,2</sup>, Wei-Xing Guo<sup>1</sup>,  
12  
13 Jie Shi<sup>1</sup>, Shuang Feng<sup>3</sup>, Jian Zhai<sup>4</sup>, Shu-Qun Cheng<sup>1\*</sup>  
14  
15

16  
17 <sup>1</sup>Department of Hepatic Surgery VI, Eastern Hepatobiliary Surgery Hospital, Naval Medical  
18  
19 University, Shanghai, China  
20  
21

22  
23 <sup>2</sup>CAS Key Laboratory of Nutrition, Metabolism and Food Safety, Shanghai Institute of Nutrition and  
24  
25 Health, University of Chinese Academy of Sciences, Chinese Academy of Sciences, 200031,  
26  
27 Shanghai, China  
28  
29

30  
31 <sup>3</sup>Department of Radiotherapy, Eastern Hepatobiliary Surgery Hospital, Naval Medical University  
32  
33 Shanghai, China  
34  
35

36  
37 <sup>4</sup>Department II of Interventional Radiology, Eastern Hepatobiliary Surgery Hospital, Naval Medical  
38  
39 University, Shanghai, China  
40  
41

42 **\*Correspondence author:**  
43  
44

45  
46 Shu-Qun Cheng, M.D. Eastern Hepatobiliary Surgery Hospital, Naval Medical University, 225  
47  
48 Changhai Road, Shanghai, 200433 China  
49  
50

51  
52 Phone: (86) 21- 8187525  
53  
54

55  
56 Fax: (86) 21-65562400  
57  
58

59  
60 E-mail: [chengshuqun@smmu.edu.cn](mailto:chengshuqun@smmu.edu.cn)

## Abstract

**Introduction:** Vascular invasion and metastasis are poor prognostic factors in patients with hepatocellular carcinoma (HCC). The efficacy of available therapeutic regimens for unresectable HCC is not satisfactory in HCC with portal vein tumor thrombosis (PVTT). Therefore, this open-label, single-arm phase II clinical trial aims to investigate the efficacy and safety of radiotherapy combined with atezolizumab plus bevacizumab in treating HCC patients with PVTT.

**Methods and analysis:** We plan to enroll patients diagnosed with unresectable hepatocellular carcinoma complicated by PVTT. Intensity-modulated radiotherapy (IMRT) combined with atezolizumab plus bevacizumab will be administered for treatment. Patients will initially receive radiotherapy, with each IMRT cycle lasting for 28 days and the total dose of tumor (DT) of 40 Gy/20 f/26 d. CT scan will be performed again, and the treatment plan will be reformulated after field constriction. The treatment will continue until the total DT is up to 54-56 Gy/27-28 f. The treatment with atezolizumab plus bevacizumab will be started at  $3\pm 1$  d after the initiation of radiotherapy and will continue until unacceptable toxicity or disease progression. The primary endpoint is objective response rate (ORR), while the secondary endpoints include overall survival, disease control rate, progression-free survival, time to progression, duration of response, and the rate of surgical conversions. Assuming an ORR of 47%, with a two-sided alpha error of 0.1, 90% power, and a 10% dropout rate, the required number of evaluable patients is 42.

**Ethics and dissemination:** This study will be conducted according to the standards of Good Clinical Practice and in compliance with the principles of the Declaration of Helsinki. The Ethics Committee of our Hospital has approved the protocol (EHBHKY2021-K-017). All participants are required to provide written informed consent. The results of the trial will be published in peer-reviewed journals and presented at international conferences.

**Registration details:** ChiCTR.org, registration number: ChiCTR2100049831.

1  
2 **Keywords:** *Hepatocellular carcinoma, portal vein tumor thrombus, radiotherapy, atezolizumab,*  
3  
4 *bevacizumab*

5  
6  
7  
8 **Strengths and limitations of this study**  
9

- 10  
11 ● This study was a single-arm trial without a control group.  
12  
13 ● This study is an exploratory trial with a small sample size.  
14  
15 ● The conclusions of this study may serve as preliminary evidence for subsequent large-scale,  
16  
17 randomized, controlled clinical trials.  
18  
19

20  
21  
22  
23  
24  
25 **Introduction**  
26

27  
28 Liver cancer is the seventh most common cancer and the second most deadly cancer, with more than  
29 900,000 new cases being diagnosed worldwide every year.<sup>1</sup> In China, the age-standardized annual  
30 incidence of liver cancer is about 26.67/100,000,<sup>2</sup> while the 5-year survival rate is only around 12%.<sup>3</sup>  
31  
32 Hepatocellular carcinoma (HCC) is the most common histological subtype of primary liver cancer,<sup>4</sup>  
33 and surgery is the preferred and most efficacious approach for the treatment of HCC. However, some  
34 patients lose the chance for surgery at the time of diagnosis due to their intermediate to advanced  
35 tumors, liver dysfunction, etc. <sup>5</sup> Local therapies (including radiotherapy) and systemic therapies are  
36 important options for prolonging the survival of HCC patients who cannot undergo surgical resection.  
37  
38 Due to the promising antitumor activity and favorable safety profile in the IMbrave150 trial, with the  
39 mortality risk being decreased by 42% compared with sorafenib,<sup>6</sup> atezolizumab plus bevacizumab  
40 have become the standard first-line therapy for unresectable HCC. Yet, the objective response rate  
41 (ORR) with atezolizumab plus bevacizumab in unresectable HCC patients was reported to be only  
42 27.3%.<sup>6</sup> Hence, improving the therapeutic effect in patients is still a great clinical challenge.  
43  
44  
45  
46  
47  
48  
49  
50  
51  
52  
53  
54  
55  
56  
57  
58  
59  
60

1  
2 Vascular invasion and metastasis are commonly seen in patients with intermediate to advanced-stage  
3  
4 HC, as 44%-62% of patients with advanced HCC have been reported to develop portal vein tumor  
5  
6 thrombosis (PVTT).<sup>7</sup> In addition, the range and severity of PVTT have been significantly associated  
7  
8 with the prognosis of unresectable HCC patients, with the median overall survival being just 2.7 to 4  
9  
10 months in naive HCC patients with PVTT.<sup>8</sup> However, there are significant differences between  
11  
12 eastern and western countries in the treatment strategies used for HCC patients with PVTT.<sup>9</sup>  
13  
14 Guidelines from western countries argue that HCC complicated with PVTT represents the advanced  
15  
16 stage of HCC, advocating sorafenib as the only treatment option.<sup>10-12</sup> On the contrary, eastern  
17  
18 countries adopt positive strategies, such as surgical resection, radiotherapy, transcatheter arterial  
19  
20 chemoembolization (TACE), and surgery combined with multidisciplinary therapies, which are  
21  
22 expected to improve the long-term survival of these patients.<sup>13-16</sup>  
23  
24  
25  
26  
27

28 Radiotherapy is recommended for unresectable HCC patients with types I, II, and III PVTT, whose  
29  
30 liver function is graded as Child-Pugh A and B. In addition, previous studies have shown that  
31  
32 radiotherapy can synergistically enhance the antitumor effect of immunotherapy and targeted therapy  
33  
34 by changing the tumor microenvironment.<sup>17 18</sup> At present, radiotherapy combined with  
35  
36 immunotherapy and targeted therapy is currently one of the dominant research topics within the tumor  
37  
38 area. A number of studies have also suggested that radiotherapy combined with sorafenib alone  
39  
40 improves OS in patients with HCC complicated by PVTT,<sup>19</sup> and the feasibility of concurrent  
41  
42 radiotherapy and sorafenib.<sup>20 21</sup> In addition, the results of a previous retrospective study showed that  
43  
44 radiotherapy combined with atezolizumab plus bevacizumab was feasible in unresectable HCC.<sup>22</sup>  
45  
46 However, whether the combination of radiotherapy and immunotherapy plus targeted therapy can  
47  
48 improve the efficacy in patients with HCC complicated by PVTT needs to be further verified.  
49  
50  
51  
52  
53

54 Therefore, we proposed an open-label, multicenter, single-arm phase II clinical trial. Patients  
55  
56 diagnosed with locally advanced or metastatic and/or unresectable HCC complicated with PVTT will  
57  
58 be preliminarily enrolled to explore the efficacy and safety of radiotherapy combined with  
59  
60

1  
2 atezolizumab plus bevacizumab, which is expected to provide an efficacious therapeutic regimen for  
3  
4 HCC patients with PVTT and further improve the treatment response and prognosis. Here, we present  
5  
6 the protocol in accordance with the SPIRIT reporting checklist.  
7  
8  
9

## 10 **Methods and analysis**

### 13 **Study design and objective**

14  
15  
16  
17 This open-label, multicenter, single-arm clinical trial will enroll patients diagnosed with locally  
18  
19 advanced or metastatic and/or unresectable HCC complicated with PVTT from the departments of  
20  
21 hepatobiliary surgery of our Hospitals between August 2021 and December 2021 so as to initially  
22  
23 exploring the efficacy and safety of radiotherapy combined with atezolizumab plus bevacizumab in  
24  
25 naive patients with unresectable HCC complicated by PVTT.  
26  
27  
28

### 29 **Eligibility criteria**

30  
31  
32  
33 The key inclusion criteria are as follows: 1) Males or non-pregnant females aged between 18 and 70  
34  
35 years old; 2) Signed informed consent form; 3) Able to comply with the study protocol according to  
36  
37 the investigator's judgment; 4) Histologically, cytologically or clinically diagnosed with  
38  
39 hepatocellular carcinoma (HCC); 5) Confirmed portal vein tumor thrombus by imaging findings; 6)  
40  
41 Not suitable for radical surgical treatment; 7) Have not received any antitumor treatment; 8) At least  
42  
43 one measurable untreated lesion (per RECIST 1.1); 9) Pre-treatment tumor tissue sample (if available);  
44  
45 10) ECOG Performance Status of 0 or 1 within 7 days prior to initiation of study treatment; 11) Child-  
46  
47 Pugh class A within 7 days prior to initiation of study treatment; 12) Adequate hematologic and organ  
48  
49 functions, based on the following laboratory test results obtained within 7 days prior to initiation of  
50  
51 study treatment; 13) Resolution of any acute, clinically significant treatment-related toxicity from  
52  
53 prior therapy to grade < 1 prior to study entry, with the exception of alopecia; 14) Negative HIV test  
54  
55 at screening.  
56  
57  
58  
59  
60



1  
2 The key exclusion criteria are as follows: 1) History of the leptomenigeal disease; 2) Active or  
3  
4 history of autoimmune disease or immune deficiency; 3) History of idiopathic pulmonary fibrosis,  
5  
6 organizing pneumonia (e.g., bronchiolitis obliterans), drug-induced pneumonitis, or idiopathic  
7  
8 pneumonitis, or evidence of active pneumonitis on screening chest computed tomography (CT) scan.  
9  
10 History of radiation pneumonitis in the radiation field (fibrosis) is permitted; 4) Active tuberculosis;  
11  
12  
13 5) Significant cardiovascular disease (such as New York Heart Association Class II or greater cardiac  
14  
15 disease, myocardial infarction, or cerebrovascular accident) within 3 months prior to initiation of  
16  
17 study treatment, unstable arrhythmia, or unstable angina; 6) History of congenital long QT syndrome  
18  
19 or corrected QT interval > 500 ms (calculated with the use of the Fridericia method) at screening; 7)  
20  
21 History of uncorrectable electrolyte disorder affecting serum levels of potassium, calcium, or  
22  
23 magnesium; 8) The major surgical procedure, other than for diagnosis, within 4 weeks prior to  
24  
25 initiation of study treatment, or anticipation of the need for a major surgical procedure during the  
26  
27 study; 9) History of malignancy other than HCC within 5 years prior to screening; 10) Severe  
28  
29 infection within 4 weeks prior to initiation of study treatment; 11) Treatment with therapeutic oral or  
30  
31 intravenous antibiotics within 2 weeks prior to initiation of study treatment; 12) Prior allogeneic stem  
32  
33 cell or solid organ transplantation; 13) Untreated or incompletely treated esophageal and/or gastric  
34  
35 varices that are bleeding or have a high risk for bleeding; 15) Co-infection of HBV and HCV; 16)  
36  
37 Symptomatic, untreated, or actively progressing central nervous system (CNS) metastases.  
38  
39  
40  
41  
42  
43  
44

### 45 **Treatment plan**

46  
47 Patients will initially receive intensity-modulated radiotherapy (IMRT) with each cycle for 28 days.  
48  
49 A treatment plan will be established after CT location. The clinical target volume (CTV) includes  
50  
51 tumors and tumor thrombi. The planning target volume (PTV) will be expanded by 0.5-1.0 cm, with  
52  
53 conventional fractionation at a single dose of 180-220 cGy. Total DT will be 40 Gy/20 f/26 d. CT  
54  
55 scan will be performed at the end of every cycle, and the treatment plan will be reformulated after  
56  
57 field constriction. The treatment will continue until the total DT is up to 54-56 Gy/27-28 f.  
58  
59  
60

1  
2 The treatment with atezolizumab plus bevacizumab will be started at  $3\pm 1$  d after the initiation of  
3  
4 IMRT. Each treatment cycle will last for 21 days. On the first day of each cycle, atezolizumab  
5  
6 injection will be intravenously administered at a fixed dose of 1,200 mg (initial intravenous injection  
7  
8 for 60 min, and subsequent intravenous injections for 30 min if well-tolerated). Bevacizumab at a  
9  
10 dose of 15 mg/kg will be intravenously administered at least 5 min apart (initial intravenous injection  
11  
12 for 90 min, and subsequent intravenous injections reduced to 60 min and 30 min if well-tolerated).  
13  
14 The treatment was discontinued when there was no additional clinical benefit, as judged by the  
15  
16 investigator (based on imaging, biochemical indicators, and clinical status of the patient). Then, the  
17  
18 patient received the guideline-recommended second-line therapy.  
19  
20  
21  
22

23  
24 Delayed treatment or dose reduction will be determined by the clinical team, and the specific  
25  
26 adjustment plan will be determined by the investigator based on the patient's clinical condition. In  
27  
28 case of severe toxicity, the administration will be delayed, and/or the dose will be reduced. If any  
29  
30 serious adverse event (SAE) occurs during the radiotherapy, or the radiotherapy is delayed for more  
31  
32 than 4 weeks for any reason, radiotherapy sessions will be terminated. The doses of atezolizumab and  
33  
34 bevacizumab will be adjusted according to the drug's instructions.  
35  
36  
37

## 38 39 **Endpoints**

40  
41  
42 The primary endpoint is ORR, which is defined as the proportion of patients with Complete Response  
43  
44 (CR) and Partial Response (PR). CR or PR is assessed in accordance with Response  
45  
46 Evaluation Criteria In Solid Tumors (RECIST) 1.1. The responses will be independently evaluated  
47  
48 by three to six experienced senior physicians who are not investigators in this study.  
49  
50  
51

52  
53 Secondary endpoints include (1) OS, defined as the time between the first study treatment and  
54  
55 death (for any reason). (2) Disease control rate (DCR), defined as the percentage of subjects with the  
56  
57 best response as CR, PR, or stable disease (SD). (3) Progression-free survival (PFS), defined as the  
58  
59 time between the first treatment and the first tumor progression or appearance of a new lesion or death  
60

1  
2 due to any cause, whichever occurs first. (4) Time to progression (TTP), defined as the time between  
3  
4 the first treatment to first tumor progression. (5) Duration of response (DOR), defined as the time  
5  
6 from first tumor remission to first tumor progression or death due to any cause. The DCRs, PFSs,  
7  
8 TTPs, and DORs will be calculated in accordance with the RECIST version 1.1, modified RECIST  
9  
10 (mRECIST), and immune-modified RECIST (imRECIST), respectively. (6) The rate of surgical  
11  
12 conversions is defined as the proportion of subjects who receive the study treatment and are assessed  
13  
14 to be viable for surgical resection. The resectability criteria include successful down-staging of the  
15  
16 tumor, sufficient future liver remnant (FLR), and technically resectable assessed by the investigator.  
17  
18 The definition of successful downstaging was based on the CSCO guideline, which was 1) stage Ia,  
19  
20 Ib, and IIa, 2) IIb, if the tumor is confined to the same segment or the same side of the liver or  
21  
22 intraoperative radiofrequency ablation can be performed at the same time to treat the lesions outside  
23  
24 the resection range, and 3) IIIa/b, if the tumor is confined to the hemi-liver, and it is expected that the  
25  
26 tumor thrombus can be completely removed during the operation, surgical resection of the tumor and  
27  
28 thrombectomy through the portal vein can be considered.  
29  
30  
31  
32  
33  
34

35 Adverse events (AEs) are assessed in accordance with the NCI Common Terminology Criteria for  
36  
37 Adverse Events (CTCAE V5.0). Monitoring will be performed from the date on which the patient  
38  
39 signs the informed consent to 90 days after the last treatment.  
40  
41  
42

43 Biomarkers for exploratory endpoints include metagenomic sequencing of fecal organisms, five gene  
44  
45 indexes of hepatocellular carcinoma (HN1, RAN, RAMP3, KRT19, TAF9), immune correlation  
46  
47 detection (programmed death-ligand 1 [PD-L1] expression, CD8 expression; microsatellite instability  
48  
49 [MSI], and tumor mutational burden [TMB], immune-related gene expression, RNA-seq) and other  
50  
51 checkpoint proteins and cell surface markers.  
52  
53  
54

## 55 56 **Participant timeline**

57  
58  
59  
60

1  
2  
3  
4  
5  
6  
7  
8  
9  
10  
11  
12  
13  
14  
15  
16  
17  
18  
19  
20  
21  
22  
23  
24  
25  
26  
27  
28  
29  
30  
31  
32  
33  
34  
35  
36  
37  
38  
39  
40  
41  
42  
43  
44  
45  
46  
47  
48  
49  
50  
51  
52  
53  
54  
55  
56  
57  
58  
59  
60

**Table 1** lists the time points for assessing efficacy, adverse events, laboratory safety assessments (hematology, coagulation, and chemistry), physical examination, electrocardiogram (ECG), and tumor measurements.

For peer review only

**Table 1.** Schema of Single-arm Clinical Trial

| Item                              | Screening Period |         | Treatment Period                          |                                           |          | Perioperative Period | End of Trial           | Survival Follow-up |
|-----------------------------------|------------------|---------|-------------------------------------------|-------------------------------------------|----------|----------------------|------------------------|--------------------|
|                                   | -28 - 0d         | -7 - 0d | 4 weeks after the first treatment session | 7 weeks after the first treatment session | n cycles |                      | 30 days after checkout |                    |
| <b>Window period (days)</b>       | —                | —       |                                           |                                           |          |                      | ±7                     |                    |
| <b>Informed consent</b>           | ×                |         |                                           |                                           |          |                      |                        |                    |
| <b>Demographics</b>               |                  |         |                                           |                                           |          |                      |                        |                    |
| <b>Past medical history</b>       | ×                |         |                                           |                                           |          |                      |                        |                    |
| <b>History of tumor treatment</b> |                  |         |                                           |                                           |          |                      |                        |                    |
| <b>Physical examination</b>       |                  | ×       | ×                                         | Every 3 weeks                             |          | ×                    | ×                      |                    |
| <b>Vital signs</b>                |                  | ×       | ×                                         | Every 3 weeks                             |          | ×                    | ×                      |                    |
| <b>ECOG</b>                       |                  | ×       | ×                                         | Every 3 weeks                             |          |                      | ×                      |                    |
| <b>Pregnancy test</b>             |                  | ×       |                                           |                                           |          |                      | ×                      |                    |
| <b>Infection screening</b>        | ×                |         |                                           |                                           |          |                      | ×                      |                    |
| <b>Imaging</b>                    | ×                |         | ×                                         | Every 6 weeks                             |          |                      | ×                      | ×                  |
| <b>Tumor markers</b>              |                  | ×       | ×                                         | Every 6 weeks                             |          |                      | ×                      |                    |
| <b>Echocardiography</b>           | ×                |         |                                           |                                           |          |                      | ×                      |                    |
| <b>Tumor tissue</b>               | ×                |         |                                           |                                           |          |                      |                        |                    |
| <b>12-lead electrocardiogram</b>  |                  | ×       | When clinically indicated                 |                                           |          |                      | ×                      |                    |
| <b>Blood biochemistry</b>         |                  | ×       | ×                                         | Every 3 weeks                             |          |                      | ×                      |                    |
| <b>Routine blood test</b>         |                  | ×       | ×                                         | Every 3 weeks                             |          |                      | ×                      |                    |

|    |                                     |   |   |   |               |  |  |   |   |
|----|-------------------------------------|---|---|---|---------------|--|--|---|---|
| 1  |                                     |   |   |   |               |  |  |   |   |
| 2  |                                     |   |   |   |               |  |  |   |   |
| 3  |                                     |   |   |   |               |  |  |   |   |
| 4  | <b>Routine urine test</b>           | × | × |   | Every 3 weeks |  |  |   | × |
| 5  |                                     |   |   |   |               |  |  |   |   |
| 6  | <b>Routine stool test</b>           | × | × |   | Every 3 weeks |  |  |   | × |
| 7  |                                     |   |   |   |               |  |  |   |   |
| 8  | <b>Thyroid function, pituitary</b>  |   |   |   |               |  |  |   |   |
| 9  |                                     | × | × |   | Every 3 weeks |  |  |   | × |
| 10 | <b>function, coagulation</b>        |   |   |   |               |  |  |   |   |
| 11 | <b>Gut microbiome testing for</b>   |   |   |   |               |  |  |   |   |
| 12 |                                     | × |   |   | ×             |  |  |   | × |
| 13 | <b>the stool sample</b>             |   |   |   |               |  |  |   |   |
| 14 | <b>Biomarker testing for the</b>    |   |   |   |               |  |  |   |   |
| 15 |                                     | × |   |   | ×             |  |  |   | × |
| 16 | <b>blood sample</b>                 |   |   |   |               |  |  |   |   |
| 17 | <b>Surgical resection</b>           |   |   |   |               |  |  | × |   |
| 18 |                                     |   |   |   |               |  |  |   |   |
| 19 | <b>Surgical complications</b>       |   |   |   |               |  |  | × |   |
| 20 |                                     |   |   |   |               |  |  |   |   |
| 21 | <b>Concomitant medication</b>       | × | × | × | Every 3 weeks |  |  |   | × |
| 22 |                                     |   |   |   |               |  |  |   |   |
| 23 | <b>Adverse events</b>               | × | × | × | Every 3 weeks |  |  |   | × |
| 24 |                                     |   |   |   |               |  |  |   |   |
| 25 | <b>Compliance evaluation</b>        | × | × | × | Every 3 weeks |  |  |   |   |
| 26 |                                     |   |   |   |               |  |  |   |   |
| 27 | <b>Dispensing of drugs</b>          |   |   | × | Every 3 weeks |  |  |   |   |
| 28 |                                     |   |   |   |               |  |  |   |   |
| 29 | <b>Recovery of drugs</b>            |   |   | × | Every 3 weeks |  |  |   | × |
| 30 |                                     |   |   |   |               |  |  |   |   |
| 31 | <b>Follow-up on survival status</b> |   |   |   |               |  |  |   |   |
| 32 |                                     |   |   |   |               |  |  |   |   |
| 33 | <b>and antitumor treatment</b>      |   |   |   |               |  |  |   | × |
| 34 |                                     |   |   |   |               |  |  |   |   |
| 35 |                                     |   |   |   |               |  |  |   |   |
| 36 |                                     |   |   |   |               |  |  |   |   |
| 37 |                                     |   |   |   |               |  |  |   |   |
| 38 |                                     |   |   |   |               |  |  |   |   |
| 39 |                                     |   |   |   |               |  |  |   |   |
| 40 |                                     |   |   |   |               |  |  |   |   |
| 41 |                                     |   |   |   |               |  |  |   |   |
| 42 |                                     |   |   |   |               |  |  |   |   |
| 43 |                                     |   |   |   |               |  |  |   |   |
| 44 |                                     |   |   |   |               |  |  |   |   |
| 45 |                                     |   |   |   |               |  |  |   |   |
| 46 |                                     |   |   |   |               |  |  |   |   |

For peer review only

1  
2 Furthermore, for the testing of biomarkers as exploratory endpoints, stool and blood samples will be  
3  
4 collected from patients prior to the first treatment, at 7 weeks after the first treatment, and after  
5  
6 treatment discontinuation, respectively.  
7  
8  
9

### 10 **Data collection and management**

11  
12  
13 The completed CRFs will be submitted to the respective sites for archiving. All data will be recorded  
14  
15 in an electronic case report form (eCRF) by investigators or clinical research coordinators. All study  
16  
17 documents will be confidential. All study data, including confirmation of all patients (effective check  
18  
19 on recorded information, such as study cases), all original copies of signed ICFs, as well as detailed  
20  
21 original records of drug distribution, shall be kept uniformly by the study institution until 5 years after  
22  
23 the end of the trial.  
24  
25  
26  
27

### 28 **Statistical methods**

29  
30  
31 According to the results of IMbrave150,<sup>6</sup> the ORR of atezolizumab plus bevacizumab in unresectable  
32  
33 HCC patients was 27.3%. The lack of evidence of atezolizumab, bevacizumab and radiotherapy in  
34  
35 patients with HCC and PVTT led to the difficulty of an evidence-based estimated ORR. Instead, we  
36  
37 searched for literatures of other systemic regimens combined with radiotherapy and found out the  
38  
39 ORR was 61.1% in HCC patients with PVTT treated with sorafenib and MIRT in a retrospective  
40  
41 study.<sup>23</sup> Hence, assuming an ORR of 47% after discussion among investigators based on the  
42  
43 experience, with a two-sided alpha error of 0.1, 90% power, and 10% dropout rate, the required  
44  
45 number of evaluable patients is 42.  
46  
47  
48  
49  
50

51  
52 The efficacy assessment is based on the full analysis set (FAS). The intention-to-treat (ITT) efficacy  
53  
54 analysis will be performed for subjects who received at least one session of the study treatment based  
55  
56 on the FAS. No supplementation will be made for missing values. The safety analysis set (SAS)  
57  
58 includes all enrolled subjects who have received at least one session of study treatment and have a  
59  
60 post-treatment safety record. This dataset will be used for safety analysis.

## Monitoring

An independent Data and Safety Monitoring Committee has been established to assess the safety data if serious adverse events occur. Any adverse events will be registered. A qualified and independent auditor is appointed to audit the trial systems, and the audit will be conducted before and during the study following a written procedure. The stopping rules for the trial are 1) the investigators find serious safety issues, or 2) the administrative department cancels the trial. The termination of the trial can be temporary or permanent. When terminating the trial, all records will be kept for future reference.

## Patient and public involvement

The patients and general public were not involved in the trial design.

## Discussion

Atezolizumab plus bevacizumab is the standard first-line therapy for unresectable HCC patients. Although the combination can significantly improve the prognosis in patients, the ORR is still not satisfactory.<sup>6</sup> Improving the therapeutic effect in patients is still a great clinical challenge. For patients with HCC, vascular invasion and metastasis are important reasons these patients cannot undergo surgical resection, as well as poor prognostic factors. Radiotherapy has an important role in treating patients with PVTT; however, the therapeutic effects are still limited. Previous clinical studies have shown that radiotherapy combined with targeted therapy, such as sorafenib, tends to prolong the overall survival of patients with HCC complicated by PVTT. In the meanwhile, a retrospective study reported the feasibility of radiotherapy combined with atezolizumab plus bevacizumab in unresectable HCC.<sup>22</sup> However, evidence on whether the combination of radiotherapy with atezolizumab plus bevacizumab can improve the therapeutic effects in unresectable HCC patients with PVTT is still warranted. Accordingly, this open-label, multicenter, single-arm clinical trial was



1  
2 designed to preliminarily explore the efficacy and safety of radiotherapy combined with atezolizumab  
3  
4 plus bevacizumab in naive unresectable HCC patients with PVTT.  
5  
6

7  
8 There are several limitations in the present study that should be considered. First, this is a single-arm  
9  
10 clinical trial without a control group that could be used to compare the efficacy and safety between  
11  
12 treatment regimens. Second, since this study is an exploratory trial with a small sample size, no  
13  
14 confirmatory efficacy conclusions can be drawn. The conclusions of this study may serve as  
15  
16 preliminary evidence for subsequent large-scale, randomized, controlled clinical trials.  
17  
18

19  
20 As the prognosis in unresectable HCC patients with PVTT remains poor, there is an urgent need to  
21  
22 find an efficacious and safe therapeutic regimen. In this study, the efficacy and safety of IMRT  
23  
24 combined with atezolizumab plus bevacizumab in native unresectable HCC patients with PVTT will  
25  
26 be investigated so as to explore a new therapeutic regimen and further improve the efficacy and  
27  
28 prognosis in these patients.  
29  
30

### 31 32 33 **Ethics and dissemination**

34  
35  
36 This study will be conducted according to the standards of Good Clinical Practice and in compliance  
37  
38 with the principles of the Declaration of Helsinki. The Ethics Committee of our Hospital has approved  
39  
40 the protocol (EHBHKY2021-K-017). All participants are required to provide written informed  
41  
42 consent. The results of the trial will be published in peer-reviewed journals and presented at  
43  
44 international conferences.  
45  
46

### 47 48 49 **Trial status**

50  
51  
52 The trial has been registered in ChiCTR.org (Registration number: ChiCTR2100049831; registration  
53  
54 date: 2021-08-10; <http://www.chictr.org.cn/showproj.aspx?proj=126593>). Recruitment is ongoing.  
55  
56 The protocol version number is 1.0. The study protocol has been reported in accordance with the  
57  
58 Standard Protocol Items: Recommendations for Clinical Interventional Trials (SPIRIT) guidelines.  
59  
60

1  
2  
3  
4  
5  
6  
7  
8  
9  
10  
11  
12  
13  
14  
15  
16  
17  
18  
19  
20  
21  
22  
23  
24  
25  
26  
27  
28  
29  
30  
31  
32  
33  
34  
35  
36  
37  
38  
39  
40  
41  
42  
43  
44  
45  
46  
47  
48  
49  
50  
51  
52  
53  
54  
55  
56  
57  
58  
59  
60

## **Acknowledgments**

The authors would like to thank the patients, their families, and all the investigators who will participate in the present study.

## **Data Sharing Statement**

We will widely disseminate the results of this clinical trial through conference presentations and publications in relevant journals. All evaluation forms, reports, and other records will be identified in a manner designed to maintain participants' confidentiality. All records will be kept in a secure storage area with limited access. Data during the study are available from the study leader upon reasonable request.

## **Authors' contributions**

Kang Wang and Yan-Jun Xiang drafted the manuscript. Kang Wang, Yan-Jun Xiang, and Hong-Ming Yu contributed equally to this work. Shu-Qun Cheng, Kang Wang, Yan-Jun Xiang, and Hong-Ming Yu designed the trial. Yu-Qiang Cheng, Qian-Zhi Ni, Wei-Xing Guo, Jie Shi, Shuang Feng, and Jian Zhai are responsible for planning the data analysis and analyzing the data resulting from the trial. All named authors adhere to the authorship guidelines of Trials. All authors have agreed to publication. All authors read and approved the final manuscript.

## **Funding**

This work was supported by the Clinical Research Plan of SHDC (No. SHDC2020CR1004A), the State Key Program of the National Natural Science Foundation of China (No: 81730097), the National Natural Science Foundation of China (No: 82072618), and the Science and Technology Commission Foundation of Shanghai Municipality (No: 19411967300). The Fundings have no roles in the design of the study and collection, analysis, and interpretation of data and in writing the manuscript.

1  
2 **Conflict of interest**  
3  
4

5 The authors have no conflicts of interest to declare.  
6  
7  
8  
9  
10  
11  
12  
13  
14  
15  
16  
17  
18  
19  
20  
21  
22  
23  
24  
25  
26  
27  
28  
29  
30  
31  
32  
33  
34  
35  
36  
37  
38  
39  
40  
41  
42  
43  
44  
45  
46  
47  
48  
49  
50  
51  
52  
53  
54  
55  
56  
57  
58  
59  
60

For peer review only

## Reference

1. Sung H, Ferlay J, Siegel RL, et al. Global Cancer Statistics 2020: GLOBOCAN Estimates of Incidence and Mortality Worldwide for 36 Cancers in 185 Countries. *CA: a cancer journal for clinicians* 2021;71(3):209-49. doi: 10.3322/caac.21660 [published Online First: 2021/02/05]
2. Zheng R, Qu C, Zhang S, et al. Liver cancer incidence and mortality in China: Temporal trends and projections to 2030. *Chin J Cancer Res* 2018;30(6):571-79. doi: 10.21147/j.issn.1000-9604.2018.06.01
3. Zeng H, Chen W, Zheng R, et al. Changing cancer survival in China during 2003–15: a pooled analysis of 17 population-based cancer registries. *The Lancet Global Health* 2018;6(5):e555-e67. doi: 10.1016/s2214-109x(18)30127-x
4. Craig AJ, von Felden J, Garcia-Lezana T, et al. Tumour evolution in hepatocellular carcinoma. *Nat Rev Gastroenterol Hepatol* 2020;17(3):139-52. doi: 10.1038/s41575-019-0229-4
5. Kudo M, Trevisani F, Abou-Alfa GK, et al. Hepatocellular Carcinoma: Therapeutic Guidelines and Medical Treatment. *Liver Cancer* 2016;6(1):16-26. doi: 10.1159/000449343
6. Finn RS, Qin S, Ikeda M, et al. Atezolizumab plus Bevacizumab in Unresectable Hepatocellular Carcinoma. *N Engl J Med* 2020;382(20):1894-905. doi: 10.1056/NEJMoa1915745
7. Zhang ZM, Lai EC, Zhang C, et al. The strategies for treating primary hepatocellular carcinoma with portal vein tumor thrombus. *Int J Surg* 2015;20:8-16. doi: 10.1016/j.ijssu.2015.05.009
8. Pawarode A, Voravud N, Sriuranpong V, et al. Natural history of untreated primary hepatocellular carcinoma: a retrospective study of 157 patients. *Am J Clin Oncol* 1998;21(4):386-91. doi: 10.1097/00000421-199808000-00014
9. Lu J, Zhang XP, Zhong BY, et al. Management of patients with hepatocellular carcinoma and portal vein tumour thrombosis: comparing east and west. *Lancet Gastroenterol Hepatol* 2019;4(9):721-30. doi: 10.1016/S2468-1253(19)30178-5

- 1  
2 10. Heimbach JK, Kulik LM, Finn RS, et al. AASLD guidelines for the treatment of hepatocellular  
3  
4 carcinoma. *Hepatology* 2018;67(1):358-80. doi: 10.1002/hep.29086  
5
- 6  
7 11. European Association For The Study Of The L, European Organisation For R, Treatment Of C.  
8  
9 EASL-EORTC clinical practice guidelines: management of hepatocellular carcinoma. *J*  
10  
11 *Hepatol* 2012;56(4):908-43. doi: 10.1016/j.jhep.2011.12.001  
12
- 13  
14 12. Omata M, Lesmana LA, Tateishi R, et al. Asian Pacific Association for the Study of the Liver  
15  
16 consensus recommendations on hepatocellular carcinoma. *Hepatol Int* 2010;4(2):439-74. doi:  
17  
18 10.1007/s12072-010-9165-7  
19
- 20  
21 13. Yoon SM, Ryoo BY, Lee SJ, et al. Efficacy and Safety of Transarterial Chemoembolization Plus  
22  
23 External Beam Radiotherapy vs Sorafenib in Hepatocellular Carcinoma With Macroscopic  
24  
25 Vascular Invasion: A Randomized Clinical Trial. *JAMA Oncol* 2018;4(5):661-69. doi:  
26  
27 10.1001/jamaoncol.2017.5847  
28
- 29  
30 14. Cheng S, Yang J, Shen F, et al. Multidisciplinary management of hepatocellular carcinoma with  
31  
32 portal vein tumor thrombus - Eastern Hepatobiliary Surgical Hospital consensus statement.  
33  
34 *Oncotarget* 2016;7(26):40816-29. doi: 10.18632/oncotarget.8386 [published Online First:  
35  
36 2016/10/27]  
37
- 38  
39 15. Kudo M, Kawamura Y, Hasegawa K, et al. Management of Hepatocellular Carcinoma in Japan:  
40  
41 JSH Consensus Statements and Recommendations 2021 Update. *Liver Cancer*  
42  
43 2021;10(3):181-223. doi: 10.1159/000514174 [published Online First: 2021/07/10]  
44
- 45  
46 16. Xie DY, Ren ZG, Zhou J, et al. 2019 Chinese clinical guidelines for the management of  
47  
48 hepatocellular carcinoma: updates and insights. *Hepatobiliary Surg Nutr* 2020;9(4):452-63.  
49  
50 doi: 10.21037/hbsn-20-480 [published Online First: 2020/08/25]  
51
- 52  
53 17. Arina A, Gutiontov SI, Weichselbaum RR. Radiotherapy and Immunotherapy for Cancer: From  
54  
55 "Systemic" to "Multisite". *Clin Cancer Res* 2020;26(12):2777-82. doi: 10.1158/1078-  
56  
57 0432.CCR-19-2034  
58  
59  
60

1  
2  
3  
4  
5  
6  
7  
8  
9  
10  
11  
12  
13  
14  
15  
16  
17  
18  
19  
20  
21  
22  
23  
24  
25  
26  
27  
28  
29  
30  
31  
32  
33  
34  
35  
36  
37  
38  
39  
40  
41  
42  
43  
44  
45  
46  
47  
48  
49  
50  
51  
52  
53  
54  
55  
56  
57  
58  
59  
60

18. Ozpiskin OM, Zhang L, Li JJ. Immune targets in the tumor microenvironment treated by radiotherapy. *Theranostics* 2019;9(5):1215-31. doi: 10.7150/thno.32648
19. Yu JI, Yoon SM, Park HC, et al. Multicenter validation study of a prognostic index for portal vein tumor thrombosis in hepatocellular carcinoma. *Cancer Res Treat* 2014;46(4):348-57. doi: 10.4143/crt.2013.142
20. Chen SW, Lin LC, Kuo YC, et al. Phase 2 study of combined sorafenib and radiation therapy in patients with advanced hepatocellular carcinoma. *Int J Radiat Oncol Biol Phys* 2014;88(5):1041-7. doi: 10.1016/j.ijrobp.2014.01.017 [published Online First: 2014/03/26]
21. Rim CH, Park S, Shin IS, et al. Is the Concurrent Use of Sorafenib and External Radiotherapy Feasible for Advanced Hepatocellular Carcinoma? A Meta-Analysis. *Cancers (Basel)* 2021;13(12) doi: 10.3390/cancers13122912 [published Online First: 2021/07/03]
22. Manzar GS, De BS, Abana CO, et al. Outcomes and Toxicities of Modern Combined Modality Therapy with Atezolizumab Plus Bevacizumab and Radiation Therapy for Hepatocellular Carcinoma. *Cancers (Basel)* 2022;14(8) doi: 10.3390/cancers14081901 [published Online First: 2022/04/24]
23. Abulimiti M, Li Z, Wang H, et al. Combination Intensity-Modulated Radiotherapy and Sorafenib Improves Outcomes in Hepatocellular Carcinoma with Portal Vein Tumor Thrombosis. *J Oncol* 2021;2021:9943683. doi: 10.1155/2021/9943683

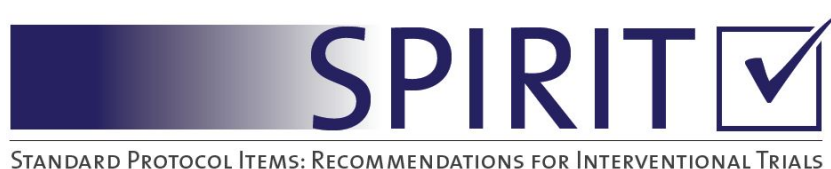

SPIRIT 2013 Checklist: Recommended items to address in a clinical trial protocol and related documents\*

| Section/item                      | ItemNo | Description                                                                                                                                                                                                                                                                              | Page  |
|-----------------------------------|--------|------------------------------------------------------------------------------------------------------------------------------------------------------------------------------------------------------------------------------------------------------------------------------------------|-------|
| <b>Administrative information</b> |        |                                                                                                                                                                                                                                                                                          |       |
| Title                             | 1      | Descriptive title identifying the study design, population, interventions, and, if applicable, trial acronym                                                                                                                                                                             | P1    |
| Trial registration                | 2a     | Trial identifier and registry name. If not yet registered, name of intended registry                                                                                                                                                                                                     | P2/10 |
|                                   | 2b     | All items from the World Health Organization Trial Registration Data Set                                                                                                                                                                                                                 | NA    |
| Protocol version                  | 3      | Date and version identifier                                                                                                                                                                                                                                                              | P10   |
| Funding                           | 4      | Sources and types of financial, material, and other support                                                                                                                                                                                                                              | P14   |
| Roles and responsibilities        | 5a     | Names, affiliations, and roles of protocol contributors                                                                                                                                                                                                                                  | P14   |
|                                   | 5b     | Name and contact information for the trial sponsor                                                                                                                                                                                                                                       | P14   |
|                                   | 5c     | Role of study sponsor and funders, if any, in study design; collection, management, analysis, and interpretation of data; writing of the report; and the decision to submit the report for publication, including whether they will have ultimate authority over any of these activities | P14   |
|                                   | 5d     | Composition, roles, and responsibilities of the coordinating centre, steering committee, endpoint adjudication committee, data management team, and other individuals or groups overseeing the trial, if applicable (see Item 21a for data monitoring committee)                         | P14   |
| <b>Introduction</b>               |        |                                                                                                                                                                                                                                                                                          |       |
| Background and rationale          | 6a     | Description of research question and justification for undertaking the trial, including summary of relevant studies (published and unpublished) examining benefits and harms for each intervention                                                                                       | P3-4  |

|    |                                                           |     |                                                          |          |
|----|-----------------------------------------------------------|-----|----------------------------------------------------------|----------|
| 1  |                                                           |     |                                                          |          |
| 2  |                                                           | 6b  | Explanation for choice of comparators                    | NA       |
| 3  |                                                           |     |                                                          |          |
| 4  | Objectives                                                | 7   | Specific objectives or hypotheses                        | P4       |
| 5  |                                                           |     |                                                          |          |
| 6  | Trial design                                              | 8   | Description of trial design including type of trial (eg, | P4       |
| 7  |                                                           |     | parallel group, crossover, factorial, single group),     |          |
| 8  |                                                           |     | allocation ratio, and framework (eg, superiority,        |          |
| 9  |                                                           |     | equivalence, noninferiority, exploratory)                |          |
| 10 |                                                           |     |                                                          |          |
| 11 |                                                           |     |                                                          |          |
| 12 | <b>Methods: Participants, interventions, and outcomes</b> |     |                                                          |          |
| 13 |                                                           |     |                                                          |          |
| 14 | Study setting                                             | 9   | Description of study settings (eg, community clinic,     | P5       |
| 15 |                                                           |     | academic hospital) and list of countries where data      |          |
| 16 |                                                           |     | will be collected. Reference to where list of study      |          |
| 17 |                                                           |     | sites can be obtained                                    |          |
| 18 |                                                           |     |                                                          |          |
| 19 | Eligibility criteria                                      | 10  | Inclusion and exclusion criteria for participants. If    | P5/16-21 |
| 20 |                                                           |     | applicable, eligibility criteria for study centres and   |          |
| 21 |                                                           |     | individuals who will perform the interventions (eg,      |          |
| 22 |                                                           |     | surgeons, psychotherapists)                              |          |
| 23 |                                                           |     |                                                          |          |
| 24 |                                                           |     |                                                          |          |
| 25 | Interventions                                             | 11a | Interventions for each group with sufficient detail to   | P5-6     |
| 26 |                                                           |     | allow replication, including how and when they will      |          |
| 27 |                                                           |     | be administered                                          |          |
| 28 |                                                           |     |                                                          |          |
| 29 |                                                           |     |                                                          |          |
| 30 |                                                           | 11b | Criteria for discontinuing or modifying allocated        | P6       |
| 31 |                                                           |     | interventions for a given trial participant (eg, drug    |          |
| 32 |                                                           |     | dose change in response to harms, participant            |          |
| 33 |                                                           |     | request, or improving/worsening disease)                 |          |
| 34 |                                                           |     |                                                          |          |
| 35 |                                                           | 11c | Strategies to improve adherence to intervention          | P6       |
| 36 |                                                           |     | protocols, and any procedures for monitoring             |          |
| 37 |                                                           |     | adherence (eg, drug tablet return, laboratory tests)     |          |
| 38 |                                                           |     |                                                          |          |
| 39 |                                                           |     |                                                          |          |
| 40 |                                                           | 11d | Relevant concomitant care and interventions that         | P6       |
| 41 |                                                           |     | are permitted or prohibited during the trial             |          |
| 42 |                                                           |     |                                                          |          |
| 43 | Outcomes                                                  | 12  | Primary, secondary, and other outcomes, including        | P6-7     |
| 44 |                                                           |     | the specific measurement variable (eg, systolic          |          |
| 45 |                                                           |     | blood pressure), analysis metric (eg, change from        |          |
| 46 |                                                           |     | baseline, final value, time to event), method of         |          |
| 47 |                                                           |     | aggregation (eg, median, proportion), and time point     |          |
| 48 |                                                           |     | for each outcome. Explanation of the clinical            |          |
| 49 |                                                           |     | relevance of chosen efficacy and harm outcomes is        |          |
| 50 |                                                           |     | strongly recommended                                     |          |
| 51 |                                                           |     |                                                          |          |
| 52 |                                                           |     |                                                          |          |
| 53 | Participant                                               | 13  | Time schedule of enrolment, interventions (including     | P7       |
| 54 | timeline                                                  |     | any run-ins and washouts), assessments, and visits       |          |
| 55 |                                                           |     | for participants. A schematic diagram is highly          |          |
| 56 |                                                           |     | recommended (see Figure)                                 |          |
| 57 |                                                           |     |                                                          |          |
| 58 |                                                           |     |                                                          |          |
| 59 |                                                           |     |                                                          |          |
| 60 |                                                           |     |                                                          |          |



|   |             |    |                                                    |    |
|---|-------------|----|----------------------------------------------------|----|
| 1 |             |    |                                                    |    |
| 2 | Sample size | 14 | Estimated number of participants needed to achieve | P8 |
| 3 |             |    | study objectives and how it was determined,        |    |
| 4 |             |    | including clinical and statistical assumptions     |    |
| 5 |             |    | supporting any sample size calculations            |    |
| 6 |             |    |                                                    |    |
| 7 | Recruitment | 15 | Strategies for achieving adequate participant      | P8 |
| 8 |             |    | enrolment to reach target sample size              |    |
| 9 |             |    |                                                    |    |

### Methods: Assignment of interventions (for controlled trials)

#### Allocation:

|    |                |     |                                                          |    |
|----|----------------|-----|----------------------------------------------------------|----|
| 14 | Sequence       | 16a | Method of generating the allocation sequence (eg,        | NA |
| 15 | generation     |     | computer-generated random numbers), and list of          |    |
| 16 |                |     | any factors for stratification. To reduce predictability |    |
| 17 |                |     | of a random sequence, details of any planned             |    |
| 18 |                |     | restriction (eg, blocking) should be provided in a       |    |
| 19 |                |     | separate document that is unavailable to those who       |    |
| 20 |                |     | enrol participants or assign interventions               |    |
| 21 |                |     |                                                          |    |
| 22 |                |     |                                                          |    |
| 23 |                |     |                                                          |    |
| 24 | Allocation     | 16b | Mechanism of implementing the allocation sequence        | NA |
| 25 | concealment    |     | (eg, central telephone; sequentially numbered,           |    |
| 26 | mechanism      |     | opaque, sealed envelopes), describing any steps to       |    |
| 27 |                |     | conceal the sequence until interventions are             |    |
| 28 |                |     | assigned                                                 |    |
| 29 |                |     |                                                          |    |
| 30 |                |     |                                                          |    |
| 31 | Implementation | 16c | Who will generate the allocation sequence, who will      | NA |
| 32 |                |     | enrol participants, and who will assign participants     |    |
| 33 |                |     | to interventions                                         |    |
| 34 |                |     |                                                          |    |
| 35 | Blinding       | 17a | Who will be blinded after assignment to                  | NA |
| 36 | (masking)      |     | interventions (eg, trial participants, care providers,   |    |
| 37 |                |     | outcome assessors, data analysts), and how               |    |
| 38 |                |     |                                                          |    |
| 39 |                |     |                                                          |    |
| 40 |                | 17b | If blinded, circumstances under which unblinding is      | NA |
| 41 |                |     | permissible, and procedure for revealing a               |    |
| 42 |                |     | participant's allocated intervention during the trial    |    |
| 43 |                |     |                                                          |    |

### Methods: Data collection, management, and analysis

|    |                 |     |                                                        |    |
|----|-----------------|-----|--------------------------------------------------------|----|
| 46 | Data collection | 18a | Plans for assessment and collection of outcome,        | P7 |
| 47 | methods         |     | baseline, and other trial data, including any related  |    |
| 48 |                 |     | processes to promote data quality (eg, duplicate       |    |
| 49 |                 |     | measurements, training of assessors) and a             |    |
| 50 |                 |     | description of study instruments (eg, questionnaires,  |    |
| 51 |                 |     | laboratory tests) along with their reliability and     |    |
| 52 |                 |     | validity, if known. Reference to where data collection |    |
| 53 |                 |     | forms can be found, if not in the protocol             |    |
| 54 |                 |     |                                                        |    |
| 55 |                 |     |                                                        |    |
| 56 |                 |     |                                                        |    |
| 57 |                 |     |                                                        |    |
| 58 |                 |     |                                                        |    |
| 59 |                 |     |                                                        |    |
| 60 |                 |     |                                                        |    |

|    |                            |     |                                                           |    |
|----|----------------------------|-----|-----------------------------------------------------------|----|
| 1  |                            |     |                                                           |    |
| 2  |                            | 18b | Plans to promote participant retention and complete       | P7 |
| 3  |                            |     | follow-up, including list of any outcome data to be       |    |
| 4  |                            |     | collected for participants who discontinue or deviate     |    |
| 5  |                            |     | from intervention protocols                               |    |
| 6  |                            |     |                                                           |    |
| 7  | Data                       | 19  | Plans for data entry, coding, security, and storage,      | P7 |
| 8  | management                 |     | including any related processes to promote data           |    |
| 9  |                            |     | quality (eg, double data entry; range checks for data     |    |
| 10 |                            |     | values). Reference to where details of data               |    |
| 11 |                            |     | management procedures can be found, if not in the         |    |
| 12 |                            |     | protocol                                                  |    |
| 13 |                            |     |                                                           |    |
| 14 |                            |     |                                                           |    |
| 15 | Statistical                | 20a | Statistical methods for analysing primary and             | P8 |
| 16 | methods                    |     | secondary outcomes. Reference to where other              |    |
| 17 |                            |     | details of the statistical analysis plan can be found, if |    |
| 18 |                            |     | not in the protocol                                       |    |
| 19 |                            |     |                                                           |    |
| 20 |                            |     |                                                           |    |
| 21 |                            | 20b | Methods for any additional analyses (eg, subgroup         | P8 |
| 22 |                            |     | and adjusted analyses)                                    |    |
| 23 |                            |     |                                                           |    |
| 24 |                            | 20c | Definition of analysis population relating to protocol    | P8 |
| 25 |                            |     | non-adherence (eg, as randomised analysis), and           |    |
| 26 |                            |     | any statistical methods to handle missing data (eg,       |    |
| 27 |                            |     | multiple imputation)                                      |    |
| 28 |                            |     |                                                           |    |
| 29 |                            |     |                                                           |    |
| 30 | <b>Methods: Monitoring</b> |     |                                                           |    |
| 31 |                            |     |                                                           |    |
| 32 | Data monitoring            | 21a | Composition of data monitoring committee (DMC);           | P8 |
| 33 |                            |     | summary of its role and reporting structure;              |    |
| 34 |                            |     | statement of whether it is independent from the           |    |
| 35 |                            |     | sponsor and competing interests; and reference to         |    |
| 36 |                            |     | where further details about its charter can be found,     |    |
| 37 |                            |     | if not in the protocol. Alternatively, an explanation of  |    |
| 38 |                            |     | why a DMC is not needed                                   |    |
| 39 |                            |     |                                                           |    |
| 40 |                            |     |                                                           |    |
| 41 |                            | 21b | Description of any interim analyses and stopping          | P8 |
| 42 |                            |     | guidelines, including who will have access to these       |    |
| 43 |                            |     | interim results and make the final decision to            |    |
| 44 |                            |     | terminate the trial                                       |    |
| 45 |                            |     |                                                           |    |
| 46 |                            |     |                                                           |    |
| 47 | Harms                      | 22  | Plans for collecting, assessing, reporting, and           | P8 |
| 48 |                            |     | managing solicited and spontaneously reported             |    |
| 49 |                            |     | adverse events and other unintended effects of trial      |    |
| 50 |                            |     | interventions or trial conduct                            |    |
| 51 |                            |     |                                                           |    |
| 52 |                            |     |                                                           |    |
| 53 | Auditing                   | 23  | Frequency and procedures for auditing trial conduct,      | P8 |
| 54 |                            |     | if any, and whether the process will be independent       |    |
| 55 |                            |     | from investigators and the sponsor                        |    |
| 56 |                            |     |                                                           |    |
| 57 |                            |     |                                                           |    |

## Ethics and dissemination

|    |                               |     |                                                                                                                                                                                                                                                                                     |     |
|----|-------------------------------|-----|-------------------------------------------------------------------------------------------------------------------------------------------------------------------------------------------------------------------------------------------------------------------------------------|-----|
| 1  |                               |     |                                                                                                                                                                                                                                                                                     |     |
| 2  | Research ethics approval      | 24  | Plans for seeking research ethics committee/institutional review board (REC/IRB) approval                                                                                                                                                                                           | P9  |
| 3  |                               |     |                                                                                                                                                                                                                                                                                     |     |
| 4  |                               |     |                                                                                                                                                                                                                                                                                     |     |
| 5  |                               |     |                                                                                                                                                                                                                                                                                     |     |
| 6  | Protocol amendments           | 25  | Plans for communicating important protocol modifications (eg, changes to eligibility criteria, outcomes, analyses) to relevant parties (eg, investigators, REC/IRBs, trial participants, trial registries, journals, regulators)                                                    | P10 |
| 7  |                               |     |                                                                                                                                                                                                                                                                                     |     |
| 8  |                               |     |                                                                                                                                                                                                                                                                                     |     |
| 9  |                               |     |                                                                                                                                                                                                                                                                                     |     |
| 10 |                               |     |                                                                                                                                                                                                                                                                                     |     |
| 11 |                               |     |                                                                                                                                                                                                                                                                                     |     |
| 12 |                               |     |                                                                                                                                                                                                                                                                                     |     |
| 13 | Consent or assent             | 26a | Who will obtain informed consent or assent from potential trial participants or authorised surrogates, and how (see Item 32)                                                                                                                                                        | P9  |
| 14 |                               |     |                                                                                                                                                                                                                                                                                     |     |
| 15 |                               |     |                                                                                                                                                                                                                                                                                     |     |
| 16 |                               |     |                                                                                                                                                                                                                                                                                     |     |
| 17 |                               |     |                                                                                                                                                                                                                                                                                     |     |
| 18 |                               | 26b | Additional consent provisions for collection and use of participant data and biological specimens in ancillary studies, if applicable                                                                                                                                               | NA  |
| 19 |                               |     |                                                                                                                                                                                                                                                                                     |     |
| 20 |                               |     |                                                                                                                                                                                                                                                                                     |     |
| 21 |                               |     |                                                                                                                                                                                                                                                                                     |     |
| 22 | Confidentiality               | 27  | How personal information about potential and enrolled participants will be collected, shared, and maintained in order to protect confidentiality before, during, and after the trial                                                                                                | P14 |
| 23 |                               |     |                                                                                                                                                                                                                                                                                     |     |
| 24 |                               |     |                                                                                                                                                                                                                                                                                     |     |
| 25 |                               |     |                                                                                                                                                                                                                                                                                     |     |
| 26 |                               |     |                                                                                                                                                                                                                                                                                     |     |
| 27 |                               |     |                                                                                                                                                                                                                                                                                     |     |
| 28 | Declaration of interests      | 28  | Financial and other competing interests for principal investigators for the overall trial and each study site                                                                                                                                                                       | P14 |
| 29 |                               |     |                                                                                                                                                                                                                                                                                     |     |
| 30 |                               |     |                                                                                                                                                                                                                                                                                     |     |
| 31 | Access to data                | 29  | Statement of who will have access to the final trial dataset, and disclosure of contractual agreements that limit such access for investigators                                                                                                                                     | P14 |
| 32 |                               |     |                                                                                                                                                                                                                                                                                     |     |
| 33 |                               |     |                                                                                                                                                                                                                                                                                     |     |
| 34 |                               |     |                                                                                                                                                                                                                                                                                     |     |
| 35 | Ancillary and post-trial care | 30  | Provisions, if any, for ancillary and post-trial care, and for compensation to those who suffer harm from trial participation                                                                                                                                                       | NA  |
| 36 |                               |     |                                                                                                                                                                                                                                                                                     |     |
| 37 |                               |     |                                                                                                                                                                                                                                                                                     |     |
| 38 |                               |     |                                                                                                                                                                                                                                                                                     |     |
| 39 |                               |     |                                                                                                                                                                                                                                                                                     |     |
| 40 | Dissemination policy          | 31a | Plans for investigators and sponsor to communicate trial results to participants, healthcare professionals, the public, and other relevant groups (eg, via publication, reporting in results databases, or other data sharing arrangements), including any publication restrictions | P8  |
| 41 |                               |     |                                                                                                                                                                                                                                                                                     |     |
| 42 |                               |     |                                                                                                                                                                                                                                                                                     |     |
| 43 |                               |     |                                                                                                                                                                                                                                                                                     |     |
| 44 |                               |     |                                                                                                                                                                                                                                                                                     |     |
| 45 |                               |     |                                                                                                                                                                                                                                                                                     |     |
| 46 |                               |     |                                                                                                                                                                                                                                                                                     |     |
| 47 |                               |     |                                                                                                                                                                                                                                                                                     |     |
| 48 |                               | 31b | Authorship eligibility guidelines and any intended use of professional writers                                                                                                                                                                                                      | NA  |
| 49 |                               |     |                                                                                                                                                                                                                                                                                     |     |
| 50 |                               |     |                                                                                                                                                                                                                                                                                     |     |
| 51 |                               | 31c | Plans, if any, for granting public access to the full protocol, participant-level dataset, and statistical code                                                                                                                                                                     | NA  |
| 52 |                               |     |                                                                                                                                                                                                                                                                                     |     |
| 53 |                               |     |                                                                                                                                                                                                                                                                                     |     |
| 54 |                               |     |                                                                                                                                                                                                                                                                                     |     |
| 55 |                               |     |                                                                                                                                                                                                                                                                                     |     |

## Appendices

|    |                  |    |                                                        |    |
|----|------------------|----|--------------------------------------------------------|----|
| 1  |                  |    |                                                        |    |
| 2  | Informed consent | 32 | Model consent form and other related                   | NA |
| 3  | materials        |    | documentation given to participants and authorised     |    |
| 4  |                  |    | surrogates                                             |    |
| 5  |                  |    |                                                        |    |
| 6  | Biological       | 33 | Plans for collection, laboratory evaluation, and       | NA |
| 7  | specimens        |    | storage of biological specimens for genetic or         |    |
| 8  |                  |    | molecular analysis in the current trial and for future |    |
| 9  |                  |    | use in ancillary studies, if applicable                |    |
| 10 |                  |    |                                                        |    |

11  
12 \*It is strongly recommended that this checklist be read in conjunction with the SPIRIT 2013  
13 Explanation & Elaboration for important clarification on the items. Amendments to the  
14 protocol should be tracked and dated. The SPIRIT checklist is copyrighted by the SPIRIT  
15 Group under the Creative Commons "[Attribution-NonCommercial-NoDerivs 3.0 Unported](#)"  
16 license.  
17  
18  
19  
20  
21  
22  
23  
24  
25  
26  
27  
28  
29  
30  
31  
32  
33  
34  
35  
36  
37  
38  
39  
40  
41  
42  
43  
44  
45  
46  
47  
48  
49  
50  
51  
52  
53  
54  
55  
56  
57  
58  
59  
60

# BMJ Open

## Efficacy and safety of radiotherapy combined with atezolizumab plus bevacizumab in treating hepatocellular carcinoma with portal vein tumor thrombus: A study protocol

|                                 |                                                                                                                                                                                                                                                                                                                                                                                                                                                                                                                                                                                                                                                       |
|---------------------------------|-------------------------------------------------------------------------------------------------------------------------------------------------------------------------------------------------------------------------------------------------------------------------------------------------------------------------------------------------------------------------------------------------------------------------------------------------------------------------------------------------------------------------------------------------------------------------------------------------------------------------------------------------------|
| Journal:                        | <i>BMJ Open</i>                                                                                                                                                                                                                                                                                                                                                                                                                                                                                                                                                                                                                                       |
| Manuscript ID                   | bmjopen-2022-064688.R3                                                                                                                                                                                                                                                                                                                                                                                                                                                                                                                                                                                                                                |
| Article Type:                   | Protocol                                                                                                                                                                                                                                                                                                                                                                                                                                                                                                                                                                                                                                              |
| Date Submitted by the Author:   | 23-Sep-2022                                                                                                                                                                                                                                                                                                                                                                                                                                                                                                                                                                                                                                           |
| Complete List of Authors:       | Wang, Kang; Eastern Hepatobiliary Surgery Hospital<br>Yu, Hong-Ming; Eastern Hepatobiliary Surgery Hospital<br>Xiang, Yan-Jun; Eastern Hepatobiliary Surgery Hospital<br>Cheng, Yu-Qiang; Eastern Hepatobiliary Surgery Hospital<br>Ni, Qian-Zhi; Eastern Hepatobiliary Surgery Hospital; Shanghai Institute of Nutrition and Health Chinese Academy of Sciences<br>Guo, Wei-Xing; Eastern Hepatobiliary Surgery Hospital<br>Shi, Jie; Eastern Hepatobiliary Surgery Hospital<br>Feng, Shuang; Eastern Hepatobiliary Surgery Hospital<br>Zhai, Jian; Eastern Hepatobiliary Surgery Hospital<br>Cheng, Shu-Qun; Eastern Hepatobiliary Surgery Hospital |
| <b>Primary Subject Heading</b>: | Oncology                                                                                                                                                                                                                                                                                                                                                                                                                                                                                                                                                                                                                                              |
| Secondary Subject Heading:      | Oncology                                                                                                                                                                                                                                                                                                                                                                                                                                                                                                                                                                                                                                              |
| Keywords:                       | RADIOTHERAPY, Hepatobiliary tumours < ONCOLOGY, Adult oncology < ONCOLOGY                                                                                                                                                                                                                                                                                                                                                                                                                                                                                                                                                                             |
|                                 |                                                                                                                                                                                                                                                                                                                                                                                                                                                                                                                                                                                                                                                       |

SCHOLARONE™  
Manuscripts

1  
2 **Efficacy and safety of radiotherapy combined with atezolizumab plus bevacizumab in treating**  
3  
4 **hepatocellular carcinoma with portal vein tumor thrombus: A study protocol**  
5  
6

7  
8 **Short running title:** Radiotherapy plus T+A for HCC with PVTT  
9

10  
11 Kang Wang<sup>1</sup>, Hong-Ming Yu<sup>1</sup>, Yan-Jun Xiang<sup>1</sup>, Yu-Qiang Cheng<sup>1</sup>, Qian-Zhi Ni<sup>1,2</sup>, Wei-Xing Guo<sup>1</sup>,  
12  
13 Jie Shi<sup>1</sup>, Shuang Feng<sup>3</sup>, Jian Zhai<sup>4</sup>, Shu-Qun Cheng<sup>1\*</sup>  
14  
15

16  
17 <sup>1</sup>Department of Hepatic Surgery VI, Eastern Hepatobiliary Surgery Hospital, Naval Medical  
18  
19 University, Shanghai, China  
20  
21

22  
23 <sup>2</sup>CAS Key Laboratory of Nutrition, Metabolism and Food Safety, Shanghai Institute of Nutrition and  
24  
25 Health, University of Chinese Academy of Sciences, Chinese Academy of Sciences, 200031,  
26  
27 Shanghai, China  
28  
29

30  
31 <sup>3</sup>Department of Radiotherapy, Eastern Hepatobiliary Surgery Hospital, Naval Medical University  
32  
33 Shanghai, China  
34  
35

36  
37 <sup>4</sup>Department II of Interventional Radiology, Eastern Hepatobiliary Surgery Hospital, Naval Medical  
38  
39 University, Shanghai, China  
40  
41

42 **\*Correspondence author:**  
43  
44

45  
46 Shu-Qun Cheng, M.D. Eastern Hepatobiliary Surgery Hospital, Naval Medical University, 225  
47  
48 Changhai Road, Shanghai, 200433 China  
49  
50

51  
52 Phone: (86) 21- 8187525  
53

54  
55 Fax: (86) 21-65562400  
56  
57

58  
59 E-mail: [chengshuqun@smmu.edu.cn](mailto:chengshuqun@smmu.edu.cn)  
60

## Abstract

**Introduction:** Vascular invasion and metastasis are poor prognostic factors in patients with hepatocellular carcinoma (HCC). The efficacy of available therapeutic regimens for unresectable HCC is not satisfactory in HCC with portal vein tumor thrombosis (PVTT). Therefore, this open-label, single-arm phase II clinical trial aims to investigate the efficacy and safety of radiotherapy combined with atezolizumab plus bevacizumab in treating HCC patients with PVTT.

**Methods and analysis:** We plan to enroll patients diagnosed with unresectable hepatocellular carcinoma complicated by PVTT. Intensity-modulated radiotherapy (IMRT) combined with atezolizumab plus bevacizumab will be administered for treatment. Patients will initially receive radiotherapy, with each IMRT cycle lasting for 28 days and the total dose of tumor (DT) of 40 Gy/20 f/26 d. CT scan will be performed again, and the treatment plan will be reformulated after field constriction. The treatment will continue until the total DT is up to 54-56 Gy/27-28 f. The treatment with atezolizumab plus bevacizumab will be started at  $3\pm 1$  d after the initiation of radiotherapy and will continue until unacceptable toxicity or disease progression. The primary endpoint is objective response rate (ORR), while the secondary endpoints include overall survival, disease control rate, progression-free survival, time to progression, duration of response, and the rate of surgical conversions. Assuming an ORR of 47%, with a two-sided alpha error of 0.1, 90% power, and a 10% dropout rate, the required number of evaluable patients is 42.

**Ethics and dissemination:** This study will be conducted according to the standards of Good Clinical Practice and in compliance with the principles of the Declaration of Helsinki. The Ethics Committee of our Hospital has approved the protocol (EHBHKY2021-K-017). All participants are required to provide written informed consent. The results of the trial will be published in peer-reviewed journals and presented at international conferences.

**Registration details:** ChiCTR.org, registration number: ChiCTR2100049831.

**Keywords:** *Hepatocellular carcinoma, portal vein tumor thrombus, radiotherapy, atezolizumab, bevacizumab*

### **Strengths and limitations of this study**

- This study was a single-arm trial without a control group.
- This study is an exploratory trial with a small sample size.
- The conclusions of this study may serve as preliminary evidence for subsequent large-scale, randomized, controlled clinical trials.

### **Introduction**

Liver cancer is the seventh most common cancer and the second most deadly cancer, with more than 900,000 new cases being diagnosed worldwide every year.<sup>1</sup> In China, the age-standardized annual incidence of liver cancer is about 26.67/100,000,<sup>2</sup> while the 5-year survival rate is only around 12%.<sup>3</sup> Hepatocellular carcinoma (HCC) is the most common histological subtype of primary liver cancer,<sup>4</sup> and surgery is the preferred and most efficacious approach for the treatment of HCC. However, some patients lose the chance for surgery at the time of diagnosis due to their intermediate to advanced tumors, liver dysfunction, etc.<sup>5</sup> Local therapies (including radiotherapy) and systemic therapies are important options for prolonging the survival of HCC patients who cannot undergo surgical resection. Due to the promising antitumor activity and favorable safety profile in the IMbrave150 trial, with the mortality risk being decreased by 42% compared with sorafenib,<sup>6</sup> atezolizumab plus bevacizumab have become the standard first-line therapy for unresectable HCC. Yet, the objective response rate (ORR) with atezolizumab plus bevacizumab in unresectable HCC patients was reported to be only 27.3%.<sup>6</sup> Hence, improving the therapeutic effect in patients is still a great clinical challenge.

Vascular invasion and metastasis are commonly seen in patients with intermediate to advanced-stage HC, as 44%-62% of patients with advanced HCC have been reported to develop portal vein tumor



1  
2 thrombosis (PVTT).<sup>7</sup> In addition, the range and severity of PVTT have been significantly associated  
3  
4 with the prognosis of unresectable HCC patients, with the median overall survival being just 2.7 to 4  
5  
6 months in naive HCC patients with PVTT.<sup>8</sup> However, there are significant differences between  
7  
8 eastern and western countries in the treatment strategies used for HCC patients with PVTT.<sup>9</sup>  
9  
10 Guidelines from western countries argue that HCC complicated with PVTT represents the advanced  
11  
12 stage of HCC, advocating sorafenib as the only treatment option.<sup>10-12</sup> On the contrary, eastern  
13  
14 countries adopt positive strategies, such as surgical resection, radiotherapy, transcatheter arterial  
15  
16 chemoembolization (TACE), and surgery combined with multidisciplinary therapies, which are  
17  
18 expected to improve the long-term survival of these patients.<sup>13-16</sup>  
19  
20  
21  
22

23  
24 Radiotherapy is recommended for unresectable HCC patients with types I, II, and III PVTT, whose  
25  
26 liver function is graded as Child-Pugh A and B. In addition, previous studies have shown that  
27  
28 radiotherapy can synergistically enhance the antitumor effect of immunotherapy and targeted therapy  
29  
30 by changing the tumor microenvironment.<sup>17-18</sup> At present, radiotherapy combined with  
31  
32 immunotherapy and targeted therapy is currently one of the dominant research topics within the tumor  
33  
34 area. A number of studies have also suggested that radiotherapy combined with sorafenib alone  
35  
36 improves OS in patients with HCC complicated by PVTT,<sup>19</sup> and the feasibility of concurrent  
37  
38 radiotherapy and sorafenib.<sup>20-21</sup> In addition, the results of a previous retrospective study showed that  
39  
40 radiotherapy combined with atezolizumab plus bevacizumab was feasible in unresectable HCC.<sup>22</sup>  
41  
42 However, whether the combination of radiotherapy and immunotherapy plus targeted therapy can  
43  
44 improve the efficacy in patients with HCC complicated by PVTT needs to be further verified.  
45  
46  
47  
48  
49

50  
51 Therefore, we proposed an open-label, multicenter, single-arm phase II clinical trial. Patients  
52  
53 diagnosed with locally advanced or metastatic and/or unresectable HCC complicated with PVTT will  
54  
55 be preliminarily enrolled to explore the efficacy and safety of radiotherapy combined with  
56  
57 atezolizumab plus bevacizumab, which is expected to provide an efficacious therapeutic regimen for  
58  
59  
60

1 HCC patients with PVTT and further improve the treatment response and prognosis. Here, we present  
2 the protocol in accordance with the SPIRIT reporting checklist.  
3  
4  
5  
6

## 7 **Methods and analysis**

### 8 **Study design and objective**

9  
10  
11 This open-label, multicenter, single-arm clinical trial will enroll patients diagnosed with locally  
12 advanced or metastatic and/or unresectable HCC complicated with PVTT from the departments of  
13 hepatobiliary surgery of our Hospitals between August 2021 and December 2021 so as to initially  
14 exploring the efficacy and safety of radiotherapy combined with atezolizumab plus bevacizumab in  
15 naive patients with unresectable HCC complicated by PVTT.  
16  
17  
18  
19  
20  
21  
22  
23  
24  
25

### 26 **Eligibility criteria**

27 The inclusion criteria are as follows:  
28  
29  
30

31  
32  
33  
34 1. Men or non-pregnant women aged 18 to 70 years. 2. Sign the informed consent. 3. The  
35 investigator believes that the patient has the ability to comply with the research protocol. 4.  
36 Hepatocellular carcinoma (HCC) is diagnosed by histology or cytology or clinically. Patients with  
37 liver cirrhosis are clinically diagnosed by AASLD criteria, and patients without liver cirrhosis need  
38 to be diagnosed by histology. 5. Imaging examination confirmed the existence of portal vein tumor  
39 thrombus. 6. The disease is not suitable for radical surgery. 7. Have not received any anti-tumor  
40 therapy before. 8. At least 1 measurable (measurable according to RECIST1.1), untreated lesions. 9.  
41 Pre-treatment tumor tissue samples (if available). If tumor tissue is available, submit 1 formalin-fixed,  
42 paraffin-embedded (FFPE) tumor sample in a paraffin block (preferred), or approximately 10-15  
43 slides containing unstained, freshly cut, serial sections radiographs, together with a relevant pathology  
44 report within 4 weeks of enrollment. If the FFPE samples described above are not available, any type  
45 of sample (including fine needle aspiration biopsy samples, cell mass samples [eg, from pleural  
46  
47  
48  
49  
50  
51  
52  
53  
54  
55  
56  
57  
58  
59  
60

1  
2 effusions], and lavage samples) is acceptable. A relevant pathology report should be provided with  
3  
4 the sample. If tumor tissue was not available (e.g., exhausted due to previous diagnostic testing), the  
5  
6 patient was still eligible to participate in the study. 10. ECOG performance status score of 0 or 1  
7  
8 within 7 days before enrollment. 11. Child-Pugh Grade A within 7 days before enrollment. 12.  
9  
10 Adequate hematology and organ function, based on the following laboratory test results obtained  
11  
12 within 7 days prior to enrollment (unless otherwise stated): (1) Absolute neutrophil count  $\geq 1.5 \times 10^9/L$   
13  
14 (1500/ $\mu L$ ), without granulocyte colony-stimulating factor support; (2) Lymphocyte count  $\geq 0.5 \times 10^9/L$   
15  
16 (500/ $\mu L$ ); (3) Platelet count  $\geq 75 \times 10^9/L$  (75000/ $\mu L$ ), no blood transfusion; hemoglobin  $\geq 90$  g/L, in  
17  
18 order to meet this criterion, blood transfusion is allowed to the patient; (4) Alanine aminotransferase,  
19  
20 aspartate aminotransferase and alkaline phosphatase  $\leq 5$  times the upper limit of normal (ULN); (5)  
21  
22 Serum bilirubin  $\leq 3$  times the ULN; (6) Serum creatinine  $\leq 1.5$  times the ULN or calculated creatinine  
23  
24 clearance  $\geq 50$  mL/min (calculated using the Cockcroft-Gault formula); (7) Serum albumin  $\geq 28$  g/L  
25  
26 (2.8 g/dL); (8) Patients not receiving anticoagulation therapy: international normalized ratio or  
27  
28 activated partial thromboplastin time  $\leq 2$  times the ULN; (9) Proteinuria  $< 2+$  in urine cellulose test  
29  
30 strip (performed within 7 days before the initiation of study treatment); (10) Patients with a baseline  
31  
32 cellulose dipstick urine test result of  $\geq 2+$  proteinuria should collect 24-hour urine, and then must  
33  
34 confirm that the urine protein content within 24 hours is less than 1 g. 13. Any acute, clinically  
35  
36 significant treatment-related toxicity (due to previous treatment) must have been alleviated to  $\leq$  grade  
37  
38 1 before enrolling in the study, except for alopecia; 14. Human immunodeficiency virus antibody test  
39  
40 results are negative at the time of screening; 15. Patients with active hepatitis B virus (HBV) infection:  
41  
42 HBV-DNA  $< 500$  IU/mL obtained within 28 days before the start of study treatment, and received  
43  
44 anti-HBV treatment for at least 14 days before entering the study (treatment according to local  
45  
46 standard treatment, such as entecavir) and are willing to continue receiving treatment during the study;  
47  
48 16. Women of childbearing age must have a negative pregnancy test before starting treatment, and  
49  
50 women of childbearing age and men (having sex with women of childbearing age) must agree to use  
51  
52  
53  
54  
55  
56  
57  
58  
59  
60

1  
2 without interruption during treatment and for 6 months after the last therapeutic dose is administered  
3  
4 to be effective Contraception.  
5

6  
7 The exclusion criteria are as follows:  
8

9  
10  
11 1. History of leptomeningitis. 2. Current or past autoimmune disease or immunodeficiency, including  
12  
13 but not limited to myasthenia gravis, myositis, autoimmune hepatitis, systemic lupus erythematosus,  
14  
15 rheumatoid arthritis, inflammatory bowel disease, antiphospholipid antibody syndrome, Wegener's  
16  
17 granulomatosis, Sjgre's syndrome, Guillain-Barré syndrome, or multiple sclerosis, with the following  
18  
19 exceptions: patients with prior autoimmune-related hypothyroidism receiving thyroid hormone  
20  
21 replacement therapy are eligible for study participation; patients receiving insulin therapy Patients  
22  
23 with controlled type 1 diabetes were eligible for study participation; only patients with  
24  
25 dermatologically manifested eczema, psoriasis, chronic lichen simplex, or vitiligo (eg, excluding  
26  
27 patients with psoriatic arthritis), provided All of the following conditions are eligible to participate in  
28  
29 the study: (1) The rash area must be less than 10% of the body surface area; (2) Good disease control  
30  
31 at baseline, requiring only low-efficiency topical glucocorticoid therapy; (3) In the past 12 months,  
32  
33 the pre-existing conditions did not require psoralen plus A-band UV radiation, methotrexate, vitamin  
34  
35 A acid, biological agents, oral calcineurin inhibitors, or highly effective or Acute exacerbations of  
36  
37 oral glucocorticoid therapy. 3. Idiopathic pulmonary fibrosis, organizing pneumonia (eg, bronchiolitis  
38  
39 obliterans), drug-induced pneumonia, or idiopathic pneumonia or evidence of active pneumonia on  
40  
41 chest computed tomography (CT) images during screening. Radiation pneumonitis in the permissible  
42  
43 radiation zone (fibrosis). 4. Known active tuberculosis. 5. Major cardiovascular disease within 3  
44  
45 months prior to initiation of study treatment (such as New York Heart Association class II or more  
46  
47 severe heart disease, myocardial infarction or cerebrovascular accident within 3 months prior to  
48  
49 initiation of study treatment), unstable Arrhythmia or unstable angina. 6. History of congenital long  
50  
51 QT syndrome or corrected QT interval at screening >500ms (calculated using Fridericia method). 7.  
52  
53 History of uncorrectable serum potassium, calcium or magnesium electrolyte disturbances. 8.  
54  
55  
56  
57  
58  
59  
60

1  
2 Received major surgery (except for diagnosis) within 4 weeks before starting the study treatment or  
3  
4 is expected to undergo major surgery during the study period. 9. Malignant tumors other than HCC  
5  
6 within 5 years prior to screening, except for malignancies with negligible risk of metastasis or death  
7  
8 (eg, 5-year OS rate >90%), such as adequately treated in situ cervical cancer, Non-melanoma skin  
9  
10 cancer, localized prostate cancer, ductal carcinoma in situ, or stage I uterine cancer. 10. Severe  
11  
12 infection within 4 weeks prior to initiation of study treatment, including but not limited to  
13  
14 hospitalization due to complications of infection, bacteremia or severe pneumonia. 11. Oral or  
15  
16 intravenous therapeutic antibiotics within 2 weeks prior to initiation of study treatment. Patients  
17  
18 receiving prophylactic antibiotics (eg, to prevent urinary tract infections or exacerbations of chronic  
19  
20 obstructive pulmonary disease) are eligible to participate in the study. 12. Previous allogeneic stem  
21  
22 cell or solid organ transplantation. 13. Received a live attenuated vaccine within 4 weeks before  
23  
24 starting study treatment, or is expected to receive such a vaccine during atezolizumab treatment or  
25  
26 within 5 months after the last dose of atezolizumab. 14. Patients with untreated or incompletely  
27  
28 treated esophageal and/or gastric varices with associated bleeding or at high risk of bleeding. Before  
29  
30 enrollment, patients must undergo B-ultrasound, CT, MRI, or liver elastography to assess the size of  
31  
32 all varicose veins (small to large) and treat according to local standard of care. Patients who have  
33  
34 received corresponding examinations within 6 months before starting study treatment do not need to  
35  
36 be reexamined. 15. Co-infection with HBV and hepatitis C virus (HCV). Patients with a history of  
37  
38 HCV infection but negative PCR results for HCV RNA can be considered HCV-uninfected. 16.  
39  
40 Symptomatic, untreated or progressively progressive central nervous system (CNS) metastases.  
41  
42 Asymptomatic patients with treated CNS lesions were eligible for study participation as long as all  
43  
44 of the following criteria were met: Must have disease outside the CNS measurable according to  
45  
46 RECIST v1.1; patients had no history of intracranial or intraspinal hemorrhage; metastases limited to  
47  
48 the cerebellum or supratentorial (ie, no midbrain, pons, medulla, or spinal cord metastases); no  
49  
50 evidence of progression between completion of CNS-directed therapy and initiation of study  
51  
52 treatment; patients not receiving stereotaxic within 28 days prior to initiation of study  
53  
54  
55  
56  
57  
58  
59  
60

1  
2 Targeted, whole-brain radiotherapy, and/or neurosurgical resection; patients did not require  
3  
4 continuous glucocorticoid therapy for CNS disease. Dose-stabilized anticonvulsant therapy is  
5  
6 permitted. Asymptomatic patients with newly detected CNS metastases at screening are eligible to  
7  
8 participate in the study after radiotherapy or surgery without repeat screening brain scan results. 17.  
9  
10 The patient cannot receive follow-up or is participating in other clinical trials. 18. Subjects deemed  
11  
12 unsuitable for inclusion in this study by the investigator..  
13  
14  
15  
16

### 17 **Treatment plan**

18  
19  
20 Patients will initially receive intensity-modulated radiotherapy (IMRT) with each cycle for 28 days.  
21  
22 A treatment plan will be established after CT location. The clinical target volume (CTV) includes  
23  
24 tumors and tumor thrombi. The planning target volume (PTV) will be expanded by 0.5-1.0 cm, with  
25  
26 conventional fractionation at a single dose of 180-220 cGy. Total DT will be 40 Gy/20 f/26 d. CT  
27  
28 scan will be performed at the end of every cycle, and the treatment plan will be reformulated after  
29  
30 field constriction. The treatment will continue until the total DT is up to 54-56 Gy/27-28 f.  
31  
32  
33  
34

35 The treatment with atezolizumab plus bevacizumab will be started at  $3\pm 1$  d after the initiation of  
36  
37 IMRT. Each treatment cycle will last for 21 days. On the first day of each cycle, atezolizumab  
38  
39 injection will be intravenously administered at a fixed dose of 1,200 mg (initial intravenous injection  
40  
41 for 60 min, and subsequent intravenous injections for 30 min if well-tolerated). Bevacizumab at a  
42  
43 dose of 15 mg/kg will be intravenously administered at least 5 min apart (initial intravenous injection  
44  
45 for 90 min, and subsequent intravenous injections reduced to 60 min and 30 min if well-tolerated).  
46  
47 The treatment was discontinued when there was no additional clinical benefit, as judged by the  
48  
49 investigator (based on imaging, biochemical indicators, and clinical status of the patient). Then, the  
50  
51 patient received the guideline-recommended second-line therapy.  
52  
53  
54  
55

56  
57 Delayed treatment or dose reduction will be determined by the clinical team, and the specific  
58  
59 adjustment plan will be determined by the investigator based on the patient's clinical condition. In  
60

1  
2 case of severe toxicity, the administration will be delayed, and/or the dose will be reduced. If any  
3  
4 serious adverse event (SAE) occurs during the radiotherapy, or the radiotherapy is delayed for more  
5  
6 than 4 weeks for any reason, radiotherapy sessions will be terminated. The doses of atezolizumab and  
7  
8 bevacizumab will be adjusted according to the drug's instructions.  
9

## 10 11 12 **Endpoints** 13

14  
15 The primary endpoint is ORR, which is defined as the proportion of patients with Complete Response  
16  
17 (CR) and Partial Response (PR). CR or PR is assessed in accordance with Response  
18  
19 Evaluation Criteria In Solid Tumors (RECIST) 1.1. The responses will be independently evaluated  
20  
21 by three to six experienced senior physicians who are not investigators in this study.  
22  
23  
24  
25

26  
27 Secondary endpoints include (1) OS, defined as the time between the first study treatment and  
28  
29 death (for any reason). (2) Disease control rate (DCR), defined as the percentage of subjects with the  
30  
31 best response as CR, PR, or stable disease (SD). (3) Progression-free survival (PFS), defined as the  
32  
33 time between the first treatment and the first tumor progression or appearance of a new lesion or death  
34  
35 due to any cause, whichever occurs first. (4) Time to progression (TTP), defined as the time between  
36  
37 the first treatment to first tumor progression. (5) Duration of response (DOR), defined as the time  
38  
39 from first tumor remission to first tumor progression or death due to any cause. The DCRs, PFSs,  
40  
41 TTPs, and DORs will be calculated in accordance with the RECIST version 1.1, modified RECIST  
42  
43 (mRECIST), and immune-modified RECIST (imRECIST), respectively. (6) The rate of surgical  
44  
45 conversions is defined as the proportion of subjects who receive the study treatment and are assessed  
46  
47 to be viable for surgical resection. The resectability criteria include successful down-staging of the  
48  
49 tumor, sufficient future liver remnant (FLR), and technically resectable assessed by the investigator.  
50  
51 The definition of successful downstaging was based on the CSCO guideline, which was 1) stage Ia,  
52  
53 Ib, and IIa, 2) IIb, if the tumor is confined to the same segment or the same side of the liver or  
54  
55 intraoperative radiofrequency ablation can be performed at the same time to treat the lesions outside  
56  
57 the resection range, and 3) IIIa/b, if the tumor is confined to the hemi-liver, and it is expected that the  
58  
59  
60

1  
2 tumor thrombus can be completely removed during the operation, surgical resection of the tumor and  
3  
4 thrombectomy through the portal vein can be considered.  
5  
6

7  
8 Adverse events (AEs) are assessed in accordance with the NCI Common Terminology Criteria for  
9  
10 Adverse Events (CTCAE V5.0). Monitoring will be performed from the date on which the patient  
11  
12 signs the informed consent to 90 days after the last treatment.  
13  
14

15  
16 Biomarkers for exploratory endpoints include metagenomic sequencing of fecal organisms, five gene  
17  
18 indexes of hepatocellular carcinoma (HN1, RAN, RAMP3, KRT19, TAF9), immune correlation  
19  
20 detection (programmed death-ligand 1 [PD-L1] expression, CD8 expression; microsatellite instability  
21  
22 [MSI], and tumor mutational burden [TMB], immune-related gene expression, RNA-seq) and other  
23  
24 checkpoint proteins and cell surface markers.  
25  
26

### 27 28 **Participant timeline** 29

30  
31  
32 **Table 1** lists the time points for assessing efficacy, adverse events, laboratory safety assessments  
33  
34 (hematology, coagulation, and chemistry), physical examination, electrocardiogram (ECG), and  
35  
36 tumor measurements.  
37  
38  
39  
40  
41  
42  
43  
44  
45  
46  
47  
48  
49  
50  
51  
52  
53  
54  
55  
56  
57  
58  
59  
60



**Table 1.** Schema of Single-arm Clinical Trial

| Item                              | Screening Period |         | Treatment Period                          |                                           |          | Perioperative Period | End of Trial           | Survival Follow-up |
|-----------------------------------|------------------|---------|-------------------------------------------|-------------------------------------------|----------|----------------------|------------------------|--------------------|
|                                   | -28 - 0d         | -7 - 0d | 4 weeks after the first treatment session | 7 weeks after the first treatment session | n cycles |                      | 30 days after checkout |                    |
| <b>Window period (days)</b>       | —                | —       |                                           |                                           |          |                      | ±7                     |                    |
| <b>Informed consent</b>           | ×                |         |                                           |                                           |          |                      |                        |                    |
| <b>Demographics</b>               |                  |         |                                           |                                           |          |                      |                        |                    |
| <b>Past medical history</b>       | ×                |         |                                           |                                           |          |                      |                        |                    |
| <b>History of tumor treatment</b> |                  |         |                                           |                                           |          |                      |                        |                    |
| <b>Physical examination</b>       |                  | ×       | ×                                         | Every 3 weeks                             |          | ×                    | ×                      |                    |
| <b>Vital signs</b>                |                  | ×       | ×                                         | Every 3 weeks                             |          | ×                    | ×                      |                    |
| <b>ECOG</b>                       |                  | ×       | ×                                         | Every 3 weeks                             |          |                      | ×                      |                    |
| <b>Pregnancy test</b>             |                  | ×       |                                           |                                           |          |                      | ×                      |                    |
| <b>Infection screening</b>        | ×                |         |                                           |                                           |          |                      | ×                      |                    |
| <b>Imaging</b>                    | ×                |         | ×                                         | Every 6 weeks                             |          |                      | ×                      | ×                  |
| <b>Tumor markers</b>              |                  | ×       | ×                                         | Every 6 weeks                             |          |                      | ×                      |                    |
| <b>Echocardiography</b>           | ×                |         |                                           |                                           |          |                      | ×                      |                    |
| <b>Tumor tissue</b>               | ×                |         |                                           |                                           |          |                      |                        |                    |
| <b>12-lead electrocardiogram</b>  |                  | ×       | When clinically indicated                 |                                           |          |                      | ×                      |                    |
| <b>Blood biochemistry</b>         |                  | ×       | ×                                         | Every 3 weeks                             |          |                      | ×                      |                    |
| <b>Routine blood test</b>         |                  | ×       | ×                                         | Every 3 weeks                             |          |                      | ×                      |                    |

|    |                                     |   |   |   |               |  |  |   |   |
|----|-------------------------------------|---|---|---|---------------|--|--|---|---|
| 1  |                                     |   |   |   |               |  |  |   |   |
| 2  |                                     |   |   |   |               |  |  |   |   |
| 3  |                                     |   |   |   |               |  |  |   |   |
| 4  | <b>Routine urine test</b>           | × | × |   | Every 3 weeks |  |  |   | × |
| 5  |                                     |   |   |   |               |  |  |   |   |
| 6  | <b>Routine stool test</b>           | × | × |   | Every 3 weeks |  |  |   | × |
| 7  |                                     |   |   |   |               |  |  |   |   |
| 8  | <b>Thyroid function, pituitary</b>  |   |   |   |               |  |  |   |   |
| 9  |                                     | × | × |   | Every 3 weeks |  |  |   | × |
| 10 | <b>function, coagulation</b>        |   |   |   |               |  |  |   |   |
| 11 | <b>Gut microbiome testing for</b>   |   |   |   |               |  |  |   |   |
| 12 |                                     | × |   |   | ×             |  |  |   | × |
| 13 | <b>the stool sample</b>             |   |   |   |               |  |  |   |   |
| 14 | <b>Biomarker testing for the</b>    |   |   |   |               |  |  |   |   |
| 15 |                                     | × |   |   | ×             |  |  |   | × |
| 16 | <b>blood sample</b>                 |   |   |   |               |  |  |   |   |
| 17 | <b>Surgical resection</b>           |   |   |   |               |  |  | × |   |
| 18 |                                     |   |   |   |               |  |  |   |   |
| 19 | <b>Surgical complications</b>       |   |   |   |               |  |  | × |   |
| 20 |                                     |   |   |   |               |  |  |   |   |
| 21 | <b>Concomitant medication</b>       | × | × | × | Every 3 weeks |  |  |   | × |
| 22 |                                     |   |   |   |               |  |  |   |   |
| 23 | <b>Adverse events</b>               | × | × | × | Every 3 weeks |  |  |   | × |
| 24 |                                     |   |   |   |               |  |  |   |   |
| 25 | <b>Compliance evaluation</b>        | × | × | × | Every 3 weeks |  |  |   |   |
| 26 |                                     |   |   |   |               |  |  |   |   |
| 27 | <b>Dispensing of drugs</b>          |   |   | × | Every 3 weeks |  |  |   |   |
| 28 |                                     |   |   |   |               |  |  |   |   |
| 29 | <b>Recovery of drugs</b>            |   |   | × | Every 3 weeks |  |  |   | × |
| 30 |                                     |   |   |   |               |  |  |   |   |
| 31 | <b>Follow-up on survival status</b> |   |   |   |               |  |  |   |   |
| 32 |                                     |   |   |   |               |  |  |   |   |
| 33 | <b>and antitumor treatment</b>      |   |   |   |               |  |  |   | × |
| 34 |                                     |   |   |   |               |  |  |   |   |
| 35 |                                     |   |   |   |               |  |  |   |   |
| 36 |                                     |   |   |   |               |  |  |   |   |
| 37 |                                     |   |   |   |               |  |  |   |   |
| 38 |                                     |   |   |   |               |  |  |   |   |
| 39 |                                     |   |   |   |               |  |  |   |   |
| 40 |                                     |   |   |   |               |  |  |   |   |
| 41 |                                     |   |   |   |               |  |  |   |   |
| 42 |                                     |   |   |   |               |  |  |   |   |
| 43 |                                     |   |   |   |               |  |  |   |   |
| 44 |                                     |   |   |   |               |  |  |   |   |
| 45 |                                     |   |   |   |               |  |  |   |   |
| 46 |                                     |   |   |   |               |  |  |   |   |

For peer review only

1  
2 Furthermore, for the testing of biomarkers as exploratory endpoints, stool and blood samples will be  
3  
4 collected from patients prior to the first treatment, at 7 weeks after the first treatment, and after  
5  
6 treatment discontinuation, respectively.  
7  
8  
9

### 10 **Data collection and management**

11  
12

13 The completed CRFs will be submitted to the respective sites for archiving. All data will be recorded  
14  
15 in an electronic case report form (eCRF) by investigators or clinical research coordinators. All study  
16  
17 documents will be confidential. All study data, including confirmation of all patients (effective check  
18  
19 on recorded information, such as study cases), all original copies of signed ICFs, as well as detailed  
20  
21 original records of drug distribution, shall be kept uniformly by the study institution until 5 years after  
22  
23 the end of the trial.  
24  
25  
26  
27

### 28 **Statistical methods**

29  
30  
31

32 According to the results of IMbrave150,<sup>6</sup> the ORR of atezolizumab plus bevacizumab in unresectable  
33  
34 HCC patients was 27.3%. The lack of evidence of atezolizumab, bevacizumab and radiotherapy in  
35  
36 patients with HCC and PVTT led to the difficulty of an evidence-based estimated ORR. Instead, we  
37  
38 searched for literatures of other systemic regimens combined with radiotherapy and found out the  
39  
40 ORR was 61.1% in HCC patients with PVTT treated with sorafenib and MIRT in a retrospective  
41  
42 study.<sup>23</sup> Hence, assuming an ORR of 47% after discussion among investigators based on the  
43  
44 experience, with a two-sided alpha error of 0.1, 90% power, and 10% dropout rate, the required  
45  
46 number of evaluable patients is 42.  
47  
48  
49  
50

51 The efficacy assessment is based on the full analysis set (FAS). The intention-to-treat (ITT) efficacy  
52  
53 analysis will be performed for subjects who received at least one session of the study treatment based  
54  
55 on the FAS. No supplementation will be made for missing values. The safety analysis set (SAS)  
56  
57 includes all enrolled subjects who have received at least one session of study treatment and have a  
58  
59 post-treatment safety record. This dataset will be used for safety analysis.  
60

## Monitoring

An independent Data and Safety Monitoring Committee has been established to assess the safety data if serious adverse events occur. Any adverse events will be registered. A qualified and independent auditor is appointed to audit the trial systems, and the audit will be conducted before and during the study following a written procedure. The stopping rules for the trial are 1) the investigators find serious safety issues, or 2) the administrative department cancels the trial. The termination of the trial can be temporary or permanent. When terminating the trial, all records will be kept for future reference.

## Patient and public involvement

The patients and general public were not involved in the trial design.

## Discussion

Atezolizumab plus bevacizumab is the standard first-line therapy for unresectable HCC patients. Although the combination can significantly improve the prognosis in patients, the ORR is still not satisfactory.<sup>6</sup> Improving the therapeutic effect in patients is still a great clinical challenge. For patients with HCC, vascular invasion and metastasis are important reasons these patients cannot undergo surgical resection, as well as poor prognostic factors. Radiotherapy has an important role in treating patients with PVTT; however, the therapeutic effects are still limited. Previous clinical studies have shown that radiotherapy combined with targeted therapy, such as sorafenib, tends to prolong the overall survival of patients with HCC complicated by PVTT. In the meanwhile, a retrospective study reported the feasibility of radiotherapy combined with atezolizumab plus bevacizumab in unresectable HCC.<sup>22</sup> However, evidence on whether the combination of radiotherapy with atezolizumab plus bevacizumab can improve the therapeutic effects in unresectable HCC patients with PVTT is still warranted. Accordingly, this open-label, multicenter, single-arm clinical trial was

1  
2 designed to preliminarily explore the efficacy and safety of radiotherapy combined with atezolizumab  
3  
4 plus bevacizumab in naive unresectable HCC patients with PVTT.  
5  
6

7  
8 There are several limitations in the present study that should be considered. First, this is a single-arm  
9  
10 clinical trial without a control group that could be used to compare the efficacy and safety between  
11  
12 treatment regimens. Second, since this study is an exploratory trial with a small sample size, no  
13  
14 confirmatory efficacy conclusions can be drawn. The conclusions of this study may serve as  
15  
16 preliminary evidence for subsequent large-scale, randomized, controlled clinical trials.  
17  
18

19  
20 As the prognosis in unresectable HCC patients with PVTT remains poor, there is an urgent need to  
21  
22 find an efficacious and safe therapeutic regimen. In this study, the efficacy and safety of IMRT  
23  
24 combined with atezolizumab plus bevacizumab in native unresectable HCC patients with PVTT will  
25  
26 be investigated so as to explore a new therapeutic regimen and further improve the efficacy and  
27  
28 prognosis in these patients.  
29  
30

### 31 32 33 **Ethics and dissemination**

34  
35  
36 This study will be conducted according to the standards of Good Clinical Practice and in compliance  
37  
38 with the principles of the Declaration of Helsinki. The Ethics Committee of our Hospital has approved  
39  
40 the protocol (EHBHKY2021-K-017). All participants are required to provide written informed  
41  
42 consent. The results of the trial will be published in peer-reviewed journals and presented at  
43  
44 international conferences.  
45  
46

### 47 48 49 **Trial status**

50  
51  
52 The trial has been registered in ChiCTR.org (Registration number: ChiCTR2100049831; registration  
53  
54 date: 2021-08-10; <http://www.chictr.org.cn/showproj.aspx?proj=126593>). Recruitment is ongoing.  
55  
56 The protocol version number is 1.0. The study protocol has been reported in accordance with the  
57  
58 Standard Protocol Items: Recommendations for Clinical Interventional Trials (SPIRIT) guidelines.  
59  
60

## Acknowledgments

The authors would like to thank the patients, their families, and all the investigators who will participate in the present study.

## Data Sharing Statement

We will widely disseminate the results of this clinical trial through conference presentations and publications in relevant journals. All evaluation forms, reports, and other records will be identified in a manner designed to maintain participants' confidentiality. All records will be kept in a secure storage area with limited access. Data during the study are available from the study leader upon reasonable request.

## Authors' contributions

Kang Wang and Yan-Jun Xiang drafted the manuscript. Kang Wang, Yan-Jun Xiang, and Hong-Ming Yu contributed equally to this work. Shu-Qun Cheng, Kang Wang, Yan-Jun Xiang, and Hong-Ming Yu designed the trial. Yu-Qiang Cheng, Qian-Zhi Ni, Wei-Xing Guo, Jie Shi, Shuang Feng, and Jian Zhai are responsible for planning the data analysis and analyzing the data resulting from the trial. All named authors adhere to the authorship guidelines of Trials. All authors have agreed to publication. All authors read and approved the final manuscript.

## Funding

This work was supported by the Clinical Research Plan of SHDC (No. SHDC2020CR1004A), the State Key Program of the National Natural Science Foundation of China (No: 81730097), the National Natural Science Foundation of China (No: 82072618), and the Science and Technology Commission Foundation of Shanghai Municipality (No: 19411967300). The Fundings have no roles in the design of the study and collection, analysis, and interpretation of data and in writing the manuscript.

1  
2 **Conflict of interest**  
3  
4

5 The authors have no conflicts of interest to declare.  
6  
7  
8  
9  
10  
11  
12  
13  
14  
15  
16  
17  
18  
19  
20  
21  
22  
23  
24  
25  
26  
27  
28  
29  
30  
31  
32  
33  
34  
35  
36  
37  
38  
39  
40  
41  
42  
43  
44  
45  
46  
47  
48  
49  
50  
51  
52  
53  
54  
55  
56  
57  
58  
59  
60

For peer review only

## Reference

1. Sung H, Ferlay J, Siegel RL, et al. Global Cancer Statistics 2020: GLOBOCAN Estimates of Incidence and Mortality Worldwide for 36 Cancers in 185 Countries. *CA: a cancer journal for clinicians* 2021;71(3):209-49. doi: 10.3322/caac.21660 [published Online First: 2021/02/05]
2. Zheng R, Qu C, Zhang S, et al. Liver cancer incidence and mortality in China: Temporal trends and projections to 2030. *Chin J Cancer Res* 2018;30(6):571-79. doi: 10.21147/j.issn.1000-9604.2018.06.01
3. Zeng H, Chen W, Zheng R, et al. Changing cancer survival in China during 2003–15: a pooled analysis of 17 population-based cancer registries. *The Lancet Global Health* 2018;6(5):e555-e67. doi: 10.1016/s2214-109x(18)30127-x
4. Craig AJ, von Felden J, Garcia-Lezana T, et al. Tumour evolution in hepatocellular carcinoma. *Nat Rev Gastroenterol Hepatol* 2020;17(3):139-52. doi: 10.1038/s41575-019-0229-4
5. Kudo M, Trevisani F, Abou-Alfa GK, et al. Hepatocellular Carcinoma: Therapeutic Guidelines and Medical Treatment. *Liver Cancer* 2016;6(1):16-26. doi: 10.1159/000449343
6. Finn RS, Qin S, Ikeda M, et al. Atezolizumab plus Bevacizumab in Unresectable Hepatocellular Carcinoma. *N Engl J Med* 2020;382(20):1894-905. doi: 10.1056/NEJMoa1915745
7. Zhang ZM, Lai EC, Zhang C, et al. The strategies for treating primary hepatocellular carcinoma with portal vein tumor thrombus. *Int J Surg* 2015;20:8-16. doi: 10.1016/j.ijssu.2015.05.009
8. Pawarode A, Voravud N, Sriuranpong V, et al. Natural history of untreated primary hepatocellular carcinoma: a retrospective study of 157 patients. *Am J Clin Oncol* 1998;21(4):386-91. doi: 10.1097/00000421-199808000-00014
9. Lu J, Zhang XP, Zhong BY, et al. Management of patients with hepatocellular carcinoma and portal vein tumour thrombosis: comparing east and west. *Lancet Gastroenterol Hepatol* 2019;4(9):721-30. doi: 10.1016/S2468-1253(19)30178-5



- 1  
2 10. Heimbach JK, Kulik LM, Finn RS, et al. AASLD guidelines for the treatment of hepatocellular  
3  
4 carcinoma. *Hepatology* 2018;67(1):358-80. doi: 10.1002/hep.29086  
5
- 6  
7 11. European Association For The Study Of The L, European Organisation For R, Treatment Of C.  
8  
9 EASL-EORTC clinical practice guidelines: management of hepatocellular carcinoma. *J*  
10  
11 *Hepatol* 2012;56(4):908-43. doi: 10.1016/j.jhep.2011.12.001  
12
- 13  
14 12. Omata M, Lesmana LA, Tateishi R, et al. Asian Pacific Association for the Study of the Liver  
15  
16 consensus recommendations on hepatocellular carcinoma. *Hepatol Int* 2010;4(2):439-74. doi:  
17  
18 10.1007/s12072-010-9165-7  
19
- 20  
21 13. Yoon SM, Ryoo BY, Lee SJ, et al. Efficacy and Safety of Transarterial Chemoembolization Plus  
22  
23 External Beam Radiotherapy vs Sorafenib in Hepatocellular Carcinoma With Macroscopic  
24  
25 Vascular Invasion: A Randomized Clinical Trial. *JAMA Oncol* 2018;4(5):661-69. doi:  
26  
27 10.1001/jamaoncol.2017.5847  
28
- 29  
30 14. Cheng S, Yang J, Shen F, et al. Multidisciplinary management of hepatocellular carcinoma with  
31  
32 portal vein tumor thrombus - Eastern Hepatobiliary Surgical Hospital consensus statement.  
33  
34 *Oncotarget* 2016;7(26):40816-29. doi: 10.18632/oncotarget.8386 [published Online First:  
35  
36 2016/10/27]  
37
- 38  
39 15. Kudo M, Kawamura Y, Hasegawa K, et al. Management of Hepatocellular Carcinoma in Japan:  
40  
41 JSH Consensus Statements and Recommendations 2021 Update. *Liver Cancer*  
42  
43 2021;10(3):181-223. doi: 10.1159/000514174 [published Online First: 2021/07/10]  
44
- 45  
46 16. Xie DY, Ren ZG, Zhou J, et al. 2019 Chinese clinical guidelines for the management of  
47  
48 hepatocellular carcinoma: updates and insights. *Hepatobiliary Surg Nutr* 2020;9(4):452-63.  
49  
50 doi: 10.21037/hbsn-20-480 [published Online First: 2020/08/25]  
51
- 52  
53 17. Arina A, Gutiontov SI, Weichselbaum RR. Radiotherapy and Immunotherapy for Cancer: From  
54  
55 "Systemic" to "Multisite". *Clin Cancer Res* 2020;26(12):2777-82. doi: 10.1158/1078-  
56  
57 0432.CCR-19-2034  
58  
59  
60

1  
2  
3  
4  
5  
6  
7  
8  
9  
10  
11  
12  
13  
14  
15  
16  
17  
18  
19  
20  
21  
22  
23  
24  
25  
26  
27  
28  
29  
30  
31  
32  
33  
34  
35  
36  
37  
38  
39  
40  
41  
42  
43  
44  
45  
46  
47  
48  
49  
50  
51  
52  
53  
54  
55  
56  
57  
58  
59  
60

18. Ozpiskin OM, Zhang L, Li JJ. Immune targets in the tumor microenvironment treated by radiotherapy. *Theranostics* 2019;9(5):1215-31. doi: 10.7150/thno.32648
19. Yu JI, Yoon SM, Park HC, et al. Multicenter validation study of a prognostic index for portal vein tumor thrombosis in hepatocellular carcinoma. *Cancer Res Treat* 2014;46(4):348-57. doi: 10.4143/crt.2013.142
20. Chen SW, Lin LC, Kuo YC, et al. Phase 2 study of combined sorafenib and radiation therapy in patients with advanced hepatocellular carcinoma. *Int J Radiat Oncol Biol Phys* 2014;88(5):1041-7. doi: 10.1016/j.ijrobp.2014.01.017 [published Online First: 2014/03/26]
21. Rim CH, Park S, Shin IS, et al. Is the Concurrent Use of Sorafenib and External Radiotherapy Feasible for Advanced Hepatocellular Carcinoma? A Meta-Analysis. *Cancers (Basel)* 2021;13(12) doi: 10.3390/cancers13122912 [published Online First: 2021/07/03]
22. Manzar GS, De BS, Abana CO, et al. Outcomes and Toxicities of Modern Combined Modality Therapy with Atezolizumab Plus Bevacizumab and Radiation Therapy for Hepatocellular Carcinoma. *Cancers (Basel)* 2022;14(8) doi: 10.3390/cancers14081901 [published Online First: 2022/04/24]
23. Abulimiti M, Li Z, Wang H, et al. Combination Intensity-Modulated Radiotherapy and Sorafenib Improves Outcomes in Hepatocellular Carcinoma with Portal Vein Tumor Thrombosis. *J Oncol* 2021;2021:9943683. doi: 10.1155/2021/9943683



SPIRIT 2013 Checklist: Recommended items to address in a clinical trial protocol and related documents\*

| Section/item                      | ItemNo | Description                                                                                                                                                                                                                                                                              | Page  |
|-----------------------------------|--------|------------------------------------------------------------------------------------------------------------------------------------------------------------------------------------------------------------------------------------------------------------------------------------------|-------|
| <b>Administrative information</b> |        |                                                                                                                                                                                                                                                                                          |       |
| Title                             | 1      | Descriptive title identifying the study design, population, interventions, and, if applicable, trial acronym                                                                                                                                                                             | P1    |
| Trial registration                | 2a     | Trial identifier and registry name. If not yet registered, name of intended registry                                                                                                                                                                                                     | P2/10 |
|                                   | 2b     | All items from the World Health Organization Trial Registration Data Set                                                                                                                                                                                                                 | NA    |
| Protocol version                  | 3      | Date and version identifier                                                                                                                                                                                                                                                              | P10   |
| Funding                           | 4      | Sources and types of financial, material, and other support                                                                                                                                                                                                                              | P14   |
| Roles and responsibilities        | 5a     | Names, affiliations, and roles of protocol contributors                                                                                                                                                                                                                                  | P14   |
|                                   | 5b     | Name and contact information for the trial sponsor                                                                                                                                                                                                                                       | P14   |
|                                   | 5c     | Role of study sponsor and funders, if any, in study design; collection, management, analysis, and interpretation of data; writing of the report; and the decision to submit the report for publication, including whether they will have ultimate authority over any of these activities | P14   |
|                                   | 5d     | Composition, roles, and responsibilities of the coordinating centre, steering committee, endpoint adjudication committee, data management team, and other individuals or groups overseeing the trial, if applicable (see Item 21a for data monitoring committee)                         | P14   |
| <b>Introduction</b>               |        |                                                                                                                                                                                                                                                                                          |       |
| Background and rationale          | 6a     | Description of research question and justification for undertaking the trial, including summary of relevant studies (published and unpublished) examining benefits and harms for each intervention                                                                                       | P3-4  |

|    |                                                           |     |                                                          |          |
|----|-----------------------------------------------------------|-----|----------------------------------------------------------|----------|
| 1  |                                                           |     |                                                          |          |
| 2  |                                                           | 6b  | Explanation for choice of comparators                    | NA       |
| 3  |                                                           |     |                                                          |          |
| 4  | Objectives                                                | 7   | Specific objectives or hypotheses                        | P4       |
| 5  |                                                           |     |                                                          |          |
| 6  | Trial design                                              | 8   | Description of trial design including type of trial (eg, | P4       |
| 7  |                                                           |     | parallel group, crossover, factorial, single group),     |          |
| 8  |                                                           |     | allocation ratio, and framework (eg, superiority,        |          |
| 9  |                                                           |     | equivalence, noninferiority, exploratory)                |          |
| 10 |                                                           |     |                                                          |          |
| 11 |                                                           |     |                                                          |          |
| 12 | <b>Methods: Participants, interventions, and outcomes</b> |     |                                                          |          |
| 13 |                                                           |     |                                                          |          |
| 14 | Study setting                                             | 9   | Description of study settings (eg, community clinic,     | P5       |
| 15 |                                                           |     | academic hospital) and list of countries where data      |          |
| 16 |                                                           |     | will be collected. Reference to where list of study      |          |
| 17 |                                                           |     | sites can be obtained                                    |          |
| 18 |                                                           |     |                                                          |          |
| 19 | Eligibility criteria                                      | 10  | Inclusion and exclusion criteria for participants. If    | P5/16-21 |
| 20 |                                                           |     | applicable, eligibility criteria for study centres and   |          |
| 21 |                                                           |     | individuals who will perform the interventions (eg,      |          |
| 22 |                                                           |     | surgeons, psychotherapists)                              |          |
| 23 |                                                           |     |                                                          |          |
| 24 |                                                           |     |                                                          |          |
| 25 | Interventions                                             | 11a | Interventions for each group with sufficient detail to   | P5-6     |
| 26 |                                                           |     | allow replication, including how and when they will      |          |
| 27 |                                                           |     | be administered                                          |          |
| 28 |                                                           |     |                                                          |          |
| 29 |                                                           |     |                                                          |          |
| 30 |                                                           | 11b | Criteria for discontinuing or modifying allocated        | P6       |
| 31 |                                                           |     | interventions for a given trial participant (eg, drug    |          |
| 32 |                                                           |     | dose change in response to harms, participant            |          |
| 33 |                                                           |     | request, or improving/worsening disease)                 |          |
| 34 |                                                           |     |                                                          |          |
| 35 |                                                           | 11c | Strategies to improve adherence to intervention          | P6       |
| 36 |                                                           |     | protocols, and any procedures for monitoring             |          |
| 37 |                                                           |     | adherence (eg, drug tablet return, laboratory tests)     |          |
| 38 |                                                           |     |                                                          |          |
| 39 |                                                           |     |                                                          |          |
| 40 |                                                           | 11d | Relevant concomitant care and interventions that         | P6       |
| 41 |                                                           |     | are permitted or prohibited during the trial             |          |
| 42 |                                                           |     |                                                          |          |
| 43 | Outcomes                                                  | 12  | Primary, secondary, and other outcomes, including        | P6-7     |
| 44 |                                                           |     | the specific measurement variable (eg, systolic          |          |
| 45 |                                                           |     | blood pressure), analysis metric (eg, change from        |          |
| 46 |                                                           |     | baseline, final value, time to event), method of         |          |
| 47 |                                                           |     | aggregation (eg, median, proportion), and time point     |          |
| 48 |                                                           |     | for each outcome. Explanation of the clinical            |          |
| 49 |                                                           |     | relevance of chosen efficacy and harm outcomes is        |          |
| 50 |                                                           |     | strongly recommended                                     |          |
| 51 |                                                           |     |                                                          |          |
| 52 |                                                           |     |                                                          |          |
| 53 | Participant                                               | 13  | Time schedule of enrolment, interventions (including     | P7       |
| 54 | timeline                                                  |     | any run-ins and washouts), assessments, and visits       |          |
| 55 |                                                           |     | for participants. A schematic diagram is highly          |          |
| 56 |                                                           |     | recommended (see Figure)                                 |          |
| 57 |                                                           |     |                                                          |          |
| 58 |                                                           |     |                                                          |          |
| 59 |                                                           |     |                                                          |          |
| 60 |                                                           |     |                                                          |          |

|   |             |    |                                                    |    |
|---|-------------|----|----------------------------------------------------|----|
| 1 |             |    |                                                    |    |
| 2 | Sample size | 14 | Estimated number of participants needed to achieve | P8 |
| 3 |             |    | study objectives and how it was determined,        |    |
| 4 |             |    | including clinical and statistical assumptions     |    |
| 5 |             |    | supporting any sample size calculations            |    |
| 6 |             |    |                                                    |    |
| 7 | Recruitment | 15 | Strategies for achieving adequate participant      | P8 |
| 8 |             |    | enrolment to reach target sample size              |    |
| 9 |             |    |                                                    |    |

### Methods: Assignment of interventions (for controlled trials)

#### Allocation:

|    |                |     |                                                          |    |
|----|----------------|-----|----------------------------------------------------------|----|
| 14 | Sequence       | 16a | Method of generating the allocation sequence (eg,        | NA |
| 15 | generation     |     | computer-generated random numbers), and list of          |    |
| 16 |                |     | any factors for stratification. To reduce predictability |    |
| 17 |                |     | of a random sequence, details of any planned             |    |
| 18 |                |     | restriction (eg, blocking) should be provided in a       |    |
| 19 |                |     | separate document that is unavailable to those who       |    |
| 20 |                |     | enrol participants or assign interventions               |    |
| 21 |                |     |                                                          |    |
| 22 |                |     |                                                          |    |
| 23 |                |     |                                                          |    |
| 24 | Allocation     | 16b | Mechanism of implementing the allocation sequence        | NA |
| 25 | concealment    |     | (eg, central telephone; sequentially numbered,           |    |
| 26 | mechanism      |     | opaque, sealed envelopes), describing any steps to       |    |
| 27 |                |     | conceal the sequence until interventions are             |    |
| 28 |                |     | assigned                                                 |    |
| 29 |                |     |                                                          |    |
| 30 |                |     |                                                          |    |
| 31 | Implementation | 16c | Who will generate the allocation sequence, who will      | NA |
| 32 |                |     | enrol participants, and who will assign participants     |    |
| 33 |                |     | to interventions                                         |    |
| 34 |                |     |                                                          |    |
| 35 | Blinding       | 17a | Who will be blinded after assignment to                  | NA |
| 36 | (masking)      |     | interventions (eg, trial participants, care providers,   |    |
| 37 |                |     | outcome assessors, data analysts), and how               |    |
| 38 |                |     |                                                          |    |
| 39 |                |     |                                                          |    |
| 40 |                | 17b | If blinded, circumstances under which unblinding is      | NA |
| 41 |                |     | permissible, and procedure for revealing a               |    |
| 42 |                |     | participant's allocated intervention during the trial    |    |
| 43 |                |     |                                                          |    |

### Methods: Data collection, management, and analysis

|    |                 |     |                                                        |    |
|----|-----------------|-----|--------------------------------------------------------|----|
| 46 | Data collection | 18a | Plans for assessment and collection of outcome,        | P7 |
| 47 | methods         |     | baseline, and other trial data, including any related  |    |
| 48 |                 |     | processes to promote data quality (eg, duplicate       |    |
| 49 |                 |     | measurements, training of assessors) and a             |    |
| 50 |                 |     | description of study instruments (eg, questionnaires,  |    |
| 51 |                 |     | laboratory tests) along with their reliability and     |    |
| 52 |                 |     | validity, if known. Reference to where data collection |    |
| 53 |                 |     | forms can be found, if not in the protocol             |    |
| 54 |                 |     |                                                        |    |
| 55 |                 |     |                                                        |    |
| 56 |                 |     |                                                        |    |
| 57 |                 |     |                                                        |    |
| 58 |                 |     |                                                        |    |
| 59 |                 |     |                                                        |    |
| 60 |                 |     |                                                        |    |

|    |                            |     |                                                           |    |
|----|----------------------------|-----|-----------------------------------------------------------|----|
| 1  |                            |     |                                                           |    |
| 2  |                            | 18b | Plans to promote participant retention and complete       | P7 |
| 3  |                            |     | follow-up, including list of any outcome data to be       |    |
| 4  |                            |     | collected for participants who discontinue or deviate     |    |
| 5  |                            |     | from intervention protocols                               |    |
| 6  |                            |     |                                                           |    |
| 7  | Data                       | 19  | Plans for data entry, coding, security, and storage,      | P7 |
| 8  | management                 |     | including any related processes to promote data           |    |
| 9  |                            |     | quality (eg, double data entry; range checks for data     |    |
| 10 |                            |     | values). Reference to where details of data               |    |
| 11 |                            |     | management procedures can be found, if not in the         |    |
| 12 |                            |     | protocol                                                  |    |
| 13 |                            |     |                                                           |    |
| 14 |                            |     |                                                           |    |
| 15 | Statistical                | 20a | Statistical methods for analysing primary and             | P8 |
| 16 | methods                    |     | secondary outcomes. Reference to where other              |    |
| 17 |                            |     | details of the statistical analysis plan can be found, if |    |
| 18 |                            |     | not in the protocol                                       |    |
| 19 |                            |     |                                                           |    |
| 20 |                            |     |                                                           |    |
| 21 |                            | 20b | Methods for any additional analyses (eg, subgroup         | P8 |
| 22 |                            |     | and adjusted analyses)                                    |    |
| 23 |                            |     |                                                           |    |
| 24 |                            | 20c | Definition of analysis population relating to protocol    | P8 |
| 25 |                            |     | non-adherence (eg, as randomised analysis), and           |    |
| 26 |                            |     | any statistical methods to handle missing data (eg,       |    |
| 27 |                            |     | multiple imputation)                                      |    |
| 28 |                            |     |                                                           |    |
| 29 |                            |     |                                                           |    |
| 30 | <b>Methods: Monitoring</b> |     |                                                           |    |
| 31 |                            |     |                                                           |    |
| 32 | Data monitoring            | 21a | Composition of data monitoring committee (DMC);           | P8 |
| 33 |                            |     | summary of its role and reporting structure;              |    |
| 34 |                            |     | statement of whether it is independent from the           |    |
| 35 |                            |     | sponsor and competing interests; and reference to         |    |
| 36 |                            |     | where further details about its charter can be found,     |    |
| 37 |                            |     | if not in the protocol. Alternatively, an explanation of  |    |
| 38 |                            |     | why a DMC is not needed                                   |    |
| 39 |                            |     |                                                           |    |
| 40 |                            |     |                                                           |    |
| 41 |                            | 21b | Description of any interim analyses and stopping          | P8 |
| 42 |                            |     | guidelines, including who will have access to these       |    |
| 43 |                            |     | interim results and make the final decision to            |    |
| 44 |                            |     | terminate the trial                                       |    |
| 45 |                            |     |                                                           |    |
| 46 |                            |     |                                                           |    |
| 47 | Harms                      | 22  | Plans for collecting, assessing, reporting, and           | P8 |
| 48 |                            |     | managing solicited and spontaneously reported             |    |
| 49 |                            |     | adverse events and other unintended effects of trial      |    |
| 50 |                            |     | interventions or trial conduct                            |    |
| 51 |                            |     |                                                           |    |
| 52 |                            |     |                                                           |    |
| 53 | Auditing                   | 23  | Frequency and procedures for auditing trial conduct,      | P8 |
| 54 |                            |     | if any, and whether the process will be independent       |    |
| 55 |                            |     | from investigators and the sponsor                        |    |
| 56 |                            |     |                                                           |    |
| 57 |                            |     |                                                           |    |

## Ethics and dissemination

58  
59  
60

|    |                   |     |                                                          |     |
|----|-------------------|-----|----------------------------------------------------------|-----|
| 1  |                   |     |                                                          |     |
| 2  | Research ethics   | 24  | Plans for seeking research ethics                        | P9  |
| 3  | approval          |     | committee/institutional review board (REC/IRB)           |     |
| 4  |                   |     | approval                                                 |     |
| 5  |                   |     |                                                          |     |
| 6  | Protocol          | 25  | Plans for communicating important protocol               | P10 |
| 7  | amendments        |     | modifications (eg, changes to eligibility criteria,      |     |
| 8  |                   |     | outcomes, analyses) to relevant parties (eg,             |     |
| 9  |                   |     | investigators, REC/IRBs, trial participants, trial       |     |
| 10 |                   |     | registries, journals, regulators)                        |     |
| 11 |                   |     |                                                          |     |
| 12 |                   |     |                                                          |     |
| 13 | Consent or        | 26a | Who will obtain informed consent or assent from          | P9  |
| 14 | assent            |     | potential trial participants or authorised surrogates,   |     |
| 15 |                   |     | and how (see Item 32)                                    |     |
| 16 |                   |     |                                                          |     |
| 17 |                   |     |                                                          |     |
| 18 |                   | 26b | Additional consent provisions for collection and use     | NA  |
| 19 |                   |     | of participant data and biological specimens in          |     |
| 20 |                   |     | ancillary studies, if applicable                         |     |
| 21 |                   |     |                                                          |     |
| 22 | Confidentiality   | 27  | How personal information about potential and             | P14 |
| 23 |                   |     | enrolled participants will be collected, shared, and     |     |
| 24 |                   |     | maintained in order to protect confidentiality before,   |     |
| 25 |                   |     | during, and after the trial                              |     |
| 26 |                   |     |                                                          |     |
| 27 |                   |     |                                                          |     |
| 28 | Declaration of    | 28  | Financial and other competing interests for principal    | P14 |
| 29 | interests         |     | investigators for the overall trial and each study site  |     |
| 30 |                   |     |                                                          |     |
| 31 | Access to data    | 29  | Statement of who will have access to the final trial     | P14 |
| 32 |                   |     | dataset, and disclosure of contractual agreements        |     |
| 33 |                   |     | that limit such access for investigators                 |     |
| 34 |                   |     |                                                          |     |
| 35 | Ancillary and     | 30  | Provisions, if any, for ancillary and post-trial care,   | NA  |
| 36 | post-trial care   |     | and for compensation to those who suffer harm from       |     |
| 37 |                   |     | trial participation                                      |     |
| 38 |                   |     |                                                          |     |
| 39 |                   |     |                                                          |     |
| 40 | Dissemination     | 31a | Plans for investigators and sponsor to communicate       | P8  |
| 41 | policy            |     | trial results to participants, healthcare professionals, |     |
| 42 |                   |     | the public, and other relevant groups (eg, via           |     |
| 43 |                   |     | publication, reporting in results databases, or other    |     |
| 44 |                   |     | data sharing arrangements), including any                |     |
| 45 |                   |     | publication restrictions                                 |     |
| 46 |                   |     |                                                          |     |
| 47 |                   |     |                                                          |     |
| 48 |                   | 31b | Authorship eligibility guidelines and any intended       | NA  |
| 49 |                   |     | use of professional writers                              |     |
| 50 |                   |     |                                                          |     |
| 51 |                   | 31c | Plans, if any, for granting public access to the full    | NA  |
| 52 |                   |     | protocol, participant-level dataset, and statistical     |     |
| 53 |                   |     | code                                                     |     |
| 54 |                   |     |                                                          |     |
| 55 |                   |     |                                                          |     |
| 56 | <b>Appendices</b> |     |                                                          |     |
| 57 |                   |     |                                                          |     |
| 58 |                   |     |                                                          |     |
| 59 |                   |     |                                                          |     |
| 60 |                   |     |                                                          |     |

|    |                  |    |                                                        |    |
|----|------------------|----|--------------------------------------------------------|----|
| 1  |                  |    |                                                        |    |
| 2  | Informed consent | 32 | Model consent form and other related                   | NA |
| 3  | materials        |    | documentation given to participants and authorised     |    |
| 4  |                  |    | surrogates                                             |    |
| 5  |                  |    |                                                        |    |
| 6  | Biological       | 33 | Plans for collection, laboratory evaluation, and       | NA |
| 7  | specimens        |    | storage of biological specimens for genetic or         |    |
| 8  |                  |    | molecular analysis in the current trial and for future |    |
| 9  |                  |    | use in ancillary studies, if applicable                |    |
| 10 |                  |    |                                                        |    |

11  
12 \*It is strongly recommended that this checklist be read in conjunction with the SPIRIT 2013  
13 Explanation & Elaboration for important clarification on the items. Amendments to the  
14 protocol should be tracked and dated. The SPIRIT checklist is copyrighted by the SPIRIT  
15 Group under the Creative Commons "[Attribution-NonCommercial-NoDerivs 3.0 Unported](#)"  
16 license.  
17  
18  
19  
20  
21  
22  
23  
24  
25  
26  
27  
28  
29  
30  
31  
32  
33  
34  
35  
36  
37  
38  
39  
40  
41  
42  
43  
44  
45  
46  
47  
48  
49  
50  
51  
52  
53  
54  
55  
56  
57  
58  
59  
60
